# Supplementary material for: Inter-annual variability of the effects of intrinsic and extrinsic drivers affecting West Nile virus vector Culex pipiens population dynamics in northeastern Italy
Source: PubMed Central journal article supplement (PMC7260749; doi:10.1186/s13071-020-04143-w), 2020-05-29
Supplement: 13071_2020_4143_MOESM2_ESM.pdf [file 13071_2020_4143_MOESM2_ESM.pdf]

**Additional file 2: Table S3.** Lists of models per year included in the subsets considered in the study; models are ordered by decreasing  $wAIC_c$  and likelihood-ratio-based pseudo- $R^2$  ( $R^2_{LR}$ ) is reported to indicate the goodness-of-fit of each model

**2010-2018**

| Rank | Model                                                                                                     | $\Delta AIC_c$ | $wAIC_c$ | Cumulative $wAIC_c$ | $R^2_{LR}$ |
|------|-----------------------------------------------------------------------------------------------------------|----------------|----------|---------------------|------------|
| 1    | Growth Rate ~ Intercept + DMI15d + GMP + DT.h + PREC.k15d + T.sd15d + GDD15d + NDVI15d                    | 0.000          | 0.061    | 0.058               | 0.75       |
| 2    | Growth Rate ~ Intercept + DMI15d + GMP + DT.h + PREC.k15d + T.sd15d + NDVI15d                             | 0.572          | 0.046    | 0.101               | 0.75       |
| 3    | Growth Rate ~ Intercept + DMI15d + GMP + DT.h + PREC.k15d + T.sd15d + T.night + GDD15d + NDVI15d          | 0.704          | 0.043    | 0.142               | 0.75       |
| 4    | Growth Rate ~ Intercept + DMI15d + GMP + DT.h + T.sd15d + GDD15d + NDVI15d                                | 0.721          | 0.042    | 0.182               | 0.75       |
| 5    | Growth Rate ~ Intercept + DMI15d + GMP + DT.h + PREC.k15d + GDD15d + NDVI15d                              | 0.774          | 0.041    | 0.221               | 0.75       |
| 6    | Growth Rate ~ Intercept + DMI15d + GMP + DT.h + PREC.k15d + T.night + GDD15d + NDVI15d                    | 0.842          | 0.040    | 0.259               | 0.75       |
| 7    | Growth Rate ~ Intercept + DMI15d + GMP + DT.h + T.sd15d + T.night + GDD15d + NDVI15d                      | 1.336          | 0.031    | 0.288               | 0.75       |
| 8    | Growth Rate ~ Intercept + DMI15d + GMP + DT.h + PREC.k15d + T.k15d + T.sd15d + GDD15d + NDVI15d           | 1.424          | 0.030    | 0.317               | 0.75       |
| 9    | Growth Rate ~ Intercept + DMI15d + GMP + DT.h + T.night + GDD15d + NDVI15d                                | 1.467          | 0.029    | 0.344               | 0.75       |
| 10   | Growth Rate ~ Intercept + DMI15d + GMP + DT.h + GDD15d + NDVI15d                                          | 1.508          | 0.029    | 0.371               | 0.75       |
| 11   | Growth Rate ~ Intercept + DMI15d + GMP + DT.h + PREC.k15d + T.sd15d + T.night + NDVI15d                   | 1.837          | 0.024    | 0.394               | 0.75       |
| 12   | Growth Rate ~ Intercept + DMI15d + GMP + DT.h + PREC.k15d + T.k15d + T.sd15d + T.night + GDD15d + NDVI15d | 1.867          | 0.024    | 0.417               | 0.75       |
| 13   | Growth Rate ~ Intercept + DMI15d + GMP + DT.h + PREC + PREC.k15d + T.sd15d + GDD15d + NDVI15d             | 1.983          | 0.023    | 0.438               | 0.75       |
| 14   | Growth Rate ~ Intercept + DMI15d + GMP + DT.h + PREC.k15d + NDVI15d                                       | 2.061          | 0.022    | 0.459               | 0.75       |
| 15   | Growth Rate ~ Intercept + DMI15d + GMP + DT.h + PREC.k15d + T.k15d + T.sd15d + NDVI15d                    | 2.108          | 0.021    | 0.479               | 0.75       |
| 16   | Growth Rate ~ Intercept + DMI15d + GMP + DT.h + T.k15d + T.sd15d + GDD15d + NDVI15d                       | 2.295          | 0.019    | 0.497               | 0.75       |
| 17   | Growth Rate ~ Intercept + DMI15d + GMP + DT.h + T.sd15d + NDVI15d                                         | 2.439          | 0.018    | 0.514               | 0.75       |
| 18   | Growth Rate ~ Intercept + DMI15d + GMP + DT.h + PREC.k15d + T.k15d + T.night + GDD15d + NDVI15d           | 2.458          | 0.018    | 0.531               | 0.75       |
| 19   | Growth Rate ~ Intercept + DMI15d + GMP + DT.h + PREC + PREC.k15d + T.sd15d + T.night + GDD15d + NDVI15d   | 2.583          | 0.017    | 0.547               | 0.75       |
| 20   | Growth Rate ~ Intercept + DMI15d + GMP + DT.h + PREC + PREC.k15d + T.sd15d + NDVI15d                      | 2.584          | 0.017    | 0.563               | 0.75       |
| 21   | Growth Rate ~ Intercept + DMI15d + GMP + DT.h + PREC.k15d + T.k15d + GDD15d + NDVI15d                     | 2.623          | 0.016    | 0.579               | 0.75       |
| 22   | Growth Rate ~ Intercept + DMI15d + GMP + DT.h + T.k15d + T.sd15d + T.night + GDD15d + NDVI15d             | 2.672          | 0.016    | 0.594               | 0.75       |
| 23   | Growth Rate ~ Intercept + DMI15d + GMP + DT.h + PREC + PREC.k15d + T.night + GDD15d + NDVI15d             | 2.705          | 0.016    | 0.609               | 0.75       |
| 24   | Growth Rate ~ Intercept + DMI15d + GMP + DT.h + PREC + T.sd15d + GDD15d + NDVI15d                         | 2.714          | 0.016    | 0.623               | 0.75       |
| 25   | Growth Rate ~ Intercept + DMI15d + GMP + DT.h + PREC + PREC.k15d + GDD15d + NDVI15d                       | 2.764          | 0.015    | 0.638               | 0.75       |
| 26   | Growth Rate ~ Intercept + DMI15d + GMP + DT.h + PREC.k15d + T.night + NDVI15d                             | 2.827          | 0.015    | 0.652               | 0.75       |
| 27   | Growth Rate ~ Intercept + DMI15d + GMP + DT.h + T.k15d + T.night + GDD15d + NDVI15d                       | 3.196          | 0.012    | 0.664               | 0.75       |
| 28   | Growth Rate ~ Intercept + DMI15d + GMP + DT.h + PREC.k15d + T.k15d + T.sd15d + T.night + NDVI15d          | 3.214          | 0.012    | 0.675               | 0.75       |
| 29   | Growth Rate ~ Intercept + DMI15d + GMP + DT.h + PREC + T.sd15d + T.night + GDD15d + NDVI15d               | 3.233          | 0.012    | 0.687               | 0.75       |
| 30   | Growth Rate ~ Intercept + DMI15d + GMP + DT.h + PREC + T.night + GDD15d + NDVI15d                         | 3.350          | 0.011    | 0.697               | 0.75       |
| 31   | Growth Rate ~ Intercept + DMI15d + GMP + DT.h + PREC + PREC.k15d + T.k15d + T.sd15d + GDD15d + NDVI15d    | 3.416          | 0.011    | 0.708               | 0.75       |
| 32   | Growth Rate ~ Intercept + DMI15d + GMP + DT.h + T.k15d + GDD15d + NDVI15d                                 | 3.430          | 0.011    | 0.718               | 0.75       |
| 33   | Growth Rate ~ Intercept + DMI15d + GMP + DT.h + PREC + GDD15d + NDVI15d                                   | 3.506          | 0.011    | 0.728               | 0.75       |
| 34   | Growth Rate ~ Intercept + DMI15d + GMP + DT.h + T.sd15d + T.night + NDVI15d                               | 3.724          | 0.009    | 0.737               | 0.75       |

## 2010-2018

| Rank | Model                                                                                                            | $\Delta AIC_c$ | wAIC <sub>c</sub> | Cumulative wAIC <sub>c</sub> | $R_{LR}^2$ |
|------|------------------------------------------------------------------------------------------------------------------|----------------|-------------------|------------------------------|------------|
| 35   | Growth Rate ~ Intercept + DMI15d + GMP + DT.h + PREC + PREC.k15d + T.k15d + T.sd15d + T.night + GDD15d + NDVI15d | 3.756          | 0.009             | 0.746                        | 0.75       |
| 36   | Growth Rate ~ Intercept + DMI15d + GMP + DT.h + PREC + PREC.k15d + T.sd15d + T.night + NDVI15d                   | 3.839          | 0.009             | 0.754                        | 0.75       |
| 37   | Growth Rate ~ Intercept + DMI15d + GMP + DT.h + PREC.k15d + T.k15d + NDVI15d                                     | 3.999          | 0.008             | 0.762                        | 0.75       |
| 38   | Growth Rate ~ Intercept + DMI15d + GMP + DT.h + PREC + PREC.k15d + NDVI15d                                       | 4.067          | 0.008             | 0.770                        | 0.75       |
| 39   | Growth Rate ~ Intercept + DMI15d + GMP + DT.h + NDVI15d                                                          | 4.110          | 0.008             | 0.777                        | 0.75       |
| 40   | Growth Rate ~ Intercept + DMI15d + GMP + DT.h + PREC + PREC.k15d + T.k15d + T.sd15d + NDVI15d                    | 4.119          | 0.008             | 0.785                        | 0.75       |
| 41   | Growth Rate ~ Intercept + DMI15d + GMP + DT.h + T.k15d + T.sd15d + NDVI15d                                       | 4.152          | 0.008             | 0.792                        | 0.75       |
| 42   | Growth Rate ~ Intercept + DMI15d + GMP + DT.h + PREC + T.k15d + T.sd15d + GDD15d + NDVI15d                       | 4.294          | 0.007             | 0.799                        | 0.75       |
| 43   | Growth Rate ~ Intercept + GMP + DT.h + T.sd15d + NDVI15d                                                         | 4.323          | 0.007             | 0.805                        | 0.75       |
| 44   | Growth Rate ~ Intercept + DMI15d + GMP + DT.h + PREC + PREC.k15d + T.k15d + T.night + GDD15d + NDVI15d           | 4.328          | 0.007             | 0.812                        | 0.75       |
| 45   | Growth Rate ~ Intercept + DMI15d + GMP + DT.h + PREC + T.sd15d + NDVI15d                                         | 4.440          | 0.007             | 0.818                        | 0.75       |
| 46   | Growth Rate ~ Intercept + DMI15d + GMP + DT.h + PREC + T.k15d + T.sd15d + T.night + GDD15d + NDVI15d             | 4.578          | 0.006             | 0.824                        | 0.75       |
| 47   | Growth Rate ~ Intercept + DMI15d + GMP + DT.h + PREC + PREC.k15d + T.k15d + GDD15d + NDVI15d                     | 4.618          | 0.006             | 0.830                        | 0.75       |
| 48   | Growth Rate ~ Intercept + DMI15d + GMP + DT.h + PREC.k15d + T.k15d + T.night + NDVI15d                           | 4.648          | 0.006             | 0.835                        | 0.75       |
| 49   | Growth Rate ~ Intercept + DMI15d + GMP + DT.h + PREC + PREC.k15d + T.night + NDVI15d                             | 4.831          | 0.005             | 0.840                        | 0.75       |
| 50   | Growth Rate ~ Intercept + DMI15d + GMP + DT.h + T.night + NDVI15d                                                | 4.887          | 0.005             | 0.845                        | 0.75       |
| 51   | Growth Rate ~ Intercept + GMP + DT.h + T.sd15d + T.night + NDVI15d                                               | 4.921          | 0.005             | 0.850                        | 0.75       |
| 52   | Growth Rate ~ Intercept + GMP + DT.h + PREC.k15d + T.sd15d + NDVI15d                                             | 4.971          | 0.005             | 0.855                        | 0.75       |
| 53   | Growth Rate ~ Intercept + DMI15d + GMP + DT.h + PREC + T.k15d + T.night + GDD15d + NDVI15d                       | 5.083          | 0.005             | 0.860                        | 0.75       |
| 54   | Growth Rate ~ Intercept + DMI15d + GMP + DT.h + PREC + PREC.k15d + T.k15d + T.sd15d + T.night + NDVI15d          | 5.221          | 0.004             | 0.864                        | 0.75       |
| 55   | Growth Rate ~ Intercept + DMI15d + GMP + DT.h + T.k15d + T.sd15d + T.night + NDVI15d                             | 5.313          | 0.004             | 0.868                        | 0.75       |
| 56   | Growth Rate ~ Intercept + GMP + DT.h + PREC.k15d + T.sd15d + T.night + NDVI15d                                   | 5.372          | 0.004             | 0.872                        | 0.75       |
| 57   | Growth Rate ~ Intercept + GMP + DT.h + NDVI15d                                                                   | 5.379          | 0.004             | 0.876                        | 0.75       |
| 58   | Growth Rate ~ Intercept + DMI15d + GMP + DT.h + PREC + T.k15d + GDD15d + NDVI15d                                 | 5.431          | 0.004             | 0.880                        | 0.75       |
| 59   | Growth Rate ~ Intercept + GMP + DT.h + T.night + NDVI15d                                                         | 5.448          | 0.004             | 0.883                        | 0.75       |
| 60   | Growth Rate ~ Intercept + GMP + DT.h + T.night + GDD15d + NDVI15d                                                | 5.495          | 0.004             | 0.887                        | 0.75       |
| 61   | Growth Rate ~ Intercept + GMP + DT.h + T.sd15d + GDD15d + NDVI15d                                                | 5.617          | 0.004             | 0.891                        | 0.75       |
| 62   | Growth Rate ~ Intercept + GMP + DT.h + T.sd15d + T.night + GDD15d + NDVI15d                                      | 5.635          | 0.004             | 0.894                        | 0.75       |
| 63   | Growth Rate ~ Intercept + GMP + DT.h + PREC.k15d + T.night + NDVI15d                                             | 5.652          | 0.004             | 0.897                        | 0.75       |
| 64   | Growth Rate ~ Intercept + DMI15d + GMP + DT.h + PREC + T.sd15d + T.night + NDVI15d                               | 5.736          | 0.003             | 0.901                        | 0.75       |
| 65   | Growth Rate ~ Intercept + GMP + DT.h + T.k15d + T.sd15d + NDVI15d                                                | 5.761          | 0.003             | 0.904                        | 0.75       |
| 66   | Growth Rate ~ Intercept + GMP + DT.h + PREC.k15d + NDVI15d                                                       | 5.805          | 0.003             | 0.907                        | 0.75       |
| 67   | Growth Rate ~ Intercept + DMI15d + GMP + DT.h + PREC + PREC.k15d + T.k15d + NDVI15d                              | 6.004          | 0.003             | 0.910                        | 0.75       |
| 68   | Growth Rate ~ Intercept + GMP + DT.h + PREC + T.sd15d + NDVI15d                                                  | 6.065          | 0.003             | 0.913                        | 0.75       |
| 69   | Growth Rate ~ Intercept + DMI15d + GMP + DT.h + PREC + NDVI15d                                                   | 6.096          | 0.003             | 0.916                        | 0.75       |
| 70   | Growth Rate ~ Intercept + DMI15d + GMP + DT.h + T.k15d + NDVI15d                                                 | 6.107          | 0.003             | 0.918                        | 0.75       |
| 71   | Growth Rate ~ Intercept + DMI15d + GMP + DT.h + PREC + T.k15d + T.sd15d + NDVI15d                                | 6.148          | 0.003             | 0.921                        | 0.75       |
| 72   | Growth Rate ~ Intercept + GMP + DT.h + T.k15d + T.sd15d + T.night + NDVI15d                                      | 6.168          | 0.003             | 0.924                        | 0.75       |

## 2010-2018

| Rank | Model                                                                                         | $\Delta AIC_c$ | wAIC <sub>c</sub> | Cumulative wAIC <sub>c</sub> | $R_{LR}^2$ |
|------|-----------------------------------------------------------------------------------------------|----------------|-------------------|------------------------------|------------|
| 73   | Growth Rate ~ Intercept + GMP + DT.h + GDD15d + NDVI15d                                       | 6.191          | 0.003             | 0.926                        | 0.75       |
| 74   | Growth Rate ~ Intercept + GMP + DT.h + PREC.k15d + T.k15d + T.sd15d + NDVI15d                 | 6.202          | 0.003             | 0.929                        | 0.75       |
| 75   | Growth Rate ~ Intercept + GMP + DT.h + PREC.k15d + T.k15d + T.sd15d + T.night + NDVI15d       | 6.343          | 0.003             | 0.931                        | 0.75       |
| 76   | Growth Rate ~ Intercept + GMP + DT.h + PREC.k15d + T.night + GDD15d + NDVI15d                 | 6.574          | 0.002             | 0.933                        | 0.75       |
| 77   | Growth Rate ~ Intercept + GMP + DT.h + T.k15d + T.sd15d + T.night + GDD15d + NDVI15d          | 6.592          | 0.002             | 0.935                        | 0.75       |
| 78   | Growth Rate ~ Intercept + DMI15d + GMP + DT.h + PREC + PREC.k15d + T.k15d + T.night + NDVI15d | 6.655          | 0.002             | 0.938                        | 0.75       |
| 79   | Growth Rate ~ Intercept + GMP + DT.h + PREC + PREC.k15d + T.sd15d + NDVI15d                   | 6.670          | 0.002             | 0.940                        | 0.75       |
| 80   | Growth Rate ~ Intercept + GMP + DT.h + PREC.k15d + T.sd15d + GDD15d + NDVI15d                 | 6.715          | 0.002             | 0.942                        | 0.75       |
| 81   | Growth Rate ~ Intercept + GMP + DT.h + PREC.k15d + T.sd15d + T.night + GDD15d + NDVI15d       | 6.736          | 0.002             | 0.944                        | 0.75       |
| 82   | Growth Rate ~ Intercept + DMI15d + GMP + DT.h + T.k15d + T.night + NDVI15d                    | 6.819          | 0.002             | 0.945                        | 0.75       |
| 83   | Growth Rate ~ Intercept + GMP + DT.h + PREC + T.sd15d + T.night + NDVI15d                     | 6.833          | 0.002             | 0.947                        | 0.75       |
| 84   | Growth Rate ~ Intercept + DMI15d + GMP + DT.h + PREC + T.night + NDVI15d                      | 6.898          | 0.002             | 0.949                        | 0.75       |

2010

| Rank | Model                                                                                | $\Delta AIC_c$ | $wAIC_c$ | Cumulative $wAIC_c$ | $R_{LR}^2$ |
|------|--------------------------------------------------------------------------------------|----------------|----------|---------------------|------------|
| 1    | Growth Rate ~ Intercept + DMI15d + GMP + DT.h + PREC + T.night                       | 0.000          | 0.044    | 0.042               | 0.78       |
| 2    | Growth Rate ~ Intercept + DMI15d + GMP + DT.h + PREC + T.sd15d + T.night             | 0.347          | 0.037    | 0.077               | 0.78       |
| 3    | Growth Rate ~ Intercept + DMI15d + GMP + DT.h + T.night                              | 0.431          | 0.036    | 0.111               | 0.78       |
| 4    | Growth Rate ~ Intercept + GMP + DT.h + T.night                                       | 0.697          | 0.031    | 0.140               | 0.78       |
| 5    | Growth Rate ~ Intercept + GMP + DT.h + PREC + T.night                                | 0.756          | 0.030    | 0.169               | 0.78       |
| 6    | Growth Rate ~ Intercept + DMI15d + GMP + DT.h + T.sd15d + T.night                    | 1.158          | 0.025    | 0.192               | 0.78       |
| 7    | Growth Rate ~ Intercept + DMI15d + GMP + DT.h + PREC.k15d + T.night                  | 1.243          | 0.024    | 0.215               | 0.78       |
| 8    | Growth Rate ~ Intercept + GMP + DT.h + PREC + T.night + NDVI15d                      | 1.257          | 0.024    | 0.237               | 0.78       |
| 9    | Growth Rate ~ Intercept + DMI15d + GMP + DT.h + PREC + T.night + NDVI15d             | 1.263          | 0.023    | 0.259               | 0.78       |
| 10   | Growth Rate ~ Intercept + DMI15d + GMP + DT.h + PREC + PREC.k15d + T.night           | 1.437          | 0.021    | 0.280               | 0.78       |
| 11   | Growth Rate ~ Intercept + GMP + DT.h + T.night + NDVI15d                             | 1.442          | 0.021    | 0.300               | 0.78       |
| 12   | Growth Rate ~ Intercept + DMI15d + GMP + DT.h + PREC + T.night + GDD15d              | 1.586          | 0.020    | 0.319               | 0.78       |
| 13   | Growth Rate ~ Intercept + DMI15d + GMP + DT.h + PREC + T.sd15d + T.night + NDVI15d   | 1.632          | 0.019    | 0.337               | 0.78       |
| 14   | Growth Rate ~ Intercept + DMI15d + GMP + DT.h + PREC + T.sd15d + T.night + GDD15d    | 1.754          | 0.018    | 0.355               | 0.78       |
| 15   | Growth Rate ~ Intercept + DMI15d + GMP + DT.h + T.night + NDVI15d                    | 1.828          | 0.018    | 0.371               | 0.78       |
| 16   | Growth Rate ~ Intercept + DMI15d + GMP + DT.h + PREC + PREC.k15d + T.sd15d + T.night | 1.889          | 0.017    | 0.388               | 0.78       |
| 17   | Growth Rate ~ Intercept + DMI15d + GMP + DT.h + PREC.k15d + T.sd15d + T.night        | 2.042          | 0.016    | 0.403               | 0.78       |
| 18   | Growth Rate ~ Intercept + DMI15d + GMP + DT.h + T.night + GDD15d                     | 2.099          | 0.015    | 0.417               | 0.78       |
| 19   | Growth Rate ~ Intercept + DMI15d + GMP + DT.h + PREC + T.k15d + T.night              | 2.110          | 0.015    | 0.432               | 0.78       |
| 20   | Growth Rate ~ Intercept + GMP + DT.h + T.k15d + T.night                              | 2.366          | 0.014    | 0.445               | 0.78       |
| 21   | Growth Rate ~ Intercept + DMI15d + GMP + DT.h + T.k15d + T.night                     | 2.471          | 0.013    | 0.457               | 0.78       |
| 22   | Growth Rate ~ Intercept + DMI15d + GMP + DT.h + PREC + T.k15d + T.sd15d + T.night    | 2.479          | 0.013    | 0.469               | 0.78       |
| 23   | Growth Rate ~ Intercept + DMI15d + GMP + DT.h + T.sd15d + T.night + NDVI15d          | 2.590          | 0.012    | 0.480               | 0.78       |
| 24   | Growth Rate ~ Intercept + DMI15d + GMP + DT.h + PREC.k15d + T.night + NDVI15d        | 2.690          | 0.011    | 0.491               | 0.78       |
| 25   | Growth Rate ~ Intercept + GMP + DT.h + T.night + GDD15d                              | 2.707          | 0.011    | 0.502               | 0.78       |
| 26   | Growth Rate ~ Intercept + DMI15d + GMP + DT.h + T.sd15d + T.night + GDD15d           | 2.713          | 0.011    | 0.513               | 0.78       |
| 27   | Growth Rate ~ Intercept + GMP + DT.h + PREC + T.night + GDD15d                       | 2.755          | 0.011    | 0.523               | 0.78       |
| 28   | Growth Rate ~ Intercept + DMI15d + GMP + DT.h + PREC + PREC.k15d + T.night + NDVI15d | 2.756          | 0.011    | 0.534               | 0.78       |
| 29   | Growth Rate ~ Intercept + GMP + DT.h + PREC + T.k15d + T.night                       | 2.784          | 0.011    | 0.544               | 0.78       |
| 30   | Growth Rate ~ Intercept + GMP + DT.h + PREC.k15d + T.night                           | 2.799          | 0.011    | 0.555               | 0.78       |
| 31   | Growth Rate ~ Intercept + GMP + DT.h + T.sd15d + T.night                             | 2.816          | 0.011    | 0.565               | 0.78       |
| 32   | Growth Rate ~ Intercept + GMP + DT.h + PREC + PREC.k15d + T.night                    | 2.844          | 0.011    | 0.575               | 0.78       |
| 33   | Growth Rate ~ Intercept + DMI15d + GMP + DT.h + PREC + T.night + GDD15d + NDVI15d    | 2.866          | 0.011    | 0.585               | 0.78       |
| 34   | Growth Rate ~ Intercept + GMP + DT.h + PREC + T.sd15d + T.night                      | 2.885          | 0.010    | 0.595               | 0.78       |
| 35   | Growth Rate ~ Intercept + DMI15d + GMP + DT.h + T.k15d + T.sd15d + T.night           | 2.943          | 0.010    | 0.604               | 0.78       |
| 36   | Growth Rate ~ Intercept + DMI15d + GMP + DT.h + PREC.k15d + T.night + GDD15d         | 3.024          | 0.010    | 0.614               | 0.78       |

2010

| Rank | Model                                                                                                   | $\Delta AIC_c$ | wAIC <sub>c</sub> | Cumulative wAIC <sub>c</sub> | $R_{LR}^2$ |
|------|---------------------------------------------------------------------------------------------------------|----------------|-------------------|------------------------------|------------|
| 37   | Growth Rate ~ Intercept + DMI15d + GMP + DT.h + PREC + T.sd15d + T.night + GDD15d + NDVI15d             | 3.045          | 0.010             | 0.623                        | 0.79       |
| 38   | Growth Rate ~ Intercept + GMP + DT.h + T.k15d + T.night + NDVI15d                                       | 3.056          | 0.010             | 0.632                        | 0.78       |
| 39   | Growth Rate ~ Intercept + DMI15d + GMP + DT.h + PREC + PREC.k15d + T.night + GDD15d                     | 3.128          | 0.009             | 0.640                        | 0.78       |
| 40   | Growth Rate ~ Intercept + DMI15d + GMP + DT.h + PREC + PREC.k15d + T.sd15d + T.night + NDVI15d          | 3.224          | 0.009             | 0.649                        | 0.79       |
| 41   | Growth Rate ~ Intercept + DMI15d + GMP + DT.h + PREC.k15d + T.k15d + T.night                            | 3.257          | 0.009             | 0.657                        | 0.78       |
| 42   | Growth Rate ~ Intercept + GMP + DT.h + PREC + T.k15d + T.night + NDVI15d                                | 3.278          | 0.009             | 0.665                        | 0.78       |
| 43   | Growth Rate ~ Intercept + GMP + DT.h + PREC + T.night + GDD15d + NDVI15d                                | 3.348          | 0.008             | 0.673                        | 0.78       |
| 44   | Growth Rate ~ Intercept + GMP + DT.h + PREC + T.sd15d + T.night + NDVI15d                               | 3.372          | 0.008             | 0.681                        | 0.78       |
| 45   | Growth Rate ~ Intercept + GMP + DT.h + PREC + PREC.k15d + T.night + NDVI15d                             | 3.388          | 0.008             | 0.688                        | 0.78       |
| 46   | Growth Rate ~ Intercept + DMI15d + GMP + DT.h + PREC + T.k15d + T.night + NDVI15d                       | 3.405          | 0.008             | 0.696                        | 0.78       |
| 47   | Growth Rate ~ Intercept + DMI15d + GMP + DT.h + PREC + PREC.k15d + T.sd15d + T.night + GDD15d           | 3.419          | 0.008             | 0.704                        | 0.79       |
| 48   | Growth Rate ~ Intercept + GMP + DT.h + PREC.k15d + T.night + NDVI15d                                    | 3.510          | 0.008             | 0.711                        | 0.78       |
| 49   | Growth Rate ~ Intercept + DMI15d + GMP + DT.h + PREC.k15d + T.sd15d + T.night + NDVI15d                 | 3.518          | 0.008             | 0.718                        | 0.78       |
| 50   | Growth Rate ~ Intercept + DMI15d + GMP + DT.h + T.night + GDD15d + NDVI15d                              | 3.520          | 0.008             | 0.725                        | 0.78       |
| 51   | Growth Rate ~ Intercept + GMP + DT.h + T.night + GDD15d + NDVI15d                                       | 3.530          | 0.008             | 0.732                        | 0.78       |
| 52   | Growth Rate ~ Intercept + GMP + DT.h + T.sd15d + T.night + NDVI15d                                      | 3.552          | 0.007             | 0.739                        | 0.78       |
| 53   | Growth Rate ~ Intercept + DMI15d + GMP + DT.h + PREC + PREC.k15d + T.k15d + T.night                     | 3.580          | 0.007             | 0.746                        | 0.78       |
| 54   | Growth Rate ~ Intercept + DMI15d + GMP + DT.h + PREC + T.k15d + T.night + GDD15d                        | 3.601          | 0.007             | 0.753                        | 0.78       |
| 55   | Growth Rate ~ Intercept + DMI15d + GMP + DT.h + PREC.k15d + T.sd15d + T.night + GDD15d                  | 3.724          | 0.007             | 0.760                        | 0.78       |
| 56   | Growth Rate ~ Intercept + DMI15d + GMP + DT.h + PREC + T.k15d + T.sd15d + T.night + NDVI15d             | 3.747          | 0.007             | 0.766                        | 0.78       |
| 57   | Growth Rate ~ Intercept + DMI15d + GMP + DT.h + PREC.k15d + T.k15d + T.sd15d + T.night                  | 3.775          | 0.007             | 0.773                        | 0.78       |
| 58   | Growth Rate ~ Intercept + DMI15d + GMP + DT.h + T.k15d + T.night + NDVI15d                              | 3.820          | 0.007             | 0.779                        | 0.78       |
| 59   | Growth Rate ~ Intercept + DMI15d + GMP + DT.h + PREC + T.k15d + T.sd15d + T.night + GDD15d              | 3.910          | 0.006             | 0.785                        | 0.78       |
| 60   | Growth Rate ~ Intercept + DMI15d + GMP + DT.h + PREC + PREC.k15d + T.k15d + T.sd15d + T.night           | 4.003          | 0.006             | 0.790                        | 0.78       |
| 61   | Growth Rate ~ Intercept + DMI15d + GMP + DT.h + T.sd15d + T.night + GDD15d + NDVI15d                    | 4.163          | 0.005             | 0.795                        | 0.78       |
| 62   | Growth Rate ~ Intercept + DMI15d + GMP + DT.h + T.k15d + T.night + GDD15d                               | 4.215          | 0.005             | 0.801                        | 0.78       |
| 63   | Growth Rate ~ Intercept + DMI15d + GMP + DT.h + T.k15d + T.sd15d + T.night + NDVI15d                    | 4.277          | 0.005             | 0.806                        | 0.78       |
| 64   | Growth Rate ~ Intercept + GMP + DT.h + T.k15d + T.night + GDD15d                                        | 4.375          | 0.005             | 0.810                        | 0.78       |
| 65   | Growth Rate ~ Intercept + GMP + DT.h + PREC.k15d + T.k15d + T.night                                     | 4.433          | 0.005             | 0.815                        | 0.78       |
| 66   | Growth Rate ~ Intercept + GMP + DT.h + T.k15d + T.sd15d + T.night                                       | 4.446          | 0.005             | 0.819                        | 0.78       |
| 67   | Growth Rate ~ Intercept + DMI15d + GMP + DT.h + PREC + PREC.k15d + T.night + GDD15d + NDVI15d           | 4.458          | 0.005             | 0.824                        | 0.78       |
| 68   | Growth Rate ~ Intercept + DMI15d + GMP + DT.h + PREC.k15d + T.night + GDD15d + NDVI15d                  | 4.488          | 0.005             | 0.828                        | 0.78       |
| 69   | Growth Rate ~ Intercept + DMI15d + GMP + DT.h + PREC.k15d + T.k15d + T.night + NDVI15d                  | 4.648          | 0.004             | 0.832                        | 0.78       |
| 70   | Growth Rate ~ Intercept + DMI15d + GMP + DT.h + T.k15d + T.sd15d + T.night + GDD15d                     | 4.658          | 0.004             | 0.836                        | 0.78       |
| 71   | Growth Rate ~ Intercept + DMI15d + GMP + DT.h + PREC + PREC.k15d + T.sd15d + T.night + GDD15d + NDVI15d | 4.752          | 0.004             | 0.840                        | 0.79       |
| 72   | Growth Rate ~ Intercept + GMP + DT.h + PREC.k15d + T.night + GDD15d                                     | 4.763          | 0.004             | 0.844                        | 0.78       |

2010

| Rank | Model                                                                                                   | $\Delta AIC_c$ | wAIC <sub>c</sub> | Cumulative wAIC <sub>c</sub> | $R_{LR}^2$ |
|------|---------------------------------------------------------------------------------------------------------|----------------|-------------------|------------------------------|------------|
| 73   | Growth Rate ~ Intercept + GMP + DT.h + PREC + T.k15d + T.night + GDD15d                                 | 4.788          | 0.004             | 0.848                        | 0.78       |
| 74   | Growth Rate ~ Intercept + GMP + DT.h + T.sd15d + T.night + GDD15d                                       | 4.825          | 0.004             | 0.852                        | 0.78       |
| 75   | Growth Rate ~ Intercept + GMP + DT.h + PREC + T.sd15d + T.night + GDD15d                                | 4.880          | 0.004             | 0.855                        | 0.78       |
| 76   | Growth Rate ~ Intercept + GMP + DT.h + PREC + PREC.k15d + T.night + GDD15d                              | 4.889          | 0.004             | 0.859                        | 0.78       |
| 77   | Growth Rate ~ Intercept + GMP + DT.h + PREC + PREC.k15d + T.k15d + T.night                              | 4.907          | 0.004             | 0.863                        | 0.78       |
| 78   | Growth Rate ~ Intercept + GMP + DT.h + PREC + T.k15d + T.sd15d + T.night                                | 4.910          | 0.004             | 0.866                        | 0.78       |
| 79   | Growth Rate ~ Intercept + DMI15d + GMP + DT.h + PREC + PREC.k15d + T.k15d + T.night + NDVI15d           | 4.916          | 0.004             | 0.870                        | 0.78       |
| 80   | Growth Rate ~ Intercept + GMP + DT.h + PREC.k15d + T.sd15d + T.night                                    | 4.925          | 0.004             | 0.873                        | 0.78       |
| 81   | Growth Rate ~ Intercept + DMI15d + GMP + DT.h + PREC + T.k15d + T.night + GDD15d + NDVI15d              | 4.946          | 0.004             | 0.877                        | 0.78       |
| 82   | Growth Rate ~ Intercept + GMP + DT.h + PREC + PREC.k15d + T.sd15d + T.night                             | 4.977          | 0.004             | 0.880                        | 0.78       |
| 83   | Growth Rate ~ Intercept + GMP + DT.h + T.k15d + T.sd15d + T.night + NDVI15d                             | 5.041          | 0.004             | 0.884                        | 0.78       |
| 84   | Growth Rate ~ Intercept + GMP + DT.h + PREC.k15d + T.k15d + T.night + NDVI15d                           | 5.051          | 0.004             | 0.887                        | 0.78       |
| 85   | Growth Rate ~ Intercept + DMI15d + GMP + DT.h + PREC.k15d + T.k15d + T.night + GDD15d                   | 5.123          | 0.003             | 0.890                        | 0.78       |
| 86   | Growth Rate ~ Intercept + DMI15d + GMP + DT.h + PREC.k15d + T.k15d + T.sd15d + T.night + NDVI15d        | 5.149          | 0.003             | 0.893                        | 0.78       |
| 87   | Growth Rate ~ Intercept + GMP + DT.h + T.k15d + T.night + GDD15d + NDVI15d                              | 5.149          | 0.003             | 0.897                        | 0.78       |
| 88   | Growth Rate ~ Intercept + DMI15d + GMP + DT.h + PREC.k15d + T.sd15d + T.night + GDD15d + NDVI15d        | 5.213          | 0.003             | 0.900                        | 0.78       |
| 89   | Growth Rate ~ Intercept + DMI15d + GMP + DT.h + PREC + T.sd15d                                          | 5.213          | 0.003             | 0.903                        | 0.78       |
| 90   | Growth Rate ~ Intercept + DMI15d + GMP + DT.h + PREC + T.k15d + T.sd15d + T.night + GDD15d + NDVI15d    | 5.215          | 0.003             | 0.906                        | 0.79       |
| 91   | Growth Rate ~ Intercept + DMI15d + GMP + DT.h + PREC + PREC.k15d + T.k15d + T.night + GDD15d            | 5.219          | 0.003             | 0.909                        | 0.78       |
| 92   | Growth Rate ~ Intercept + DMI15d + GMP + DT.h + PREC + PREC.k15d + T.k15d + T.sd15d + T.night + NDVI15d | 5.310          | 0.003             | 0.912                        | 0.79       |
| 93   | Growth Rate ~ Intercept + GMP + DT.h + PREC + T.k15d + T.sd15d + T.night + NDVI15d                      | 5.344          | 0.003             | 0.915                        | 0.78       |
| 94   | Growth Rate ~ Intercept + GMP + DT.h + PREC + T.k15d + T.night + GDD15d + NDVI15d                       | 5.377          | 0.003             | 0.918                        | 0.78       |
| 95   | Growth Rate ~ Intercept + GMP + DT.h + PREC + PREC.k15d + T.k15d + T.night + NDVI15d                    | 5.428          | 0.003             | 0.920                        | 0.78       |
| 96   | Growth Rate ~ Intercept + GMP + DT.h + PREC + T.sd15d + T.night + GDD15d + NDVI15d                      | 5.444          | 0.003             | 0.923                        | 0.78       |
| 97   | Growth Rate ~ Intercept + DMI15d + GMP + DT.h + PREC + T.sd15d + GDD15d                                 | 5.458          | 0.003             | 0.926                        | 0.78       |
| 98   | Growth Rate ~ Intercept + GMP + DT.h + PREC + PREC.k15d + T.sd15d + T.night + NDVI15d                   | 5.496          | 0.003             | 0.928                        | 0.78       |
| 99   | Growth Rate ~ Intercept + GMP + DT.h + PREC + PREC.k15d + T.night + GDD15d + NDVI15d                    | 5.498          | 0.003             | 0.931                        | 0.78       |
| 100  | Growth Rate ~ Intercept + GMP + DT.h + PREC.k15d + T.night + GDD15d + NDVI15d                           | 5.554          | 0.003             | 0.934                        | 0.78       |
| 101  | Growth Rate ~ Intercept + DMI15d + GMP + DT.h + PREC + PREC.k15d + T.k15d + T.sd15d + T.night + GDD15d  | 5.589          | 0.003             | 0.936                        | 0.79       |
| 102  | Growth Rate ~ Intercept + DMI15d + GMP + DT.h + T.k15d + T.night + GDD15d + NDVI15d                     | 5.610          | 0.003             | 0.939                        | 0.78       |
| 103  | Growth Rate ~ Intercept + DMI15d + GMP + DT.h + PREC.k15d + T.k15d + T.sd15d + T.night + GDD15d         | 5.620          | 0.003             | 0.941                        | 0.78       |
| 104  | Growth Rate ~ Intercept + GMP + DT.h + T.sd15d + T.night + GDD15d + NDVI15d                             | 5.627          | 0.003             | 0.944                        | 0.78       |
| 105  | Growth Rate ~ Intercept + GMP + DT.h + PREC.k15d + T.sd15d + T.night + NDVI15d                          | 5.646          | 0.003             | 0.946                        | 0.78       |
| 106  | Growth Rate ~ Intercept + DMI15d + GMP + DT.h + T.k15d + T.sd15d + T.night + GDD15d + NDVI15d           | 6.031          | 0.002             | 0.948                        | 0.78       |

2011

| Rank | Model                                                                                 | $\Delta AIC_c$ | $wAIC_c$ | Cumulative $wAIC_c$ | $R_{LR}^2$ |
|------|---------------------------------------------------------------------------------------|----------------|----------|---------------------|------------|
| 1    | Growth Rate ~ Intercept + GMP + DT.h + GDD15d                                         | 0.000          | 0.039    | 0.037               | 0.70       |
| 2    | Growth Rate ~ Intercept + GMP + DT.h + T.night + GDD15d                               | 0.267          | 0.034    | 0.070               | 0.70       |
| 3    | Growth Rate ~ Intercept + GMP + DT.h + T.k15d + GDD15d                                | 0.293          | 0.034    | 0.102               | 0.70       |
| 4    | Growth Rate ~ Intercept + GMP + DT.h + PREC.k15d + T.k15d + GDD15d                    | 0.368          | 0.033    | 0.133               | 0.70       |
| 5    | Growth Rate ~ Intercept + GMP + DT.h + T.k15d + T.night + GDD15d                      | 0.739          | 0.027    | 0.159               | 0.70       |
| 6    | Growth Rate ~ Intercept + GMP + DT.h + PREC.k15d + GDD15d                             | 0.917          | 0.025    | 0.183               | 0.70       |
| 7    | Growth Rate ~ Intercept + GMP + DT.h + PREC.k15d + T.k15d + T.night + GDD15d          | 1.342          | 0.020    | 0.202               | 0.70       |
| 8    | Growth Rate ~ Intercept + DMI15d + GMP + DT.h + T.night + GDD15d                      | 1.527          | 0.018    | 0.219               | 0.70       |
| 9    | Growth Rate ~ Intercept + GMP + DT.h + PREC.k15d + T.night + GDD15d                   | 1.581          | 0.018    | 0.236               | 0.70       |
| 10   | Growth Rate ~ Intercept + GMP + DT.h + PREC + GDD15d                                  | 1.596          | 0.018    | 0.253               | 0.70       |
| 11   | Growth Rate ~ Intercept + DMI15d + GMP + DT.h + PREC.k15d + GDD15d                    | 1.625          | 0.017    | 0.269               | 0.70       |
| 12   | Growth Rate ~ Intercept + DMI15d + GMP + DT.h + PREC.k15d + T.night + GDD15d          | 1.699          | 0.017    | 0.285               | 0.70       |
| 13   | Growth Rate ~ Intercept + DMI15d + GMP + DT.h + GDD15d                                | 1.741          | 0.016    | 0.301               | 0.70       |
| 14   | Growth Rate ~ Intercept + DMI15d + GMP + DT.h + PREC.k15d + T.k15d + GDD15d           | 1.816          | 0.016    | 0.316               | 0.70       |
| 15   | Growth Rate ~ Intercept + GMP + DT.h + PREC + T.k15d + GDD15d                         | 1.838          | 0.016    | 0.331               | 0.70       |
| 16   | Growth Rate ~ Intercept + GMP + DT.h + T.sd15d + GDD15d                               | 1.870          | 0.015    | 0.345               | 0.70       |
| 17   | Growth Rate ~ Intercept + GMP + DT.h + GDD15d + NDVI15d                               | 2.083          | 0.014    | 0.358               | 0.70       |
| 18   | Growth Rate ~ Intercept + GMP + DT.h + PREC.k15d + T.k15d + T.sd15d + GDD15d          | 2.280          | 0.013    | 0.370               | 0.70       |
| 19   | Growth Rate ~ Intercept + GMP + DT.h + PREC + T.night + GDD15d                        | 2.283          | 0.013    | 0.382               | 0.70       |
| 20   | Growth Rate ~ Intercept + GMP + DT.h + PREC + PREC.k15d + T.k15d + GDD15d             | 2.306          | 0.012    | 0.394               | 0.70       |
| 21   | Growth Rate ~ Intercept + GMP + DT.h + T.sd15d + T.night + GDD15d                     | 2.328          | 0.012    | 0.406               | 0.70       |
| 22   | Growth Rate ~ Intercept + DMI15d + GMP + DT.h + T.k15d + GDD15d                       | 2.357          | 0.012    | 0.417               | 0.70       |
| 23   | Growth Rate ~ Intercept + GMP + DT.h + T.night + GDD15d + NDVI15d                     | 2.360          | 0.012    | 0.429               | 0.70       |
| 24   | Growth Rate ~ Intercept + GMP + DT.h + PREC.k15d + T.sd15d + GDD15d                   | 2.361          | 0.012    | 0.440               | 0.70       |
| 25   | Growth Rate ~ Intercept + GMP + DT.h + T.k15d + GDD15d + NDVI15d                      | 2.362          | 0.012    | 0.452               | 0.70       |
| 26   | Growth Rate ~ Intercept + DMI15d + GMP + DT.h + PREC.k15d + T.k15d + T.night + GDD15d | 2.363          | 0.012    | 0.463               | 0.71       |
| 27   | Growth Rate ~ Intercept + GMP + DT.h + T.k15d + T.sd15d + GDD15d                      | 2.382          | 0.012    | 0.474               | 0.70       |
| 28   | Growth Rate ~ Intercept + GMP + DT.h + PREC.k15d + T.k15d + GDD15d + NDVI15d          | 2.414          | 0.012    | 0.485               | 0.70       |
| 29   | Growth Rate ~ Intercept + DMI15d + GMP + DT.h + T.k15d + T.night + GDD15d             | 2.572          | 0.011    | 0.496               | 0.70       |
| 30   | Growth Rate ~ Intercept + GMP + DT.h + PREC + T.k15d + T.night + GDD15d               | 2.724          | 0.010    | 0.505               | 0.70       |
| 31   | Growth Rate ~ Intercept + GMP + DT.h + PREC + PREC.k15d + GDD15d                      | 2.810          | 0.010    | 0.515               | 0.70       |
| 32   | Growth Rate ~ Intercept + GMP + DT.h + T.k15d + T.sd15d + T.night + GDD15d            | 2.812          | 0.010    | 0.524               | 0.70       |
| 33   | Growth Rate ~ Intercept + GMP + DT.h + T.k15d + T.night + GDD15d + NDVI15d            | 2.843          | 0.009    | 0.533               | 0.70       |
| 34   | Growth Rate ~ Intercept + DMI15d + GMP + DT.h + PREC + GDD15d                         | 2.914          | 0.009    | 0.541               | 0.70       |
| 35   | Growth Rate ~ Intercept + GMP + DT.h + PREC.k15d + GDD15d + NDVI15d                   | 3.000          | 0.009    | 0.550               | 0.70       |
| 36   | Growth Rate ~ Intercept + DMI15d + GMP + DT.h + PREC.k15d + T.sd15d + GDD15d          | 3.018          | 0.009    | 0.558               | 0.70       |
| 37   | Growth Rate ~ Intercept + DMI15d + GMP + DT.h + PREC + PREC.k15d + GDD15d             | 3.094          | 0.008    | 0.566               | 0.70       |

2011

| Rank | Model                                                                                        | $\Delta AIC_c$ | wAIC <sub>c</sub> | Cumulative wAIC <sub>c</sub> | $R_{LR}^2$ |
|------|----------------------------------------------------------------------------------------------|----------------|-------------------|------------------------------|------------|
| 38   | Growth Rate ~ Intercept + GMP + DT.h + T.night                                               | 3.277          | 0.008             | 0.573                        | 0.70       |
| 39   | Growth Rate ~ Intercept + DMI15d + GMP + DT.h + PREC + T.night + GDD15d                      | 3.299          | 0.008             | 0.580                        | 0.70       |
| 40   | Growth Rate ~ Intercept + GMP + DT.h + PREC.k15d + T.night                                   | 3.370          | 0.007             | 0.587                        | 0.70       |
| 41   | Growth Rate ~ Intercept + GMP + DT.h + PREC.k15d + T.k15d + T.sd15d + T.night + GDD15d       | 3.427          | 0.007             | 0.594                        | 0.70       |
| 42   | Growth Rate ~ Intercept + GMP + DT.h + PREC.k15d + T.sd15d + T.night + GDD15d                | 3.427          | 0.007             | 0.601                        | 0.70       |
| 43   | Growth Rate ~ Intercept + GMP + DT.h + PREC.k15d + T.k15d + T.night + GDD15d + NDVI15d       | 3.442          | 0.007             | 0.607                        | 0.70       |
| 44   | Growth Rate ~ Intercept + GMP + DT.h + PREC + PREC.k15d + T.k15d + T.night + GDD15d          | 3.446          | 0.007             | 0.614                        | 0.70       |
| 45   | Growth Rate ~ Intercept + DMI15d + GMP + DT.h + PREC + PREC.k15d + T.k15d + GDD15d           | 3.489          | 0.007             | 0.620                        | 0.70       |
| 46   | Growth Rate ~ Intercept + GMP + DT.h + PREC + T.sd15d + GDD15d                               | 3.519          | 0.007             | 0.627                        | 0.70       |
| 47   | Growth Rate ~ Intercept + DMI15d + GMP + DT.h + PREC.k15d + T.sd15d + T.night + GDD15d       | 3.578          | 0.007             | 0.633                        | 0.70       |
| 48   | Growth Rate ~ Intercept + DMI15d + GMP + DT.h + PREC + PREC.k15d + T.night + GDD15d          | 3.616          | 0.006             | 0.639                        | 0.70       |
| 49   | Growth Rate ~ Intercept + DMI15d + GMP + DT.h + T.night + GDD15d + NDVI15d                   | 3.623          | 0.006             | 0.645                        | 0.70       |
| 50   | Growth Rate ~ Intercept + DMI15d + GMP + DT.h + T.sd15d + T.night + GDD15d                   | 3.630          | 0.006             | 0.651                        | 0.70       |
| 51   | Growth Rate ~ Intercept + DMI15d + GMP + DT.h + PREC.k15d + T.k15d + T.sd15d + GDD15d        | 3.660          | 0.006             | 0.657                        | 0.70       |
| 52   | Growth Rate ~ Intercept + DMI15d + GMP + DT.h + T.sd15d + GDD15d                             | 3.668          | 0.006             | 0.663                        | 0.70       |
| 53   | Growth Rate ~ Intercept + GMP + DT.h + PREC + PREC.k15d + T.night + GDD15d                   | 3.676          | 0.006             | 0.669                        | 0.70       |
| 54   | Growth Rate ~ Intercept + GMP + DT.h + PREC.k15d + T.night + GDD15d + NDVI15d                | 3.686          | 0.006             | 0.675                        | 0.70       |
| 55   | Growth Rate ~ Intercept + GMP + DT.h + PREC + GDD15d + NDVI15d                               | 3.690          | 0.006             | 0.681                        | 0.70       |
| 56   | Growth Rate ~ Intercept + DMI15d + GMP + DT.h + PREC.k15d + GDD15d + NDVI15d                 | 3.715          | 0.006             | 0.687                        | 0.70       |
| 57   | Growth Rate ~ Intercept + DMI15d + GMP + DT.h + PREC + T.k15d + GDD15d                       | 3.721          | 0.006             | 0.693                        | 0.70       |
| 58   | Growth Rate ~ Intercept + DMI15d + GMP + DT.h + PREC.k15d + T.night + GDD15d + NDVI15d       | 3.810          | 0.006             | 0.698                        | 0.70       |
| 59   | Growth Rate ~ Intercept + DMI15d + GMP + DT.h + GDD15d + NDVI15d                             | 3.834          | 0.006             | 0.704                        | 0.70       |
| 60   | Growth Rate ~ Intercept + DMI15d + GMP + DT.h + PREC.k15d + T.k15d + GDD15d + NDVI15d        | 3.875          | 0.006             | 0.709                        | 0.70       |
| 61   | Growth Rate ~ Intercept + GMP + DT.h + PREC + T.k15d + GDD15d + NDVI15d                      | 3.922          | 0.006             | 0.714                        | 0.70       |
| 62   | Growth Rate ~ Intercept + GMP + DT.h + PREC + T.k15d + T.sd15d + GDD15d                      | 3.943          | 0.005             | 0.720                        | 0.70       |
| 63   | Growth Rate ~ Intercept + GMP + DT.h + T.sd15d + GDD15d + NDVI15d                            | 3.967          | 0.005             | 0.725                        | 0.70       |
| 64   | Growth Rate ~ Intercept + GMP + DT.h + T.sd15d + T.night                                     | 4.056          | 0.005             | 0.730                        | 0.70       |
| 65   | Growth Rate ~ Intercept + GMP + DT.h + PREC + PREC.k15d + T.k15d + T.sd15d + GDD15d          | 4.275          | 0.005             | 0.734                        | 0.70       |
| 66   | Growth Rate ~ Intercept + GMP + DT.h + PREC.k15d                                             | 4.304          | 0.005             | 0.738                        | 0.70       |
| 67   | Growth Rate ~ Intercept + GMP + DT.h + PREC + T.sd15d + T.night + GDD15d                     | 4.353          | 0.004             | 0.743                        | 0.70       |
| 68   | Growth Rate ~ Intercept + DMI15d + GMP + DT.h + PREC + PREC.k15d + T.k15d + T.night + GDD15d | 4.355          | 0.004             | 0.747                        | 0.71       |
| 69   | Growth Rate ~ Intercept + GMP + DT.h + PREC + PREC.k15d + T.sd15d + GDD15d                   | 4.357          | 0.004             | 0.751                        | 0.70       |
| 70   | Growth Rate ~ Intercept + GMP + DT.h + PREC.k15d + T.k15d + T.sd15d + GDD15d + NDVI15d       | 4.362          | 0.004             | 0.755                        | 0.70       |
| 71   | Growth Rate ~ Intercept + GMP + DT.h + PREC + PREC.k15d + T.k15d + GDD15d + NDVI15d          | 4.368          | 0.004             | 0.759                        | 0.70       |
| 72   | Growth Rate ~ Intercept + GMP + DT.h + PREC + T.night + GDD15d + NDVI15d                     | 4.385          | 0.004             | 0.764                        | 0.70       |
| 73   | Growth Rate ~ Intercept + DMI15d + GMP + DT.h + PREC + T.k15d + T.night + GDD15d             | 4.413          | 0.004             | 0.768                        | 0.70       |
| 74   | Growth Rate ~ Intercept + GMP + DT.h + T.sd15d + T.night + GDD15d + NDVI15d                  | 4.425          | 0.004             | 0.772                        | 0.70       |



2011

| Rank | Model                                                                                            | $\Delta AIC_c$ | wAIC <sub>c</sub> | Cumulative wAIC <sub>c</sub> | $R_{LR}^2$ |
|------|--------------------------------------------------------------------------------------------------|----------------|-------------------|------------------------------|------------|
| 75   | Growth Rate ~ Intercept + DMI15d + GMP + DT.h + T.k15d + GDD15d + NDVI15d                        | 4.435          | 0.004             | 0.776                        | 0.70       |
| 76   | Growth Rate ~ Intercept + DMI15d + GMP + DT.h + PREC.k15d + T.k15d + T.sd15d + T.night + GDD15d  | 4.436          | 0.004             | 0.780                        | 0.71       |
| 77   | Growth Rate ~ Intercept + DMI15d + GMP + DT.h + T.k15d + T.sd15d + GDD15d                        | 4.454          | 0.004             | 0.784                        | 0.70       |
| 78   | Growth Rate ~ Intercept + GMP + DT.h + T.k15d + T.sd15d + GDD15d + NDVI15d                       | 4.463          | 0.004             | 0.788                        | 0.70       |
| 79   | Growth Rate ~ Intercept + GMP + DT.h + PREC.k15d + T.sd15d + GDD15d + NDVI15d                    | 4.466          | 0.004             | 0.792                        | 0.70       |
| 80   | Growth Rate ~ Intercept + DMI15d + GMP + DT.h + PREC.k15d + T.k15d + T.night + GDD15d + NDVI15d  | 4.479          | 0.004             | 0.796                        | 0.71       |
| 81   | Growth Rate ~ Intercept + DMI15d + GMP + DT.h + T.k15d + T.sd15d + T.night + GDD15d              | 4.641          | 0.004             | 0.800                        | 0.70       |
| 82   | Growth Rate ~ Intercept + DMI15d + GMP + DT.h + PREC + PREC.k15d + T.sd15d + GDD15d              | 4.675          | 0.004             | 0.803                        | 0.70       |
| 83   | Growth Rate ~ Intercept + DMI15d + GMP + DT.h + T.k15d + T.night + GDD15d + NDVI15d              | 4.685          | 0.004             | 0.807                        | 0.70       |
| 84   | Growth Rate ~ Intercept + GMP + DT.h + PREC + T.k15d + T.sd15d + T.night + GDD15d                | 4.802          | 0.004             | 0.810                        | 0.70       |
| 85   | Growth Rate ~ Intercept + GMP + DT.h + PREC + T.k15d + T.night + GDD15d + NDVI15d                | 4.836          | 0.003             | 0.813                        | 0.70       |
| 86   | Growth Rate ~ Intercept + GMP + DT.h + PREC + PREC.k15d + GDD15d + NDVI15d                       | 4.906          | 0.003             | 0.817                        | 0.70       |
| 87   | Growth Rate ~ Intercept + GMP + DT.h + PREC.k15d + T.k15d + T.night                              | 4.907          | 0.003             | 0.820                        | 0.70       |
| 88   | Growth Rate ~ Intercept + GMP + DT.h + T.k15d + T.sd15d + T.night + GDD15d + NDVI15d             | 4.923          | 0.003             | 0.823                        | 0.70       |
| 89   | Growth Rate ~ Intercept + DMI15d + GMP + DT.h + PREC + T.sd15d + GDD15d                          | 4.927          | 0.003             | 0.826                        | 0.70       |
| 90   | Growth Rate ~ Intercept + GMP + DT.h + T.night + NDVI15d                                         | 4.976          | 0.003             | 0.829                        | 0.70       |
| 91   | Growth Rate ~ Intercept + DMI15d + GMP + DT.h + PREC + GDD15d + NDVI15d                          | 5.018          | 0.003             | 0.832                        | 0.70       |
| 92   | Growth Rate ~ Intercept + GMP + DT.h + PREC.k15d + T.sd15d + T.night                             | 5.070          | 0.003             | 0.835                        | 0.70       |
| 93   | Growth Rate ~ Intercept + DMI15d + GMP + DT.h + PREC.k15d + T.sd15d + GDD15d + NDVI15d           | 5.131          | 0.003             | 0.838                        | 0.70       |
| 94   | Growth Rate ~ Intercept + DMI15d + GMP + DT.h + PREC + PREC.k15d + GDD15d + NDVI15d              | 5.199          | 0.003             | 0.841                        | 0.70       |
| 95   | Growth Rate ~ Intercept + DMI15d + GMP + DT.h + PREC.k15d + T.night                              | 5.228          | 0.003             | 0.844                        | 0.70       |
| 96   | Growth Rate ~ Intercept + GMP + DT.h + PREC.k15d + T.night + NDVI15d                             | 5.248          | 0.003             | 0.846                        | 0.70       |
| 97   | Growth Rate ~ Intercept + GMP + DT.h + PREC + T.night                                            | 5.286          | 0.003             | 0.849                        | 0.70       |
| 98   | Growth Rate ~ Intercept + GMP + DT.h + T.k15d + T.night                                          | 5.296          | 0.003             | 0.852                        | 0.70       |
| 99   | Growth Rate ~ Intercept + DMI15d + GMP + DT.h + T.night                                          | 5.312          | 0.003             | 0.854                        | 0.70       |
| 100  | Growth Rate ~ Intercept + GMP + DT.h + T.k15d + T.sd15d + T.night                                | 5.394          | 0.003             | 0.857                        | 0.70       |
| 101  | Growth Rate ~ Intercept + DMI15d + GMP + DT.h + PREC + T.night + GDD15d + NDVI15d                | 5.402          | 0.003             | 0.859                        | 0.70       |
| 102  | Growth Rate ~ Intercept + DMI15d + GMP + DT.h + PREC + T.sd15d + T.night + GDD15d                | 5.412          | 0.003             | 0.862                        | 0.70       |
| 103  | Growth Rate ~ Intercept + DMI15d + GMP + DT.h + PREC + PREC.k15d + T.k15d + T.sd15d + GDD15d     | 5.424          | 0.003             | 0.864                        | 0.70       |
| 104  | Growth Rate ~ Intercept + GMP + DT.h + PREC + PREC.k15d + T.night                                | 5.467          | 0.003             | 0.867                        | 0.70       |
| 105  | Growth Rate ~ Intercept + GMP + DT.h + PREC.k15d + T.sd15d + T.night + GDD15d + NDVI15d          | 5.535          | 0.002             | 0.869                        | 0.70       |
| 106  | Growth Rate ~ Intercept + GMP + DT.h + PREC + PREC.k15d + T.sd15d + T.night + GDD15d             | 5.537          | 0.002             | 0.871                        | 0.70       |
| 107  | Growth Rate ~ Intercept + GMP + DT.h + PREC.k15d + T.k15d + T.sd15d + T.night + GDD15d + NDVI15d | 5.539          | 0.002             | 0.874                        | 0.70       |
| 108  | Growth Rate ~ Intercept + DMI15d + GMP + DT.h + PREC + PREC.k15d + T.sd15d + T.night + GDD15d    | 5.540          | 0.002             | 0.876                        | 0.70       |
| 109  | Growth Rate ~ Intercept + GMP + DT.h + PREC + PREC.k15d + T.k15d + T.sd15d + T.night + GDD15d    | 5.540          | 0.002             | 0.878                        | 0.70       |
| 110  | Growth Rate ~ Intercept + GMP + DT.h + PREC + PREC.k15d + T.k15d + T.night + GDD15d + NDVI15d    | 5.554          | 0.002             | 0.881                        | 0.70       |
| 111  | Growth Rate ~ Intercept + DMI15d + GMP + DT.h + PREC + PREC.k15d + T.k15d + GDD15d + NDVI15d     | 5.571          | 0.002             | 0.883                        | 0.70       |

2011

| Rank | Model                                                                                                     | $\Delta AIC_c$ | wAIC <sub>c</sub> | Cumulative wAIC <sub>c</sub> | $R_{LR}^2$ |
|------|-----------------------------------------------------------------------------------------------------------|----------------|-------------------|------------------------------|------------|
| 112  | Growth Rate ~ Intercept + GMP + DT.h + PREC + T.sd15d + GDD15d + NDVI15d                                  | 5.624          | 0.002             | 0.885                        | 0.70       |
| 113  | Growth Rate ~ Intercept + GMP + DT.h                                                                      | 5.682          | 0.002             | 0.887                        | 0.70       |
| 114  | Growth Rate ~ Intercept + DMI15d + GMP + DT.h + PREC.k15d + T.sd15d + T.night + GDD15d + NDVI15d          | 5.690          | 0.002             | 0.890                        | 0.70       |
| 115  | Growth Rate ~ Intercept + DMI15d + GMP + DT.h + T.sd15d + T.night + GDD15d + NDVI15d                      | 5.732          | 0.002             | 0.892                        | 0.70       |
| 116  | Growth Rate ~ Intercept + DMI15d + GMP + DT.h + PREC + PREC.k15d + T.night + GDD15d + NDVI15d             | 5.735          | 0.002             | 0.894                        | 0.70       |
| 117  | Growth Rate ~ Intercept + DMI15d + GMP + DT.h + PREC.k15d + T.k15d + T.sd15d + GDD15d + NDVI15d           | 5.758          | 0.002             | 0.896                        | 0.70       |
| 118  | Growth Rate ~ Intercept + DMI15d + GMP + DT.h + T.sd15d + GDD15d + NDVI15d                                | 5.773          | 0.002             | 0.898                        | 0.70       |
| 119  | Growth Rate ~ Intercept + GMP + DT.h + PREC + PREC.k15d + T.night + GDD15d + NDVI15d                      | 5.789          | 0.002             | 0.900                        | 0.70       |
| 120  | Growth Rate ~ Intercept + DMI15d + GMP + DT.h + PREC + T.k15d + GDD15d + NDVI15d                          | 5.819          | 0.002             | 0.902                        | 0.70       |
| 121  | Growth Rate ~ Intercept + DMI15d + GMP + DT.h + PREC + T.k15d + T.sd15d + GDD15d                          | 5.834          | 0.002             | 0.904                        | 0.70       |
| 122  | Growth Rate ~ Intercept + GMP + DT.h + PREC.k15d + T.k15d                                                 | 5.857          | 0.002             | 0.906                        | 0.70       |
| 123  | Growth Rate ~ Intercept + GMP + DT.h + T.sd15d + T.night + NDVI15d                                        | 6.024          | 0.002             | 0.908                        | 0.70       |
| 124  | Growth Rate ~ Intercept + GMP + DT.h + PREC + T.k15d + T.sd15d + GDD15d + NDVI15d                         | 6.035          | 0.002             | 0.910                        | 0.70       |
| 125  | Growth Rate ~ Intercept + GMP + DT.h + PREC.k15d + T.k15d + T.sd15d + T.night                             | 6.061          | 0.002             | 0.912                        | 0.70       |
| 126  | Growth Rate ~ Intercept + GMP + DT.h + PREC + T.sd15d + T.night                                           | 6.066          | 0.002             | 0.913                        | 0.70       |
| 127  | Growth Rate ~ Intercept + DMI15d + GMP + DT.h + T.sd15d + T.night                                         | 6.110          | 0.002             | 0.915                        | 0.70       |
| 128  | Growth Rate ~ Intercept + GMP + DT.h + PREC + PREC.k15d                                                   | 6.134          | 0.002             | 0.917                        | 0.70       |
| 129  | Growth Rate ~ Intercept + GMP + DT.h + PREC.k15d + T.sd15d                                                | 6.196          | 0.002             | 0.919                        | 0.70       |
| 130  | Growth Rate ~ Intercept + GMP + DT.h + PREC.k15d + NDVI15d                                                | 6.273          | 0.002             | 0.920                        | 0.70       |
| 131  | Growth Rate ~ Intercept + GMP + DT.h + PREC + PREC.k15d + T.k15d + T.sd15d + GDD15d + NDVI15d             | 6.367          | 0.002             | 0.922                        | 0.70       |
| 132  | Growth Rate ~ Intercept + DMI15d + GMP + DT.h + PREC.k15d                                                 | 6.394          | 0.002             | 0.923                        | 0.70       |
| 133  | Growth Rate ~ Intercept + DMI15d + GMP + DT.h + PREC + PREC.k15d + T.k15d + T.sd15d + T.night + GDD15d    | 6.448          | 0.002             | 0.925                        | 0.71       |
| 134  | Growth Rate ~ Intercept + GMP + DT.h + PREC + T.sd15d + T.night + GDD15d + NDVI15d                        | 6.458          | 0.002             | 0.926                        | 0.70       |
| 135  | Growth Rate ~ Intercept + GMP + DT.h + PREC + PREC.k15d + T.sd15d + GDD15d + NDVI15d                      | 6.470          | 0.002             | 0.928                        | 0.70       |
| 136  | Growth Rate ~ Intercept + GMP + DT.h + T.sd15d                                                            | 6.479          | 0.002             | 0.929                        | 0.70       |
| 137  | Growth Rate ~ Intercept + DMI15d + GMP + DT.h + PREC + PREC.k15d + T.k15d + T.night + GDD15d + NDVI15d    | 6.479          | 0.002             | 0.931                        | 0.71       |
| 138  | Growth Rate ~ Intercept + DMI15d + GMP + DT.h + PREC + T.k15d + T.sd15d + T.night + GDD15d                | 6.479          | 0.002             | 0.932                        | 0.70       |
| 139  | Growth Rate ~ Intercept + DMI15d + GMP + DT.h + PREC + T.k15d + T.night + GDD15d + NDVI15d                | 6.534          | 0.001             | 0.933                        | 0.70       |
| 140  | Growth Rate ~ Intercept + DMI15d + GMP + DT.h + T.k15d + T.sd15d + GDD15d + NDVI15d                       | 6.544          | 0.001             | 0.935                        | 0.70       |
| 141  | Growth Rate ~ Intercept + DMI15d + GMP + DT.h + PREC.k15d + T.k15d + T.sd15d + T.night + GDD15d + NDVI15d | 6.563          | 0.001             | 0.936                        | 0.71       |
| 142  | Growth Rate ~ Intercept + DMI15d + GMP + DT.h + PREC.k15d + T.sd15d + T.night                             | 6.751          | 0.001             | 0.938                        | 0.70       |
| 143  | Growth Rate ~ Intercept + DMI15d + GMP + DT.h + T.k15d + T.sd15d + T.night + GDD15d + NDVI15d             | 6.762          | 0.001             | 0.939                        | 0.70       |
| 144  | Growth Rate ~ Intercept + GMP + DT.h + PREC.k15d + T.k15d + T.night + NDVI15d                             | 6.794          | 0.001             | 0.940                        | 0.70       |
| 145  | Growth Rate ~ Intercept + DMI15d + GMP + DT.h + PREC + PREC.k15d + T.sd15d + GDD15d + NDVI15d             | 6.797          | 0.001             | 0.941                        | 0.70       |
| 146  | Growth Rate ~ Intercept + GMP + DT.h + PREC                                                               | 6.808          | 0.001             | 0.943                        | 0.70       |
| 147  | Growth Rate ~ Intercept + DMI15d + GMP + DT.h                                                             | 6.885          | 0.001             | 0.944                        | 0.70       |
| 148  | Growth Rate ~ Intercept + GMP + DT.h + PREC + T.k15d + T.sd15d + T.night + GDD15d + NDVI15d               | 6.920          | 0.001             | 0.945                        | 0.70       |

2011

| Rank | Model                                                                        | $\Delta AIC_c$ | wAIC <sub>c</sub> | Cumulative wAIC <sub>c</sub> | $R_{LR}^2$ |
|------|------------------------------------------------------------------------------|----------------|-------------------|------------------------------|------------|
| 149  | Growth Rate ~ Intercept + DMI15d + GMP + DT.h + PREC.k15d + T.k15d + T.night | 6.961          | 0.001             | 0.946                        | 0.70       |
| 150  | Growth Rate ~ Intercept + GMP + DT.h + T.k15d + T.night + NDVI15d            | 6.990          | 0.001             | 0.947                        | 0.70       |
| 151  | Growth Rate ~ Intercept + GMP + DT.h + PREC + T.night + NDVI15d              | 6.993          | 0.001             | 0.948                        | 0.70       |
| 152  | Growth Rate ~ Intercept + GMP + DT.h + PREC + PREC.k15d + T.k15d + T.night   | 7.012          | 0.001             | 0.949                        | 0.70       |

2012

| Rank | Model                                                                                         | $\Delta AIC_c$ | wAIC <sub>c</sub> | Cumulative wAIC <sub>c</sub> | $R_{LR}^2$ |
|------|-----------------------------------------------------------------------------------------------|----------------|-------------------|------------------------------|------------|
| 1    | Growth Rate ~ Intercept + DMI15d + GMP + DT.h + T.night + GDD15d                              | 0.000          | 0.063             | 0.060                        | 0.81       |
| 2    | Growth Rate ~ Intercept + DMI15d + GMP + DT.h + PREC.k15d + T.night + GDD15d                  | 0.296          | 0.054             | 0.111                        | 0.81       |
| 3    | Growth Rate ~ Intercept + DMI15d + GMP + DT.h + T.night                                       | 0.746          | 0.043             | 0.152                        | 0.81       |
| 4    | Growth Rate ~ Intercept + DMI15d + GMP + DT.h + PREC + T.night + GDD15d                       | 1.476          | 0.030             | 0.181                        | 0.81       |
| 5    | Growth Rate ~ Intercept + DMI15d + GMP + DT.h + PREC + PREC.k15d + T.night + GDD15d           | 1.499          | 0.030             | 0.209                        | 0.82       |
| 6    | Growth Rate ~ Intercept + GMP + DT.h + T.night                                                | 1.667          | 0.027             | 0.235                        | 0.81       |
| 7    | Growth Rate ~ Intercept + GMP + DT.h + PREC.k15d + T.night                                    | 1.897          | 0.024             | 0.258                        | 0.81       |
| 8    | Growth Rate ~ Intercept + DMI15d + GMP + DT.h + PREC.k15d + T.night                           | 1.905          | 0.024             | 0.281                        | 0.81       |
| 9    | Growth Rate ~ Intercept + DMI15d + GMP + DT.h + T.sd15d + T.night + GDD15d                    | 1.918          | 0.024             | 0.304                        | 0.81       |
| 10   | Growth Rate ~ Intercept + DMI15d + GMP + DT.h + T.night + GDD15d + NDVI15d                    | 2.084          | 0.022             | 0.325                        | 0.81       |
| 11   | Growth Rate ~ Intercept + DMI15d + GMP + DT.h + T.k15d + T.night + GDD15d                     | 2.163          | 0.021             | 0.345                        | 0.81       |
| 12   | Growth Rate ~ Intercept + GMP + DT.h + PREC.k15d + T.night + GDD15d                           | 2.190          | 0.021             | 0.365                        | 0.81       |
| 13   | Growth Rate ~ Intercept + DMI15d + GMP + DT.h + PREC.k15d + T.night + GDD15d + NDVI15d        | 2.331          | 0.020             | 0.384                        | 0.81       |
| 14   | Growth Rate ~ Intercept + DMI15d + GMP + DT.h + PREC.k15d + T.sd15d + T.night + GDD15d        | 2.367          | 0.019             | 0.402                        | 0.81       |
| 15   | Growth Rate ~ Intercept + DMI15d + GMP + DT.h + PREC + T.night                                | 2.370          | 0.019             | 0.420                        | 0.81       |
| 16   | Growth Rate ~ Intercept + DMI15d + GMP + DT.h + PREC.k15d + T.k15d + T.night + GDD15d         | 2.504          | 0.018             | 0.437                        | 0.81       |
| 17   | Growth Rate ~ Intercept + DMI15d + GMP + DT.h + T.sd15d + T.night                             | 2.867          | 0.015             | 0.452                        | 0.81       |
| 18   | Growth Rate ~ Intercept + DMI15d + GMP + DT.h + T.k15d + T.night                              | 2.882          | 0.015             | 0.466                        | 0.81       |
| 19   | Growth Rate ~ Intercept + GMP + DT.h + T.night + GDD15d                                       | 2.896          | 0.015             | 0.480                        | 0.81       |
| 20   | Growth Rate ~ Intercept + DMI15d + GMP + DT.h + T.night + NDVI15d                             | 2.910          | 0.015             | 0.494                        | 0.81       |
| 21   | Growth Rate ~ Intercept + DMI15d + GMP + DT.h + PREC + PREC.k15d + T.night                    | 3.373          | 0.012             | 0.505                        | 0.81       |
| 22   | Growth Rate ~ Intercept + DMI15d + GMP + DT.h + PREC + T.sd15d + T.night + GDD15d             | 3.451          | 0.011             | 0.515                        | 0.81       |
| 23   | Growth Rate ~ Intercept + DMI15d + GMP + DT.h + PREC + PREC.k15d + T.night + GDD15d + NDVI15d | 3.533          | 0.011             | 0.526                        | 0.82       |
| 24   | Growth Rate ~ Intercept + DMI15d + GMP + DT.h + PREC + T.k15d + T.night + GDD15d              | 3.556          | 0.011             | 0.536                        | 0.81       |
| 25   | Growth Rate ~ Intercept + DMI15d + GMP + DT.h + PREC + T.night + GDD15d + NDVI15d             | 3.569          | 0.011             | 0.546                        | 0.81       |
| 26   | Growth Rate ~ Intercept + DMI15d + GMP + DT.h + PREC + PREC.k15d + T.sd15d + T.night + GDD15d | 3.628          | 0.010             | 0.555                        | 0.82       |
| 27   | Growth Rate ~ Intercept + DMI15d + GMP + DT.h + PREC + PREC.k15d + T.k15d + T.night + GDD15d  | 3.674          | 0.010             | 0.565                        | 0.82       |
| 28   | Growth Rate ~ Intercept + GMP + DT.h + PREC + T.night                                         | 3.754          | 0.010             | 0.574                        | 0.81       |
| 29   | Growth Rate ~ Intercept + GMP + DT.h + T.k15d + T.night                                       | 3.764          | 0.010             | 0.583                        | 0.81       |
| 30   | Growth Rate ~ Intercept + GMP + DT.h + T.sd15d + T.night                                      | 3.790          | 0.009             | 0.592                        | 0.81       |
| 31   | Growth Rate ~ Intercept + GMP + DT.h + T.night + NDVI15d                                      | 3.829          | 0.009             | 0.601                        | 0.81       |
| 32   | Growth Rate ~ Intercept + DMI15d + GMP + DT.h                                                 | 3.933          | 0.009             | 0.609                        | 0.81       |
| 33   | Growth Rate ~ Intercept + DMI15d + GMP + DT.h + T.sd15d + T.night + GDD15d + NDVI15d          | 3.970          | 0.009             | 0.617                        | 0.81       |
| 34   | Growth Rate ~ Intercept + GMP + DT.h + PREC.k15d + T.k15d + T.night                           | 4.063          | 0.008             | 0.625                        | 0.81       |
| 35   | Growth Rate ~ Intercept + GMP + DT.h + PREC.k15d + T.night + NDVI15d                          | 4.075          | 0.008             | 0.633                        | 0.81       |
| 36   | Growth Rate ~ Intercept + GMP + DT.h + PREC.k15d + T.sd15d + T.night                          | 4.075          | 0.008             | 0.641                        | 0.81       |
| 37   | Growth Rate ~ Intercept + GMP + DT.h + PREC + PREC.k15d + T.night                             | 4.076          | 0.008             | 0.649                        | 0.81       |
| 38   | Growth Rate ~ Intercept + DMI15d + GMP + DT.h + PREC.k15d + T.night + NDVI15d                 | 4.088          | 0.008             | 0.656                        | 0.81       |

2012

| Rank | Model                                                                                                   | $\Delta AIC_c$ | wAIC <sub>c</sub> | Cumulative wAIC <sub>c</sub> | $R_{LR}^2$ |
|------|---------------------------------------------------------------------------------------------------------|----------------|-------------------|------------------------------|------------|
| 39   | Growth Rate ~ Intercept + DMI15d + GMP + DT.h + PREC.k15d + T.k15d + T.night                            | 4.088          | 0.008             | 0.664                        | 0.81       |
| 40   | Growth Rate ~ Intercept + DMI15d + GMP + DT.h + PREC.k15d + T.sd15d + T.night                           | 4.088          | 0.008             | 0.672                        | 0.81       |
| 41   | Growth Rate ~ Intercept + DMI15d + GMP + DT.h + T.k15d + T.sd15d + T.night + GDD15d                     | 4.090          | 0.008             | 0.680                        | 0.81       |
| 42   | Growth Rate ~ Intercept + DMI15d + GMP + DT.h + T.k15d + T.night + GDD15d + NDVI15d                     | 4.266          | 0.007             | 0.687                        | 0.81       |
| 43   | Growth Rate ~ Intercept + GMP + DT.h + PREC.k15d + T.night + GDD15d + NDVI15d                           | 4.278          | 0.007             | 0.694                        | 0.81       |
| 44   | Growth Rate ~ Intercept + GMP + DT.h + PREC.k15d + T.sd15d + T.night + GDD15d                           | 4.353          | 0.007             | 0.700                        | 0.81       |
| 45   | Growth Rate ~ Intercept + GMP + DT.h + PREC + PREC.k15d + T.night + GDD15d                              | 4.365          | 0.007             | 0.707                        | 0.81       |
| 46   | Growth Rate ~ Intercept + DMI15d + GMP + DT.h + PREC.k15d + T.sd15d + T.night + GDD15d + NDVI15d        | 4.379          | 0.007             | 0.714                        | 0.81       |
| 47   | Growth Rate ~ Intercept + GMP + DT.h + PREC.k15d + T.k15d + T.night + GDD15d                            | 4.381          | 0.007             | 0.720                        | 0.81       |
| 48   | Growth Rate ~ Intercept + DMI15d + GMP + DT.h + PREC + T.k15d + T.night                                 | 4.422          | 0.007             | 0.727                        | 0.81       |
| 49   | Growth Rate ~ Intercept + DMI15d + GMP + DT.h + PREC + T.sd15d + T.night                                | 4.526          | 0.007             | 0.733                        | 0.81       |
| 50   | Growth Rate ~ Intercept + DMI15d + GMP + DT.h + PREC + T.night + NDVI15d                                | 4.549          | 0.006             | 0.739                        | 0.81       |
| 51   | Growth Rate ~ Intercept + DMI15d + GMP + DT.h + PREC.k15d + T.k15d + T.night + GDD15d + NDVI15d         | 4.555          | 0.006             | 0.745                        | 0.81       |
| 52   | Growth Rate ~ Intercept + DMI15d + GMP + DT.h + PREC.k15d + T.k15d + T.sd15d + T.night + GDD15d         | 4.590          | 0.006             | 0.751                        | 0.81       |
| 53   | Growth Rate ~ Intercept + GMP + DT.h + PREC + T.night + GDD15d                                          | 4.888          | 0.005             | 0.757                        | 0.81       |
| 54   | Growth Rate ~ Intercept + GMP + DT.h + T.sd15d + T.night + GDD15d                                       | 4.956          | 0.005             | 0.762                        | 0.81       |
| 55   | Growth Rate ~ Intercept + DMI15d + GMP + DT.h + T.k15d + T.sd15d + T.night                              | 5.014          | 0.005             | 0.767                        | 0.81       |
| 56   | Growth Rate ~ Intercept + GMP + DT.h + T.k15d + T.night + GDD15d                                        | 5.016          | 0.005             | 0.771                        | 0.81       |
| 57   | Growth Rate ~ Intercept + GMP + DT.h + T.night + GDD15d + NDVI15d                                       | 5.036          | 0.005             | 0.776                        | 0.81       |
| 58   | Growth Rate ~ Intercept + DMI15d + GMP + DT.h + T.sd15d + T.night + NDVI15d                             | 5.050          | 0.005             | 0.781                        | 0.81       |
| 59   | Growth Rate ~ Intercept + DMI15d + GMP + DT.h + T.k15d + T.night + NDVI15d                              | 5.060          | 0.005             | 0.786                        | 0.81       |
| 60   | Growth Rate ~ Intercept + DMI15d + GMP + DT.h + PREC.k15d                                               | 5.378          | 0.004             | 0.790                        | 0.81       |
| 61   | Growth Rate ~ Intercept + DMI15d + GMP + DT.h + PREC + PREC.k15d + T.k15d + T.night                     | 5.498          | 0.004             | 0.794                        | 0.81       |
| 62   | Growth Rate ~ Intercept + DMI15d + GMP + DT.h + PREC + T.sd15d + T.night + GDD15d + NDVI15d             | 5.514          | 0.004             | 0.797                        | 0.81       |
| 63   | Growth Rate ~ Intercept + DMI15d + GMP + DT.h + PREC + T.k15d + T.sd15d + T.night + GDD15d              | 5.537          | 0.004             | 0.801                        | 0.81       |
| 64   | Growth Rate ~ Intercept + DMI15d + GMP + DT.h + GDD15d                                                  | 5.549          | 0.004             | 0.805                        | 0.81       |
| 65   | Growth Rate ~ Intercept + DMI15d + GMP + DT.h + PREC + PREC.k15d + T.night + NDVI15d                    | 5.571          | 0.004             | 0.809                        | 0.81       |
| 66   | Growth Rate ~ Intercept + DMI15d + GMP + DT.h + PREC + PREC.k15d + T.sd15d + T.night                    | 5.580          | 0.004             | 0.812                        | 0.81       |
| 67   | Growth Rate ~ Intercept + DMI15d + GMP + DT.h + PREC + PREC.k15d + T.sd15d + T.night + GDD15d + NDVI15d | 5.643          | 0.004             | 0.816                        | 0.82       |
| 68   | Growth Rate ~ Intercept + DMI15d + GMP + DT.h + PREC + T.k15d + T.night + GDD15d + NDVI15d              | 5.671          | 0.004             | 0.819                        | 0.81       |
| 69   | Growth Rate ~ Intercept + DMI15d + GMP + DT.h + PREC + PREC.k15d + T.k15d + T.night + GDD15d + NDVI15d  | 5.729          | 0.004             | 0.823                        | 0.82       |
| 70   | Growth Rate ~ Intercept + DMI15d + GMP + DT.h + T.k15d                                                  | 5.749          | 0.004             | 0.826                        | 0.81       |
| 71   | Growth Rate ~ Intercept + DMI15d + GMP + DT.h + PREC                                                    | 5.787          | 0.003             | 0.829                        | 0.81       |
| 72   | Growth Rate ~ Intercept + DMI15d + GMP + DT.h + PREC + PREC.k15d + T.k15d + T.sd15d + T.night + GDD15d  | 5.812          | 0.003             | 0.833                        | 0.82       |
| 73   | Growth Rate ~ Intercept + GMP + DT.h + PREC + T.sd15d + T.night                                         | 5.884          | 0.003             | 0.836                        | 0.81       |
| 74   | Growth Rate ~ Intercept + GMP + DT.h + PREC + T.k15d + T.night                                          | 5.889          | 0.003             | 0.839                        | 0.81       |
| 75   | Growth Rate ~ Intercept + GMP + DT.h + T.k15d + T.sd15d + T.night                                       | 5.898          | 0.003             | 0.842                        | 0.81       |
| 76   | Growth Rate ~ Intercept + GMP + DT.h + PREC + T.night + NDVI15d                                         | 5.930          | 0.003             | 0.845                        | 0.81       |

2012

| Rank | Model                                                                                                     | $\Delta AIC_c$ | wAIC <sub>c</sub> | Cumulative wAIC <sub>c</sub> | $R_{LR}^2$ |
|------|-----------------------------------------------------------------------------------------------------------|----------------|-------------------|------------------------------|------------|
| 77   | Growth Rate ~ Intercept + GMP + DT.h + T.k15d + T.night + NDVI15d                                         | 5.940          | 0.003             | 0.848                        | 0.81       |
| 78   | Growth Rate ~ Intercept + GMP + DT.h + T.sd15d + T.night + NDVI15d                                        | 5.968          | 0.003             | 0.851                        | 0.81       |
| 79   | Growth Rate ~ Intercept + DMI15d + GMP + DT.h + T.sd15d                                                   | 6.087          | 0.003             | 0.854                        | 0.81       |
| 80   | Growth Rate ~ Intercept + DMI15d + GMP + DT.h + NDVI15d                                                   | 6.097          | 0.003             | 0.857                        | 0.81       |
| 81   | Growth Rate ~ Intercept + DMI15d + GMP + DT.h + T.k15d + T.sd15d + T.night + GDD15d + NDVI15d             | 6.161          | 0.003             | 0.860                        | 0.81       |
| 82   | Growth Rate ~ Intercept + GMP + DT.h                                                                      | 6.177          | 0.003             | 0.862                        | 0.81       |
| 83   | Growth Rate ~ Intercept + GMP + DT.h + PREC.k15d + T.k15d + T.night + NDVI15d                             | 6.255          | 0.003             | 0.865                        | 0.81       |
| 84   | Growth Rate ~ Intercept + GMP + DT.h + PREC + PREC.k15d + T.k15d + T.night                                | 6.256          | 0.003             | 0.868                        | 0.81       |
| 85   | Growth Rate ~ Intercept + GMP + DT.h + PREC.k15d + T.k15d + T.sd15d + T.night                             | 6.256          | 0.003             | 0.870                        | 0.81       |
| 86   | Growth Rate ~ Intercept + GMP + DT.h + PREC.k15d + T.sd15d + T.night + NDVI15d                            | 6.268          | 0.003             | 0.873                        | 0.81       |
| 87   | Growth Rate ~ Intercept + GMP + DT.h + PREC + PREC.k15d + T.night + NDVI15d                               | 6.268          | 0.003             | 0.875                        | 0.81       |
| 88   | Growth Rate ~ Intercept + GMP + DT.h + PREC + PREC.k15d + T.sd15d + T.night                               | 6.269          | 0.003             | 0.878                        | 0.81       |
| 89   | Growth Rate ~ Intercept + DMI15d + GMP + DT.h + PREC.k15d + T.k15d + T.sd15d + T.night                    | 6.285          | 0.003             | 0.881                        | 0.81       |
| 90   | Growth Rate ~ Intercept + DMI15d + GMP + DT.h + PREC.k15d + T.k15d + T.night + NDVI15d                    | 6.286          | 0.003             | 0.883                        | 0.81       |
| 91   | Growth Rate ~ Intercept + DMI15d + GMP + DT.h + PREC.k15d + T.sd15d + T.night + NDVI15d                   | 6.288          | 0.003             | 0.886                        | 0.81       |
| 92   | Growth Rate ~ Intercept + GMP + DT.h + PREC.k15d + T.sd15d + T.night + GDD15d + NDVI15d                   | 6.442          | 0.003             | 0.888                        | 0.81       |
| 93   | Growth Rate ~ Intercept + GMP + DT.h + PREC + PREC.k15d + T.night + GDD15d + NDVI15d                      | 6.468          | 0.002             | 0.890                        | 0.81       |
| 94   | Growth Rate ~ Intercept + GMP + DT.h + PREC.k15d + T.k15d + T.night + GDD15d + NDVI15d                    | 6.485          | 0.002             | 0.893                        | 0.81       |
| 95   | Growth Rate ~ Intercept + GMP + DT.h + PREC + PREC.k15d + T.sd15d + T.night + GDD15d                      | 6.538          | 0.002             | 0.895                        | 0.81       |
| 96   | Growth Rate ~ Intercept + GMP + DT.h + PREC.k15d + T.k15d + T.sd15d + T.night + GDD15d                    | 6.559          | 0.002             | 0.897                        | 0.81       |
| 97   | Growth Rate ~ Intercept + GMP + DT.h + PREC + PREC.k15d + T.k15d + T.night + GDD15d                       | 6.574          | 0.002             | 0.899                        | 0.81       |
| 98   | Growth Rate ~ Intercept + DMI15d + GMP + DT.h + PREC + T.k15d + T.sd15d + T.night                         | 6.589          | 0.002             | 0.902                        | 0.81       |
| 99   | Growth Rate ~ Intercept + GMP + DT.h + PREC.k15d                                                          | 6.591          | 0.002             | 0.904                        | 0.81       |
| 100  | Growth Rate ~ Intercept + DMI15d + GMP + DT.h + PREC + T.k15d + T.night + NDVI15d                         | 6.614          | 0.002             | 0.906                        | 0.81       |
| 101  | Growth Rate ~ Intercept + DMI15d + GMP + DT.h + PREC.k15d + T.k15d + T.sd15d + T.night + GDD15d + NDVI15d | 6.618          | 0.002             | 0.908                        | 0.81       |
| 102  | Growth Rate ~ Intercept + DMI15d + GMP + DT.h + PREC + T.sd15d + T.night + NDVI15d                        | 6.723          | 0.002             | 0.910                        | 0.81       |
| 103  | Growth Rate ~ Intercept + DMI15d + GMP + DT.h + PREC.k15d + GDD15d                                        | 6.765          | 0.002             | 0.912                        | 0.81       |
| 104  | Growth Rate ~ Intercept + GMP + DT.h + PREC + T.sd15d + T.night + GDD15d                                  | 6.937          | 0.002             | 0.914                        | 0.81       |
| 105  | Growth Rate ~ Intercept + GMP + DT.h + PREC + T.night + GDD15d + NDVI15d                                  | 7.039          | 0.002             | 0.916                        | 0.81       |
| 106  | Growth Rate ~ Intercept + GMP + DT.h + PREC + T.k15d + T.night + GDD15d                                   | 7.055          | 0.002             | 0.918                        | 0.81       |
| 107  | Growth Rate ~ Intercept + DMI15d + GMP + DT.h + PREC.k15d + T.k15d                                        | 7.066          | 0.002             | 0.920                        | 0.81       |
| 108  | Growth Rate ~ Intercept + GMP + DT.h + T.k15d + T.sd15d + T.night + GDD15d                                | 7.084          | 0.002             | 0.921                        | 0.81       |
| 109  | Growth Rate ~ Intercept + GMP + DT.h + T.sd15d + T.night + GDD15d + NDVI15d                               | 7.092          | 0.002             | 0.923                        | 0.81       |
| 110  | Growth Rate ~ Intercept + DMI15d + GMP + DT.h + PREC + PREC.k15d                                          | 7.160          | 0.002             | 0.925                        | 0.81       |
| 111  | Growth Rate ~ Intercept + GMP + DT.h + T.k15d + T.night + GDD15d + NDVI15d                                | 7.172          | 0.002             | 0.926                        | 0.81       |
| 112  | Growth Rate ~ Intercept + DMI15d + GMP + DT.h + T.k15d + T.sd15d + T.night + NDVI15d                      | 7.211          | 0.002             | 0.928                        | 0.81       |
| 113  | Growth Rate ~ Intercept + DMI15d + GMP + DT.h + T.k15d + GDD15d                                           | 7.227          | 0.002             | 0.929                        | 0.81       |
| 114  | Growth Rate ~ Intercept + DMI15d + GMP + DT.h + PREC + GDD15d                                             | 7.394          | 0.002             | 0.931                        | 0.81       |

2012

| Rank | Model                                                                                                            | $\Delta AIC_c$ | wAIC <sub>c</sub> | Cumulative wAIC <sub>c</sub> | $R_{LR}^2$ |
|------|------------------------------------------------------------------------------------------------------------------|----------------|-------------------|------------------------------|------------|
| 115  | Growth Rate ~ Intercept + DMI15d + GMP + DT.h + PREC.k15d + T.sd15d                                              | 7.557          | 0.001             | 0.932                        | 0.81       |
| 116  | Growth Rate ~ Intercept + DMI15d + GMP + DT.h + PREC.k15d + NDVI15d                                              | 7.557          | 0.001             | 0.934                        | 0.81       |
| 117  | Growth Rate ~ Intercept + DMI15d + GMP + DT.h + PREC + T.k15d + T.sd15d + T.night + GDD15d + NDVI15d             | 7.623          | 0.001             | 0.935                        | 0.81       |
| 118  | Growth Rate ~ Intercept + DMI15d + GMP + DT.h + T.sd15d + GDD15d                                                 | 7.690          | 0.001             | 0.936                        | 0.81       |
| 119  | Growth Rate ~ Intercept + DMI15d + GMP + DT.h + GDD15d + NDVI15d                                                 | 7.704          | 0.001             | 0.938                        | 0.81       |
| 120  | Growth Rate ~ Intercept + DMI15d + GMP + DT.h + PREC + PREC.k15d + T.k15d + T.night + NDVI15d                    | 7.711          | 0.001             | 0.939                        | 0.81       |
| 121  | Growth Rate ~ Intercept + DMI15d + GMP + DT.h + PREC + T.k15d                                                    | 7.718          | 0.001             | 0.940                        | 0.81       |
| 122  | Growth Rate ~ Intercept + DMI15d + GMP + DT.h + PREC + PREC.k15d + T.k15d + T.sd15d + T.night                    | 7.720          | 0.001             | 0.941                        | 0.81       |
| 123  | Growth Rate ~ Intercept + DMI15d + GMP + DT.h + PREC + PREC.k15d + T.sd15d + T.night + NDVI15d                   | 7.795          | 0.001             | 0.943                        | 0.81       |
| 124  | Growth Rate ~ Intercept + DMI15d + GMP + DT.h + PREC + PREC.k15d + T.k15d + T.sd15d + T.night + GDD15d + NDVI15d | 7.849          | 0.001             | 0.944                        | 0.82       |
| 125  | Growth Rate ~ Intercept + DMI15d + GMP + DT.h + T.k15d + T.sd15d                                                 | 7.919          | 0.001             | 0.945                        | 0.81       |
| 126  | Growth Rate ~ Intercept + GMP + DT.h + T.k15d                                                                    | 7.926          | 0.001             | 0.946                        | 0.81       |
| 127  | Growth Rate ~ Intercept + DMI15d + GMP + DT.h + T.k15d + NDVI15d                                                 | 7.927          | 0.001             | 0.947                        | 0.81       |
| 128  | Growth Rate ~ Intercept + GMP + DT.h + PREC                                                                      | 7.932          | 0.001             | 0.948                        | 0.81       |
| 129  | Growth Rate ~ Intercept + DMI15d + GMP + DT.h + PREC + T.sd15d                                                   | 7.962          | 0.001             | 0.949                        | 0.81       |

2013

| Rank | Model                                                                                                   | $\Delta AIC_c$ | wAIC <sub>c</sub> | Cumulative wAIC <sub>c</sub> | $R_{LR}^2$ |
|------|---------------------------------------------------------------------------------------------------------|----------------|-------------------|------------------------------|------------|
| 1    | Growth Rate ~ Intercept + DMI15d + GMP + DT.h + PREC.k15d + T.k15d + T.sd15d + NDVI15d                  | 0.000          | 0.050             | 0.048                        | 0.71       |
| 2    | Growth Rate ~ Intercept + DMI15d + GMP + DT.h + T.k15d + T.sd15d + NDVI15d                              | 0.083          | 0.048             | 0.093                        | 0.70       |
| 3    | Growth Rate ~ Intercept + DMI15d + GMP + DT.h + T.k15d + NDVI15d                                        | 0.142          | 0.047             | 0.137                        | 0.70       |
| 4    | Growth Rate ~ Intercept + DMI15d + GMP + DT.h + PREC.k15d + T.k15d + NDVI15d                            | 0.249          | 0.044             | 0.179                        | 0.70       |
| 5    | Growth Rate ~ Intercept + DMI15d + GMP + DT.h + PREC.k15d + NDVI15d                                     | 0.316          | 0.043             | 0.220                        | 0.70       |
| 6    | Growth Rate ~ Intercept + DMI15d + GMP + DT.h + NDVI15d                                                 | 0.351          | 0.042             | 0.260                        | 0.70       |
| 7    | Growth Rate ~ Intercept + DMI15d + GMP + DT.h + PREC + PREC.k15d + T.k15d + NDVI15d                     | 0.997          | 0.030             | 0.289                        | 0.70       |
| 8    | Growth Rate ~ Intercept + DMI15d + GMP + DT.h + PREC + PREC.k15d + NDVI15d                              | 1.033          | 0.030             | 0.317                        | 0.70       |
| 9    | Growth Rate ~ Intercept + DMI15d + GMP + DT.h + PREC + PREC.k15d + T.k15d + T.sd15d + NDVI15d           | 1.134          | 0.028             | 0.344                        | 0.71       |
| 10   | Growth Rate ~ Intercept + DMI15d + GMP + DT.h + PREC.k15d + T.sd15d + NDVI15d                           | 1.143          | 0.028             | 0.371                        | 0.70       |
| 11   | Growth Rate ~ Intercept + DMI15d + GMP + DT.h + PREC + T.k15d + NDVI15d                                 | 1.295          | 0.026             | 0.396                        | 0.70       |
| 12   | Growth Rate ~ Intercept + DMI15d + GMP + DT.h + T.sd15d + NDVI15d                                       | 1.338          | 0.026             | 0.420                        | 0.70       |
| 13   | Growth Rate ~ Intercept + DMI15d + GMP + DT.h + PREC + NDVI15d                                          | 1.484          | 0.024             | 0.443                        | 0.70       |
| 14   | Growth Rate ~ Intercept + DMI15d + GMP + DT.h + PREC + T.k15d + T.sd15d + NDVI15d                       | 1.547          | 0.023             | 0.465                        | 0.70       |
| 15   | Growth Rate ~ Intercept + DMI15d + GMP + DT.h + PREC.k15d + T.k15d + T.sd15d + GDD15d + NDVI15d         | 1.853          | 0.020             | 0.483                        | 0.71       |
| 16   | Growth Rate ~ Intercept + DMI15d + GMP + DT.h + PREC.k15d + T.k15d + T.sd15d + T.night + NDVI15d        | 1.986          | 0.019             | 0.501                        | 0.71       |
| 17   | Growth Rate ~ Intercept + DMI15d + GMP + DT.h + T.k15d + T.night + NDVI15d                              | 2.106          | 0.017             | 0.518                        | 0.70       |
| 18   | Growth Rate ~ Intercept + DMI15d + GMP + DT.h + T.k15d + GDD15d + NDVI15d                               | 2.126          | 0.017             | 0.534                        | 0.70       |
| 19   | Growth Rate ~ Intercept + DMI15d + GMP + DT.h + PREC + PREC.k15d + T.sd15d + NDVI15d                    | 2.141          | 0.017             | 0.550                        | 0.70       |
| 20   | Growth Rate ~ Intercept + DMI15d + GMP + DT.h + T.k15d + T.sd15d + T.night + NDVI15d                    | 2.167          | 0.017             | 0.566                        | 0.70       |
| 21   | Growth Rate ~ Intercept + DMI15d + GMP + DT.h + T.k15d + T.sd15d + GDD15d + NDVI15d                     | 2.167          | 0.017             | 0.583                        | 0.70       |
| 22   | Growth Rate ~ Intercept + DMI15d + GMP + DT.h + PREC.k15d + GDD15d + NDVI15d                            | 2.289          | 0.016             | 0.598                        | 0.70       |
| 23   | Growth Rate ~ Intercept + DMI15d + GMP + DT.h + PREC.k15d + T.k15d + GDD15d + NDVI15d                   | 2.315          | 0.016             | 0.613                        | 0.70       |
| 24   | Growth Rate ~ Intercept + DMI15d + GMP + DT.h + PREC.k15d + T.k15d + T.night + NDVI15d                  | 2.332          | 0.016             | 0.627                        | 0.70       |
| 25   | Growth Rate ~ Intercept + DMI15d + GMP + DT.h + T.night + NDVI15d                                       | 2.351          | 0.015             | 0.642                        | 0.70       |
| 26   | Growth Rate ~ Intercept + DMI15d + GMP + DT.h + PREC.k15d + T.night + NDVI15d                           | 2.393          | 0.015             | 0.656                        | 0.70       |
| 27   | Growth Rate ~ Intercept + DMI15d + GMP + DT.h + GDD15d + NDVI15d                                        | 2.406          | 0.015             | 0.671                        | 0.70       |
| 28   | Growth Rate ~ Intercept + DMI15d + GMP + DT.h + PREC + T.sd15d + NDVI15d                                | 2.694          | 0.013             | 0.683                        | 0.70       |
| 29   | Growth Rate ~ Intercept + DMI15d + GMP + DT.h + PREC.k15d + T.sd15d + GDD15d + NDVI15d                  | 2.848          | 0.012             | 0.695                        | 0.70       |
| 30   | Growth Rate ~ Intercept + DMI15d + GMP + DT.h + PREC + PREC.k15d + GDD15d + NDVI15d                     | 3.022          | 0.011             | 0.705                        | 0.70       |
| 31   | Growth Rate ~ Intercept + DMI15d + GMP + DT.h + PREC + PREC.k15d + T.k15d + T.sd15d + GDD15d + NDVI15d  | 3.029          | 0.011             | 0.715                        | 0.71       |
| 32   | Growth Rate ~ Intercept + DMI15d + GMP + DT.h + PREC + PREC.k15d + T.k15d + T.night + NDVI15d           | 3.072          | 0.011             | 0.726                        | 0.70       |
| 33   | Growth Rate ~ Intercept + DMI15d + GMP + DT.h + PREC + PREC.k15d + T.k15d + GDD15d + NDVI15d            | 3.073          | 0.011             | 0.736                        | 0.70       |
| 34   | Growth Rate ~ Intercept + DMI15d + GMP + DT.h + PREC + PREC.k15d + T.night + NDVI15d                    | 3.115          | 0.011             | 0.746                        | 0.70       |
| 35   | Growth Rate ~ Intercept + DMI15d + GMP + DT.h + PREC.k15d + T.sd15d + T.night + NDVI15d                 | 3.129          | 0.010             | 0.756                        | 0.70       |
| 36   | Growth Rate ~ Intercept + DMI15d + GMP + DT.h + PREC + PREC.k15d + T.k15d + T.sd15d + T.night + NDVI15d | 3.183          | 0.010             | 0.766                        | 0.71       |
| 37   | Growth Rate ~ Intercept + DMI15d + GMP + DT.h + PREC + T.k15d + T.night + NDVI15d                       | 3.186          | 0.010             | 0.775                        | 0.70       |
| 38   | Growth Rate ~ Intercept + DMI15d + GMP + DT.h + PREC + T.k15d + GDD15d + NDVI15d                        | 3.247          | 0.010             | 0.785                        | 0.70       |



2013

| Rank | Model                                                                                                            | $\Delta AIC_c$ | wAIC <sub>c</sub> | Cumulative wAIC <sub>c</sub> | $R_{LR}^2$ |
|------|------------------------------------------------------------------------------------------------------------------|----------------|-------------------|------------------------------|------------|
| 39   | Growth Rate ~ Intercept + DMI15d + GMP + DT.h + T.sd15d + GDD15d + NDVI15d                                       | 3.408          | 0.009             | 0.793                        | 0.70       |
| 40   | Growth Rate ~ Intercept + DMI15d + GMP + DT.h + T.sd15d + T.night + NDVI15d                                      | 3.415          | 0.009             | 0.802                        | 0.70       |
| 41   | Growth Rate ~ Intercept + DMI15d + GMP + DT.h + PREC + T.night + NDVI15d                                         | 3.425          | 0.009             | 0.810                        | 0.70       |
| 42   | Growth Rate ~ Intercept + DMI15d + GMP + DT.h + PREC + GDD15d + NDVI15d                                          | 3.526          | 0.009             | 0.819                        | 0.70       |
| 43   | Growth Rate ~ Intercept + DMI15d + GMP + DT.h + PREC + T.k15d + T.sd15d + T.night + NDVI15d                      | 3.620          | 0.008             | 0.826                        | 0.70       |
| 44   | Growth Rate ~ Intercept + DMI15d + GMP + DT.h + PREC + T.k15d + T.sd15d + GDD15d + NDVI15d                       | 3.630          | 0.008             | 0.834                        | 0.70       |
| 45   | Growth Rate ~ Intercept + DMI15d + GMP + DT.h + PREC.k15d + T.k15d + T.sd15d + T.night + GDD15d + NDVI15d        | 3.753          | 0.008             | 0.841                        | 0.71       |
| 46   | Growth Rate ~ Intercept + DMI15d + GMP + DT.h + PREC + PREC.k15d + T.sd15d + GDD15d + NDVI15d                    | 3.903          | 0.007             | 0.848                        | 0.70       |
| 47   | Growth Rate ~ Intercept + DMI15d + GMP + DT.h + T.k15d + T.night + GDD15d + NDVI15d                              | 4.077          | 0.007             | 0.854                        | 0.70       |
| 48   | Growth Rate ~ Intercept + DMI15d + GMP + DT.h + PREC + PREC.k15d + T.sd15d + T.night + NDVI15d                   | 4.191          | 0.006             | 0.860                        | 0.70       |
| 49   | Growth Rate ~ Intercept + DMI15d + GMP + DT.h + T.k15d + T.sd15d + T.night + GDD15d + NDVI15d                    | 4.256          | 0.006             | 0.866                        | 0.70       |
| 50   | Growth Rate ~ Intercept + DMI15d + GMP + DT.h + PREC.k15d + T.night + GDD15d + NDVI15d                           | 4.365          | 0.006             | 0.871                        | 0.70       |
| 51   | Growth Rate ~ Intercept + DMI15d + GMP + DT.h + PREC.k15d + T.k15d + T.night + GDD15d + NDVI15d                  | 4.405          | 0.006             | 0.876                        | 0.70       |
| 52   | Growth Rate ~ Intercept + DMI15d + GMP + DT.h + T.night + GDD15d + NDVI15d                                       | 4.405          | 0.006             | 0.882                        | 0.70       |
| 53   | Growth Rate ~ Intercept + DMI15d + GMP + DT.h + PREC.k15d + T.sd15d + T.night + GDD15d + NDVI15d                 | 4.721          | 0.005             | 0.886                        | 0.70       |
| 54   | Growth Rate ~ Intercept + DMI15d + GMP + DT.h + PREC + T.sd15d + T.night + NDVI15d                               | 4.754          | 0.005             | 0.891                        | 0.70       |
| 55   | Growth Rate ~ Intercept + DMI15d + GMP + DT.h + PREC + T.sd15d + GDD15d + NDVI15d                                | 4.778          | 0.005             | 0.895                        | 0.70       |
| 56   | Growth Rate ~ Intercept + DMI15d + GMP + DT.h + PREC + PREC.k15d + T.k15d + T.sd15d + T.night + GDD15d + NDVI15d | 5.023          | 0.004             | 0.899                        | 0.71       |
| 57   | Growth Rate ~ Intercept + DMI15d + GMP + DT.h + PREC + PREC.k15d + T.night + GDD15d + NDVI15d                    | 5.113          | 0.004             | 0.902                        | 0.70       |
| 58   | Growth Rate ~ Intercept + DMI15d + GMP + DT.h + PREC + T.k15d + T.night + GDD15d + NDVI15d                       | 5.114          | 0.004             | 0.906                        | 0.70       |
| 59   | Growth Rate ~ Intercept + DMI15d + GMP + DT.h + PREC + PREC.k15d + T.k15d + T.night + GDD15d + NDVI15d           | 5.158          | 0.004             | 0.910                        | 0.70       |
| 60   | Growth Rate ~ Intercept + DMI15d + GMP + DT.h + PREC + T.night + GDD15d + NDVI15d                                | 5.461          | 0.003             | 0.913                        | 0.70       |
| 61   | Growth Rate ~ Intercept + DMI15d + GMP + DT.h + T.k15d + T.sd15d                                                 | 5.487          | 0.003             | 0.916                        | 0.70       |
| 62   | Growth Rate ~ Intercept + DMI15d + GMP + DT.h + T.sd15d + T.night + GDD15d + NDVI15d                             | 5.492          | 0.003             | 0.919                        | 0.70       |
| 63   | Growth Rate ~ Intercept + DMI15d + GMP + DT.h + PREC.k15d + T.k15d + T.sd15d                                     | 5.516          | 0.003             | 0.922                        | 0.70       |
| 64   | Growth Rate ~ Intercept + DMI15d + GMP + DT.h + PREC + T.k15d + T.sd15d + T.night + GDD15d + NDVI15d             | 5.705          | 0.003             | 0.925                        | 0.70       |
| 65   | Growth Rate ~ Intercept + DMI15d + GMP + DT.h + PREC + PREC.k15d + T.sd15d + T.night + GDD15d + NDVI15d          | 5.881          | 0.003             | 0.927                        | 0.70       |
| 66   | Growth Rate ~ Intercept + GMP + DT.h + PREC.k15d + T.sd15d + GDD15d + NDVI15d                                    | 6.133          | 0.002             | 0.929                        | 0.70       |
| 67   | Growth Rate ~ Intercept + GMP + DT.h + PREC.k15d + T.k15d + T.sd15d + GDD15d + NDVI15d                           | 6.357          | 0.002             | 0.931                        | 0.70       |
| 68   | Growth Rate ~ Intercept + DMI15d + GMP + DT.h + PREC + PREC.k15d + T.k15d + T.sd15d                              | 6.462          | 0.002             | 0.933                        | 0.70       |
| 69   | Growth Rate ~ Intercept + DMI15d + GMP + DT.h + PREC.k15d + T.k15d + T.sd15d + GDD15d                            | 6.622          | 0.002             | 0.935                        | 0.70       |
| 70   | Growth Rate ~ Intercept + DMI15d + GMP + DT.h + PREC.k15d + T.sd15d                                              | 6.622          | 0.002             | 0.937                        | 0.70       |
| 71   | Growth Rate ~ Intercept + DMI15d + GMP + DT.h + T.sd15d                                                          | 6.683          | 0.002             | 0.938                        | 0.70       |
| 72   | Growth Rate ~ Intercept + DMI15d + GMP + DT.h + PREC + T.k15d + T.sd15d                                          | 6.792          | 0.002             | 0.940                        | 0.70       |
| 73   | Growth Rate ~ Intercept + DMI15d + GMP + DT.h + PREC + T.sd15d + T.night + GDD15d + NDVI15d                      | 6.844          | 0.002             | 0.942                        | 0.70       |
| 74   | Growth Rate ~ Intercept + GMP + DT.h + T.sd15d + GDD15d + NDVI15d                                                | 7.140          | 0.001             | 0.943                        | 0.70       |
| 75   | Growth Rate ~ Intercept + GMP + DT.h + T.k15d + T.sd15d + GDD15d + NDVI15d                                       | 7.194          | 0.001             | 0.944                        | 0.70       |
| 76   | Growth Rate ~ Intercept + DMI15d + GMP + DT.h + T.k15d + T.sd15d + GDD15d                                        | 7.346          | 0.001             | 0.945                        | 0.70       |

2013

| Rank | Model                                                                                | $\Delta AIC_c$ | wAIC <sub>c</sub> | Cumulative wAIC <sub>c</sub> | $R_{LR}^2$ |
|------|--------------------------------------------------------------------------------------|----------------|-------------------|------------------------------|------------|
| 77   | Growth Rate ~ Intercept + GMP + DT.h + PREC + PREC.k15d + T.sd15d + GDD15d + NDVI15d | 7.373          | 0.001             | 0.947                        | 0.70       |
| 78   | Growth Rate ~ Intercept + DMI15d + GMP + DT.h                                        | 7.407          | 0.001             | 0.948                        | 0.70       |
| 79   | Growth Rate ~ Intercept + DMI15d + GMP + DT.h + PREC + PREC.k15d + T.sd15d           | 7.423          | 0.001             | 0.949                        | 0.70       |

2014

| Rank | Model                                                                                                     | $\Delta AIC_c$ | wAIC <sub>c</sub> | Cumulative wAIC <sub>c</sub> | $R_{LR}^2$ |
|------|-----------------------------------------------------------------------------------------------------------|----------------|-------------------|------------------------------|------------|
| 1    | Growth Rate ~ Intercept + GMP + DT.h + T.sd15d + GDD15d + NDVI15d                                         | 0.000          | 0.076             | 0.072                        | 0.81       |
| 2    | Growth Rate ~ Intercept + GMP + DT.h + T.k15d + T.sd15d + GDD15d + NDVI15d                                | 0.005          | 0.076             | 0.144                        | 0.81       |
| 3    | Growth Rate ~ Intercept + GMP + DT.h + T.sd15d + T.night + GDD15d + NDVI15d                               | 0.818          | 0.050             | 0.191                        | 0.81       |
| 4    | Growth Rate ~ Intercept + DMI15d + GMP + DT.h + T.sd15d + GDD15d + NDVI15d                                | 0.909          | 0.048             | 0.237                        | 0.81       |
| 5    | Growth Rate ~ Intercept + DMI15d + GMP + DT.h + T.k15d + T.sd15d + GDD15d + NDVI15d                       | 0.919          | 0.048             | 0.282                        | 0.81       |
| 6    | Growth Rate ~ Intercept + GMP + DT.h + T.k15d + T.sd15d + T.night + GDD15d + NDVI15d                      | 1.084          | 0.044             | 0.324                        | 0.81       |
| 7    | Growth Rate ~ Intercept + DMI15d + GMP + DT.h + T.sd15d + T.night + GDD15d + NDVI15d                      | 1.585          | 0.034             | 0.357                        | 0.81       |
| 8    | Growth Rate ~ Intercept + GMP + DT.h + PREC.k15d + T.sd15d + GDD15d + NDVI15d                             | 1.698          | 0.032             | 0.388                        | 0.81       |
| 9    | Growth Rate ~ Intercept + GMP + DT.h + PREC.k15d + T.k15d + T.sd15d + GDD15d + NDVI15d                    | 1.740          | 0.032             | 0.418                        | 0.81       |
| 10   | Growth Rate ~ Intercept + DMI15d + GMP + DT.h + T.k15d + T.sd15d + T.night + GDD15d + NDVI15d             | 1.868          | 0.030             | 0.446                        | 0.81       |
| 11   | Growth Rate ~ Intercept + DMI15d + GMP + DT.h + PREC.k15d + T.sd15d + GDD15d + NDVI15d                    | 2.090          | 0.027             | 0.471                        | 0.81       |
| 12   | Growth Rate ~ Intercept + DMI15d + GMP + DT.h + PREC.k15d + T.k15d + T.sd15d + GDD15d + NDVI15d           | 2.144          | 0.026             | 0.496                        | 0.81       |
| 13   | Growth Rate ~ Intercept + GMP + DT.h + PREC + T.k15d + T.sd15d + GDD15d + NDVI15d                         | 2.145          | 0.026             | 0.520                        | 0.81       |
| 14   | Growth Rate ~ Intercept + GMP + DT.h + PREC + T.sd15d + GDD15d + NDVI15d                                  | 2.149          | 0.026             | 0.545                        | 0.81       |
| 15   | Growth Rate ~ Intercept + GMP + DT.h + PREC.k15d + T.sd15d + T.night + GDD15d + NDVI15d                   | 2.717          | 0.019             | 0.563                        | 0.81       |
| 16   | Growth Rate ~ Intercept + GMP + DT.h + PREC + T.sd15d + T.night + GDD15d + NDVI15d                        | 2.944          | 0.017             | 0.580                        | 0.81       |
| 17   | Growth Rate ~ Intercept + DMI15d + GMP + DT.h + PREC + T.sd15d + GDD15d + NDVI15d                         | 2.964          | 0.017             | 0.596                        | 0.81       |
| 18   | Growth Rate ~ Intercept + GMP + DT.h + PREC.k15d + T.k15d + T.sd15d + T.night + GDD15d + NDVI15d          | 2.999          | 0.017             | 0.612                        | 0.81       |
| 19   | Growth Rate ~ Intercept + DMI15d + GMP + DT.h + PREC + T.k15d + T.sd15d + GDD15d + NDVI15d                | 3.052          | 0.016             | 0.628                        | 0.81       |
| 20   | Growth Rate ~ Intercept + DMI15d + GMP + DT.h + PREC.k15d + T.sd15d + T.night + GDD15d + NDVI15d          | 3.062          | 0.016             | 0.644                        | 0.81       |
| 21   | Growth Rate ~ Intercept + GMP + DT.h + PREC + T.k15d + T.sd15d + T.night + GDD15d + NDVI15d               | 3.174          | 0.015             | 0.658                        | 0.81       |
| 22   | Growth Rate ~ Intercept + DMI15d + GMP + DT.h + PREC.k15d + T.k15d + T.sd15d + T.night + GDD15d + NDVI15d | 3.361          | 0.014             | 0.672                        | 0.81       |
| 23   | Growth Rate ~ Intercept + GMP + DT.h + GDD15d + NDVI15d                                                   | 3.451          | 0.013             | 0.684                        | 0.81       |
| 24   | Growth Rate ~ Intercept + DMI15d + GMP + DT.h + PREC + T.sd15d + T.night + GDD15d + NDVI15d               | 3.730          | 0.012             | 0.696                        | 0.81       |
| 25   | Growth Rate ~ Intercept + GMP + DT.h + PREC + PREC.k15d + T.sd15d + GDD15d + NDVI15d                      | 3.838          | 0.011             | 0.706                        | 0.81       |
| 26   | Growth Rate ~ Intercept + GMP + DT.h + PREC + PREC.k15d + T.k15d + T.sd15d + GDD15d + NDVI15d             | 3.842          | 0.011             | 0.717                        | 0.81       |
| 27   | Growth Rate ~ Intercept + DMI15d + GMP + DT.h + PREC + T.k15d + T.sd15d + T.night + GDD15d + NDVI15d      | 4.048          | 0.010             | 0.726                        | 0.81       |
| 28   | Growth Rate ~ Intercept + DMI15d + GMP + DT.h + PREC + PREC.k15d + T.sd15d + GDD15d + NDVI15d             | 4.218          | 0.009             | 0.735                        | 0.81       |
| 29   | Growth Rate ~ Intercept + DMI15d + GMP + DT.h + PREC + PREC.k15d + T.k15d + T.sd15d + GDD15d + NDVI15d    | 4.320          | 0.009             | 0.743                        | 0.81       |
| 30   | Growth Rate ~ Intercept + GMP + DT.h + T.night + GDD15d + NDVI15d                                         | 4.645          | 0.007             | 0.750                        | 0.81       |
| 31   | Growth Rate ~ Intercept + GMP + DT.h + PREC.k15d + GDD15d + NDVI15d                                       | 4.659          | 0.007             | 0.757                        | 0.81       |
| 32   | Growth Rate ~ Intercept + DMI15d + GMP + DT.h + T.k15d + T.sd15d + GDD15d                                 | 4.699          | 0.007             | 0.764                        | 0.81       |
| 33   | Growth Rate ~ Intercept + GMP + DT.h + T.k15d + GDD15d + NDVI15d                                          | 4.750          | 0.007             | 0.771                        | 0.81       |
| 34   | Growth Rate ~ Intercept + GMP + DT.h + PREC + PREC.k15d + T.sd15d + T.night + GDD15d + NDVI15d            | 4.814          | 0.007             | 0.777                        | 0.81       |
| 35   | Growth Rate ~ Intercept + GMP + DT.h + T.k15d + T.sd15d + GDD15d                                          | 5.036          | 0.006             | 0.783                        | 0.81       |
| 36   | Growth Rate ~ Intercept + GMP + DT.h + PREC + PREC.k15d + T.k15d + T.sd15d + T.night + GDD15d + NDVI15d   | 5.043          | 0.006             | 0.789                        | 0.81       |
| 37   | Growth Rate ~ Intercept + GMP + DT.h + T.sd15d + NDVI15d                                                  | 5.206          | 0.006             | 0.794                        | 0.81       |
| 38   | Growth Rate ~ Intercept + DMI15d + GMP + DT.h + PREC + PREC.k15d + T.sd15d + T.night + GDD15d + NDVI15d   | 5.240          | 0.006             | 0.799                        | 0.81       |

2014

| Rank | Model                                                                                                            | $\Delta AIC_c$ | wAIC <sub>c</sub> | Cumulative wAIC <sub>c</sub> | $R_{LR}^2$ |
|------|------------------------------------------------------------------------------------------------------------------|----------------|-------------------|------------------------------|------------|
| 39   | Growth Rate ~ Intercept + GMP + DT.h + PREC + GDD15d + NDVI15d                                                   | 5.302          | 0.005             | 0.804                        | 0.81       |
| 40   | Growth Rate ~ Intercept + DMI15d + GMP + DT.h + T.sd15d + GDD15d                                                 | 5.329          | 0.005             | 0.809                        | 0.81       |
| 41   | Growth Rate ~ Intercept + GMP + DT.h + T.k15d + T.sd15d + NDVI15d                                                | 5.545          | 0.005             | 0.814                        | 0.81       |
| 42   | Growth Rate ~ Intercept + DMI15d + GMP + DT.h + GDD15d + NDVI15d                                                 | 5.551          | 0.005             | 0.818                        | 0.81       |
| 43   | Growth Rate ~ Intercept + DMI15d + GMP + DT.h + PREC + PREC.k15d + T.k15d + T.sd15d + T.night + GDD15d + NDVI15d | 5.556          | 0.005             | 0.823                        | 0.81       |
| 44   | Growth Rate ~ Intercept + GMP + DT.h + T.sd15d + GDD15d                                                          | 5.741          | 0.004             | 0.827                        | 0.81       |
| 45   | Growth Rate ~ Intercept + GMP + DT.h + GDD15d                                                                    | 5.871          | 0.004             | 0.831                        | 0.80       |
| 46   | Growth Rate ~ Intercept + DMI15d + GMP + DT.h + T.sd15d + NDVI15d                                                | 5.875          | 0.004             | 0.835                        | 0.81       |
| 47   | Growth Rate ~ Intercept + GMP + DT.h + PREC.k15d + T.k15d + GDD15d + NDVI15d                                     | 5.949          | 0.004             | 0.838                        | 0.81       |
| 48   | Growth Rate ~ Intercept + GMP + DT.h + PREC.k15d + T.night + GDD15d + NDVI15d                                    | 6.082          | 0.004             | 0.842                        | 0.81       |
| 49   | Growth Rate ~ Intercept + GMP + DT.h + T.k15d + T.night + GDD15d + NDVI15d                                       | 6.110          | 0.004             | 0.845                        | 0.81       |
| 50   | Growth Rate ~ Intercept + DMI15d + GMP + DT.h + T.k15d + T.sd15d + T.night + GDD15d                              | 6.129          | 0.004             | 0.848                        | 0.81       |
| 51   | Growth Rate ~ Intercept + GMP + DT.h + NDVI15d                                                                   | 6.140          | 0.004             | 0.852                        | 0.80       |
| 52   | Growth Rate ~ Intercept + DMI15d + GMP + DT.h + T.k15d + T.sd15d + NDVI15d                                       | 6.201          | 0.003             | 0.855                        | 0.81       |
| 53   | Growth Rate ~ Intercept + GMP + DT.h + T.k15d + GDD15d                                                           | 6.444          | 0.003             | 0.858                        | 0.81       |
| 54   | Growth Rate ~ Intercept + DMI15d + GMP + DT.h + PREC.k15d + T.k15d + T.sd15d + GDD15d                            | 6.501          | 0.003             | 0.861                        | 0.81       |
| 55   | Growth Rate ~ Intercept + DMI15d + GMP + DT.h + T.sd15d + T.night + GDD15d                                       | 6.530          | 0.003             | 0.863                        | 0.81       |
| 56   | Growth Rate ~ Intercept + DMI15d + GMP + DT.h + PREC.k15d + GDD15d + NDVI15d                                     | 6.571          | 0.003             | 0.866                        | 0.81       |
| 57   | Growth Rate ~ Intercept + DMI15d + GMP + DT.h + PREC + T.k15d + T.sd15d + GDD15d                                 | 6.596          | 0.003             | 0.869                        | 0.81       |
| 58   | Growth Rate ~ Intercept + GMP + DT.h + T.k15d + T.sd15d + T.night + GDD15d                                       | 6.606          | 0.003             | 0.871                        | 0.81       |
| 59   | Growth Rate ~ Intercept + GMP + DT.h + PREC + T.night + GDD15d + NDVI15d                                         | 6.614          | 0.003             | 0.874                        | 0.81       |
| 60   | Growth Rate ~ Intercept + GMP + DT.h + PREC + T.k15d + GDD15d + NDVI15d                                          | 6.640          | 0.003             | 0.877                        | 0.81       |
| 61   | Growth Rate ~ Intercept + GMP + DT.h + PREC + PREC.k15d + GDD15d + NDVI15d                                       | 6.687          | 0.003             | 0.879                        | 0.81       |
| 62   | Growth Rate ~ Intercept + DMI15d + GMP + DT.h + T.night + GDD15d + NDVI15d                                       | 6.749          | 0.003             | 0.882                        | 0.81       |
| 63   | Growth Rate ~ Intercept + GMP + DT.h + PREC + T.sd15d + NDVI15d                                                  | 6.870          | 0.002             | 0.884                        | 0.81       |
| 64   | Growth Rate ~ Intercept + DMI15d + GMP + DT.h + T.k15d + GDD15d + NDVI15d                                        | 6.882          | 0.002             | 0.886                        | 0.81       |
| 65   | Growth Rate ~ Intercept + DMI15d + GMP + DT.h + PREC + T.sd15d + NDVI15d                                         | 6.896          | 0.002             | 0.889                        | 0.81       |
| 66   | Growth Rate ~ Intercept + DMI15d + GMP + DT.h + PREC + T.sd15d + GDD15d                                          | 7.030          | 0.002             | 0.891                        | 0.81       |
| 67   | Growth Rate ~ Intercept + GMP + DT.h + T.sd15d + T.night + GDD15d                                                | 7.096          | 0.002             | 0.893                        | 0.81       |
| 68   | Growth Rate ~ Intercept + DMI15d + GMP + DT.h + PREC.k15d + T.sd15d + GDD15d                                     | 7.129          | 0.002             | 0.895                        | 0.81       |
| 69   | Growth Rate ~ Intercept + GMP + DT.h + PREC.k15d + T.k15d + T.sd15d + GDD15d                                     | 7.170          | 0.002             | 0.897                        | 0.81       |
| 70   | Growth Rate ~ Intercept + GMP + DT.h + PREC + T.k15d + T.sd15d + GDD15d                                          | 7.183          | 0.002             | 0.899                        | 0.81       |
| 71   | Growth Rate ~ Intercept + GMP + DT.h + T.sd15d + T.night + NDVI15d                                               | 7.233          | 0.002             | 0.901                        | 0.81       |
| 72   | Growth Rate ~ Intercept + DMI15d + GMP + DT.h + PREC + GDD15d + NDVI15d                                          | 7.282          | 0.002             | 0.903                        | 0.81       |
| 73   | Growth Rate ~ Intercept + GMP + DT.h + PREC.k15d + T.sd15d + NDVI15d                                             | 7.289          | 0.002             | 0.904                        | 0.81       |
| 74   | Growth Rate ~ Intercept + GMP + DT.h + PREC + NDVI15d                                                            | 7.296          | 0.002             | 0.906                        | 0.80       |
| 75   | Growth Rate ~ Intercept + DMI15d + GMP + DT.h + GDD15d                                                           | 7.317          | 0.002             | 0.908                        | 0.80       |
| 76   | Growth Rate ~ Intercept + GMP + DT.h + T.night + GDD15d                                                          | 7.338          | 0.002             | 0.910                        | 0.80       |

2014

| Rank | Model                                                                                           | $\Delta AIC_c$ | wAIC <sub>c</sub> | Cumulative wAIC <sub>c</sub> | $R_{LR}^2$ |
|------|-------------------------------------------------------------------------------------------------|----------------|-------------------|------------------------------|------------|
| 77   | Growth Rate ~ Intercept + GMP + DT.h + PREC + T.k15d + T.sd15d + NDVI15d                        | 7.346          | 0.002             | 0.912                        | 0.81       |
| 78   | Growth Rate ~ Intercept + GMP + DT.h + T.k15d + NDVI15d                                         | 7.402          | 0.002             | 0.914                        | 0.80       |
| 79   | Growth Rate ~ Intercept + DMI15d + GMP + DT.h + PREC + T.k15d + T.sd15d + NDVI15d               | 7.431          | 0.002             | 0.915                        | 0.81       |
| 80   | Growth Rate ~ Intercept + GMP + DT.h + PREC.k15d + T.k15d + T.night + GDD15d + NDVI15d          | 7.525          | 0.002             | 0.917                        | 0.81       |
| 81   | Growth Rate ~ Intercept + GMP + DT.h + T.k15d + T.sd15d + T.night + NDVI15d                     | 7.645          | 0.002             | 0.919                        | 0.81       |
| 82   | Growth Rate ~ Intercept + GMP + DT.h + PREC.k15d + T.k15d + T.sd15d + NDVI15d                   | 7.653          | 0.002             | 0.920                        | 0.81       |
| 83   | Growth Rate ~ Intercept + DMI15d + GMP + DT.h + PREC.k15d + T.sd15d + NDVI15d                   | 7.711          | 0.002             | 0.922                        | 0.81       |
| 84   | Growth Rate ~ Intercept + GMP + DT.h + PREC + GDD15d                                            | 7.720          | 0.002             | 0.923                        | 0.80       |
| 85   | Growth Rate ~ Intercept + GMP + DT.h + PREC.k15d + GDD15d                                       | 7.828          | 0.002             | 0.925                        | 0.80       |
| 86   | Growth Rate ~ Intercept + GMP + DT.h + PREC + T.sd15d + GDD15d                                  | 7.836          | 0.002             | 0.926                        | 0.81       |
| 87   | Growth Rate ~ Intercept + DMI15d + GMP + DT.h + T.sd15d + T.night + NDVI15d                     | 7.857          | 0.001             | 0.928                        | 0.81       |
| 88   | Growth Rate ~ Intercept + GMP + DT.h + PREC.k15d + T.sd15d + GDD15d                             | 7.865          | 0.001             | 0.929                        | 0.81       |
| 89   | Growth Rate ~ Intercept + DMI15d + GMP + DT.h + PREC.k15d + T.k15d + GDD15d + NDVI15d           | 7.929          | 0.001             | 0.930                        | 0.81       |
| 90   | Growth Rate ~ Intercept + GMP + DT.h + PREC.k15d + NDVI15d                                      | 7.991          | 0.001             | 0.932                        | 0.80       |
| 91   | Growth Rate ~ Intercept + GMP + DT.h + PREC + PREC.k15d + T.k15d + GDD15d + NDVI15d             | 8.007          | 0.001             | 0.933                        | 0.81       |
| 92   | Growth Rate ~ Intercept + DMI15d + GMP + DT.h + PREC.k15d + T.night + GDD15d + NDVI15d          | 8.022          | 0.001             | 0.934                        | 0.81       |
| 93   | Growth Rate ~ Intercept + DMI15d + GMP + DT.h + NDVI15d                                         | 8.046          | 0.001             | 0.936                        | 0.80       |
| 94   | Growth Rate ~ Intercept + DMI15d + GMP + DT.h + PREC.k15d + T.k15d + T.sd15d + T.night + GDD15d | 8.074          | 0.001             | 0.937                        | 0.81       |
| 95   | Growth Rate ~ Intercept + DMI15d + GMP + DT.h + PREC.k15d + T.k15d + T.sd15d + NDVI15d          | 8.077          | 0.001             | 0.938                        | 0.81       |
| 96   | Growth Rate ~ Intercept + GMP + DT.h + T.k15d + T.night + GDD15d                                | 8.077          | 0.001             | 0.939                        | 0.81       |
| 97   | Growth Rate ~ Intercept + GMP + DT.h + PREC + T.k15d + T.night + GDD15d + NDVI15d               | 8.101          | 0.001             | 0.941                        | 0.81       |
| 98   | Growth Rate ~ Intercept + DMI15d + GMP + DT.h + T.k15d + GDD15d                                 | 8.109          | 0.001             | 0.942                        | 0.81       |
| 99   | Growth Rate ~ Intercept + DMI15d + GMP + DT.h + PREC + T.k15d + T.sd15d + T.night + GDD15d      | 8.119          | 0.001             | 0.943                        | 0.81       |
| 100  | Growth Rate ~ Intercept + GMP + DT.h + T.night + NDVI15d                                        | 8.156          | 0.001             | 0.944                        | 0.80       |
| 101  | Growth Rate ~ Intercept + GMP + DT.h + PREC + PREC.k15d + T.night + GDD15d + NDVI15d            | 8.171          | 0.001             | 0.945                        | 0.81       |
| 102  | Growth Rate ~ Intercept + DMI15d + GMP + DT.h + T.k15d + T.night + GDD15d + NDVI15d             | 8.247          | 0.001             | 0.947                        | 0.81       |
| 103  | Growth Rate ~ Intercept + DMI15d + GMP + DT.h + T.k15d + T.sd15d + T.night + NDVI15d            | 8.271          | 0.001             | 0.948                        | 0.81       |
| 104  | Growth Rate ~ Intercept + GMP + DT.h + PREC + T.k15d + GDD15d                                   | 8.340          | 0.001             | 0.949                        | 0.81       |

2015

| Rank | Model                                                                                            | $\Delta AIC_c$ | wAIC <sub>c</sub> | Cumulative wAIC <sub>c</sub> | $R_{LR}^2$ |
|------|--------------------------------------------------------------------------------------------------|----------------|-------------------|------------------------------|------------|
| 1    | Growth Rate ~ Intercept + GMP + DT.h + PREC.k15d + T.k15d + NDVI15d                              | 0.000          | 0.064             | 0.061                        | 0.77       |
| 2    | Growth Rate ~ Intercept + DMI15d + GMP + DT.h + PREC.k15d + T.sd15d + NDVI15d                    | 0.522          | 0.049             | 0.107                        | 0.77       |
| 3    | Growth Rate ~ Intercept + GMP + DT.h + PREC.k15d + T.sd15d + NDVI15d                             | 0.637          | 0.046             | 0.151                        | 0.77       |
| 4    | Growth Rate ~ Intercept + DMI15d + GMP + DT.h + PREC.k15d + T.k15d + NDVI15d                     | 1.028          | 0.038             | 0.187                        | 0.77       |
| 5    | Growth Rate ~ Intercept + GMP + DT.h + PREC.k15d + NDVI15d                                       | 1.229          | 0.034             | 0.220                        | 0.76       |
| 6    | Growth Rate ~ Intercept + DMI15d + GMP + DT.h + PREC.k15d + T.night + NDVI15d                    | 1.244          | 0.034             | 0.253                        | 0.77       |
| 7    | Growth Rate ~ Intercept + GMP + DT.h + PREC.k15d + T.k15d + T.sd15d + NDVI15d                    | 1.292          | 0.033             | 0.284                        | 0.77       |
| 8    | Growth Rate ~ Intercept + GMP + DT.h + PREC.k15d + T.k15d + T.night + NDVI15d                    | 1.366          | 0.032             | 0.315                        | 0.77       |
| 9    | Growth Rate ~ Intercept + DMI15d + GMP + DT.h + PREC.k15d + NDVI15d                              | 1.426          | 0.031             | 0.345                        | 0.76       |
| 10   | Growth Rate ~ Intercept + GMP + DT.h + PREC.k15d + T.night + NDVI15d                             | 1.671          | 0.028             | 0.371                        | 0.76       |
| 11   | Growth Rate ~ Intercept + DMI15d + GMP + DT.h + PREC.k15d + T.sd15d + T.night + NDVI15d          | 1.697          | 0.027             | 0.397                        | 0.77       |
| 12   | Growth Rate ~ Intercept + DMI15d + GMP + DT.h + PREC.k15d + T.k15d + T.sd15d + NDVI15d           | 1.906          | 0.025             | 0.420                        | 0.77       |
| 13   | Growth Rate ~ Intercept + DMI15d + GMP + DT.h + PREC.k15d + T.k15d + T.night + NDVI15d           | 1.921          | 0.024             | 0.443                        | 0.77       |
| 14   | Growth Rate ~ Intercept + GMP + DT.h + PREC + PREC.k15d + T.k15d + NDVI15d                       | 2.061          | 0.023             | 0.465                        | 0.77       |
| 15   | Growth Rate ~ Intercept + GMP + DT.h + PREC.k15d + T.k15d + GDD15d + NDVI15d                     | 2.095          | 0.022             | 0.486                        | 0.77       |
| 16   | Growth Rate ~ Intercept + GMP + DT.h + PREC.k15d + T.sd15d + T.night + NDVI15d                   | 2.166          | 0.022             | 0.506                        | 0.77       |
| 17   | Growth Rate ~ Intercept + GMP + DT.h + PREC + PREC.k15d + T.sd15d + NDVI15d                      | 2.405          | 0.019             | 0.525                        | 0.77       |
| 18   | Growth Rate ~ Intercept + GMP + DT.h + PREC.k15d + T.sd15d + GDD15d + NDVI15d                    | 2.511          | 0.018             | 0.542                        | 0.77       |
| 19   | Growth Rate ~ Intercept + DMI15d + GMP + DT.h + PREC + PREC.k15d + T.sd15d + NDVI15d             | 2.561          | 0.018             | 0.559                        | 0.77       |
| 20   | Growth Rate ~ Intercept + DMI15d + GMP + DT.h + PREC.k15d + T.sd15d + GDD15d + NDVI15d           | 2.624          | 0.017             | 0.575                        | 0.77       |
| 21   | Growth Rate ~ Intercept + GMP + DT.h + PREC.k15d + GDD15d + NDVI15d                              | 2.786          | 0.016             | 0.590                        | 0.76       |
| 22   | Growth Rate ~ Intercept + DMI15d + GMP + DT.h + PREC + PREC.k15d + T.night + NDVI15d             | 2.911          | 0.015             | 0.604                        | 0.77       |
| 23   | Growth Rate ~ Intercept + DMI15d + GMP + DT.h + PREC + PREC.k15d + T.k15d + NDVI15d              | 2.920          | 0.015             | 0.618                        | 0.77       |
| 24   | Growth Rate ~ Intercept + DMI15d + GMP + DT.h + PREC + PREC.k15d + NDVI15d                       | 2.958          | 0.015             | 0.632                        | 0.76       |
| 25   | Growth Rate ~ Intercept + GMP + DT.h + PREC.k15d + T.k15d + T.sd15d + T.night + NDVI15d          | 3.001          | 0.014             | 0.646                        | 0.77       |
| 26   | Growth Rate ~ Intercept + DMI15d + GMP + DT.h + PREC.k15d + T.k15d + GDD15d + NDVI15d            | 3.059          | 0.014             | 0.659                        | 0.77       |
| 27   | Growth Rate ~ Intercept + GMP + DT.h + PREC + PREC.k15d + T.k15d + T.sd15d + NDVI15d             | 3.172          | 0.013             | 0.671                        | 0.77       |
| 28   | Growth Rate ~ Intercept + GMP + DT.h + PREC.k15d + T.night + GDD15d + NDVI15d                    | 3.233          | 0.013             | 0.683                        | 0.76       |
| 29   | Growth Rate ~ Intercept + DMI15d + GMP + DT.h + PREC.k15d + T.night + GDD15d + NDVI15d           | 3.279          | 0.012             | 0.695                        | 0.77       |
| 30   | Growth Rate ~ Intercept + DMI15d + GMP + DT.h + PREC.k15d + T.k15d + T.sd15d + T.night + NDVI15d | 3.299          | 0.012             | 0.706                        | 0.77       |
| 31   | Growth Rate ~ Intercept + GMP + DT.h + PREC + PREC.k15d + NDVI15d                                | 3.310          | 0.012             | 0.718                        | 0.76       |
| 32   | Growth Rate ~ Intercept + GMP + DT.h + PREC + PREC.k15d + T.k15d + T.night + NDVI15d             | 3.383          | 0.012             | 0.729                        | 0.77       |
| 33   | Growth Rate ~ Intercept + GMP + DT.h + PREC.k15d + T.k15d + T.sd15d + GDD15d + NDVI15d           | 3.394          | 0.012             | 0.740                        | 0.77       |
| 34   | Growth Rate ~ Intercept + DMI15d + GMP + DT.h + PREC.k15d + GDD15d + NDVI15d                     | 3.410          | 0.012             | 0.751                        | 0.76       |
| 35   | Growth Rate ~ Intercept + GMP + DT.h + PREC.k15d + T.k15d + T.night + GDD15d + NDVI15d           | 3.459          | 0.011             | 0.762                        | 0.77       |
| 36   | Growth Rate ~ Intercept + GMP + DT.h + PREC + PREC.k15d + T.night + NDVI15d                      | 3.702          | 0.010             | 0.771                        | 0.76       |
| 37   | Growth Rate ~ Intercept + DMI15d + GMP + DT.h + PREC + PREC.k15d + T.sd15d + T.night + NDVI15d   | 3.718          | 0.010             | 0.781                        | 0.77       |

2015

| Rank | Model                                                                                                     | $\Delta AIC_c$ | wAIC <sub>c</sub> | Cumulative wAIC <sub>c</sub> | $R_{LR}^2$ |
|------|-----------------------------------------------------------------------------------------------------------|----------------|-------------------|------------------------------|------------|
| 38   | Growth Rate ~ Intercept + DMI15d + GMP + DT.h + PREC.k15d + T.sd15d + T.night + GDD15d + NDVI15d          | 3.805          | 0.010             | 0.790                        | 0.77       |
| 39   | Growth Rate ~ Intercept + DMI15d + GMP + DT.h + PREC + PREC.k15d + T.k15d + T.night + NDVI15d             | 3.827          | 0.009             | 0.799                        | 0.77       |
| 40   | Growth Rate ~ Intercept + GMP + DT.h + PREC + PREC.k15d + T.sd15d + T.night + NDVI15d                     | 3.912          | 0.009             | 0.807                        | 0.77       |
| 41   | Growth Rate ~ Intercept + DMI15d + GMP + DT.h + PREC.k15d + T.k15d + T.sd15d + GDD15d + NDVI15d           | 3.937          | 0.009             | 0.816                        | 0.77       |
| 42   | Growth Rate ~ Intercept + DMI15d + GMP + DT.h + PREC + PREC.k15d + T.k15d + T.sd15d + NDVI15d             | 3.975          | 0.009             | 0.824                        | 0.77       |
| 43   | Growth Rate ~ Intercept + DMI15d + GMP + DT.h + PREC.k15d + T.k15d + T.night + GDD15d + NDVI15d           | 3.992          | 0.009             | 0.832                        | 0.77       |
| 44   | Growth Rate ~ Intercept + GMP + DT.h + PREC.k15d + T.sd15d + T.night + GDD15d + NDVI15d                   | 4.000          | 0.009             | 0.841                        | 0.77       |
| 45   | Growth Rate ~ Intercept + GMP + DT.h + PREC + PREC.k15d + T.k15d + GDD15d + NDVI15d                       | 4.163          | 0.008             | 0.848                        | 0.77       |
| 46   | Growth Rate ~ Intercept + GMP + DT.h + PREC + PREC.k15d + T.sd15d + GDD15d + NDVI15d                      | 4.288          | 0.007             | 0.855                        | 0.77       |
| 47   | Growth Rate ~ Intercept + DMI15d + GMP + DT.h + PREC + PREC.k15d + T.sd15d + GDD15d + NDVI15d             | 4.668          | 0.006             | 0.861                        | 0.77       |
| 48   | Growth Rate ~ Intercept + GMP + DT.h + PREC.k15d + T.k15d                                                 | 4.685          | 0.006             | 0.867                        | 0.76       |
| 49   | Growth Rate ~ Intercept + GMP + DT.h + PREC + PREC.k15d + T.k15d + T.sd15d + T.night + NDVI15d            | 4.863          | 0.006             | 0.872                        | 0.77       |
| 50   | Growth Rate ~ Intercept + GMP + DT.h + PREC + PREC.k15d + GDD15d + NDVI15d                                | 4.869          | 0.006             | 0.878                        | 0.76       |
| 51   | Growth Rate ~ Intercept + DMI15d + GMP + DT.h + PREC + PREC.k15d + T.k15d + GDD15d + NDVI15d              | 4.901          | 0.005             | 0.883                        | 0.77       |
| 52   | Growth Rate ~ Intercept + DMI15d + GMP + DT.h + PREC + PREC.k15d + T.night + GDD15d + NDVI15d             | 5.009          | 0.005             | 0.888                        | 0.77       |
| 53   | Growth Rate ~ Intercept + DMI15d + GMP + DT.h + PREC + PREC.k15d + GDD15d + NDVI15d                       | 5.035          | 0.005             | 0.893                        | 0.76       |
| 54   | Growth Rate ~ Intercept + GMP + DT.h + PREC.k15d + T.k15d + T.sd15d + T.night + GDD15d + NDVI15d          | 5.101          | 0.005             | 0.897                        | 0.77       |
| 55   | Growth Rate ~ Intercept + GMP + DT.h + PREC + PREC.k15d + T.night + GDD15d + NDVI15d                      | 5.257          | 0.005             | 0.902                        | 0.76       |
| 56   | Growth Rate ~ Intercept + GMP + DT.h + PREC + PREC.k15d + T.k15d + T.sd15d + GDD15d + NDVI15d             | 5.280          | 0.005             | 0.906                        | 0.77       |
| 57   | Growth Rate ~ Intercept + DMI15d + GMP + DT.h + PREC + PREC.k15d + T.k15d + T.sd15d + T.night + NDVI15d   | 5.353          | 0.004             | 0.910                        | 0.77       |
| 58   | Growth Rate ~ Intercept + DMI15d + GMP + DT.h + PREC.k15d + T.k15d + T.sd15d + T.night + GDD15d + NDVI15d | 5.366          | 0.004             | 0.914                        | 0.77       |
| 59   | Growth Rate ~ Intercept + GMP + DT.h + PREC + PREC.k15d + T.k15d + T.night + GDD15d + NDVI15d             | 5.481          | 0.004             | 0.918                        | 0.77       |
| 60   | Growth Rate ~ Intercept + GMP + DT.h + PREC.k15d + T.k15d + T.night                                       | 5.582          | 0.004             | 0.922                        | 0.76       |
| 61   | Growth Rate ~ Intercept + GMP + DT.h + PREC + PREC.k15d + T.sd15d + T.night + GDD15d + NDVI15d            | 5.755          | 0.004             | 0.925                        | 0.77       |
| 62   | Growth Rate ~ Intercept + DMI15d + GMP + DT.h + PREC + PREC.k15d + T.sd15d + T.night + GDD15d + NDVI15d   | 5.833          | 0.003             | 0.929                        | 0.77       |
| 63   | Growth Rate ~ Intercept + DMI15d + GMP + DT.h + PREC + PREC.k15d + T.k15d + T.night + GDD15d + NDVI15d    | 5.861          | 0.003             | 0.932                        | 0.77       |
| 64   | Growth Rate ~ Intercept + DMI15d + GMP + DT.h + PREC + PREC.k15d + T.k15d + T.sd15d + GDD15d + NDVI15d    | 5.986          | 0.003             | 0.935                        | 0.77       |
| 65   | Growth Rate ~ Intercept + GMP + DT.h + PREC.k15d + T.k15d + T.sd15d                                       | 6.260          | 0.003             | 0.937                        | 0.76       |
| 66   | Growth Rate ~ Intercept + GMP + DT.h + PREC.k15d + T.night                                                | 6.367          | 0.003             | 0.940                        | 0.76       |
| 67   | Growth Rate ~ Intercept + GMP + DT.h + PREC.k15d + T.sd15d                                                | 6.378          | 0.003             | 0.942                        | 0.76       |
| 68   | Growth Rate ~ Intercept + DMI15d + GMP + DT.h + PREC.k15d + T.k15d                                        | 6.443          | 0.003             | 0.945                        | 0.76       |
| 69   | Growth Rate ~ Intercept + GMP + DT.h + PREC.k15d + T.k15d + GDD15d                                        | 6.721          | 0.002             | 0.947                        | 0.76       |
| 70   | Growth Rate ~ Intercept + GMP + DT.h + PREC.k15d                                                          | 6.755          | 0.002             | 0.949                        | 0.76       |

2016

| Rank | Model                                                                                          | $\Delta AIC_c$ | wAIC <sub>c</sub> | Cumulative wAIC <sub>c</sub> | $R_{LR}^2$ |
|------|------------------------------------------------------------------------------------------------|----------------|-------------------|------------------------------|------------|
| 1    | Growth Rate ~ Intercept + GMP + DT.h + PREC + T.sd15d + NDVI15d                                | 0.000          | 0.048             | 0.045                        | 0.80       |
| 2    | Growth Rate ~ Intercept + GMP + DT.h + PREC + PREC.k15d + T.sd15d + NDVI15d                    | 0.227          | 0.042             | 0.085                        | 0.80       |
| 3    | Growth Rate ~ Intercept + GMP + DT.h + PREC + PREC.k15d + T.sd15d + GDD15d + NDVI15d           | 0.297          | 0.041             | 0.124                        | 0.80       |
| 4    | Growth Rate ~ Intercept + GMP + DT.h + T.sd15d + NDVI15d                                       | 0.594          | 0.035             | 0.158                        | 0.80       |
| 5    | Growth Rate ~ Intercept + GMP + DT.h + PREC + T.sd15d + GDD15d + NDVI15d                       | 0.612          | 0.035             | 0.191                        | 0.80       |
| 6    | Growth Rate ~ Intercept + DMI15d + GMP + DT.h + PREC + PREC.k15d + T.sd15d + NDVI15d           | 0.949          | 0.030             | 0.219                        | 0.80       |
| 7    | Growth Rate ~ Intercept + GMP + DT.h + T.sd15d + GDD15d + NDVI15d                              | 0.967          | 0.029             | 0.247                        | 0.80       |
| 8    | Growth Rate ~ Intercept + GMP + DT.h + PREC + PREC.k15d + T.k15d + T.sd15d + NDVI15d           | 0.973          | 0.029             | 0.275                        | 0.80       |
| 9    | Growth Rate ~ Intercept + GMP + DT.h + PREC + T.k15d + T.sd15d + NDVI15d                       | 1.318          | 0.025             | 0.298                        | 0.80       |
| 10   | Growth Rate ~ Intercept + DMI15d + GMP + DT.h + PREC + T.sd15d + NDVI15d                       | 1.568          | 0.022             | 0.319                        | 0.80       |
| 11   | Growth Rate ~ Intercept + GMP + DT.h + T.k15d + T.sd15d + NDVI15d                              | 1.602          | 0.021             | 0.339                        | 0.80       |
| 12   | Growth Rate ~ Intercept + GMP + DT.h + PREC.k15d + T.sd15d + GDD15d + NDVI15d                  | 1.646          | 0.021             | 0.359                        | 0.80       |
| 13   | Growth Rate ~ Intercept + GMP + DT.h + PREC + T.sd15d + T.night + NDVI15d                      | 1.686          | 0.020             | 0.378                        | 0.80       |
| 14   | Growth Rate ~ Intercept + GMP + DT.h + T.sd15d + T.night + NDVI15d                             | 1.703          | 0.020             | 0.398                        | 0.80       |
| 15   | Growth Rate ~ Intercept + GMP + DT.h + PREC.k15d + T.sd15d + NDVI15d                           | 1.724          | 0.020             | 0.417                        | 0.80       |
| 16   | Growth Rate ~ Intercept + GMP + DT.h + PREC + PREC.k15d + T.k15d + T.sd15d + GDD15d + NDVI15d  | 1.776          | 0.020             | 0.435                        | 0.80       |
| 17   | Growth Rate ~ Intercept + GMP + DT.h + PREC + PREC.k15d + T.sd15d + T.night + NDVI15d          | 1.854          | 0.019             | 0.453                        | 0.80       |
| 18   | Growth Rate ~ Intercept + DMI15d + GMP + DT.h + T.sd15d + NDVI15d                              | 1.996          | 0.018             | 0.470                        | 0.80       |
| 19   | Growth Rate ~ Intercept + DMI15d + GMP + DT.h + PREC + PREC.k15d + T.sd15d + GDD15d + NDVI15d  | 2.122          | 0.016             | 0.486                        | 0.80       |
| 20   | Growth Rate ~ Intercept + DMI15d + GMP + DT.h + PREC + PREC.k15d + T.k15d + T.sd15d + NDVI15d  | 2.132          | 0.016             | 0.501                        | 0.80       |
| 21   | Growth Rate ~ Intercept + GMP + DT.h + PREC.k15d + T.k15d + T.sd15d + NDVI15d                  | 2.199          | 0.016             | 0.516                        | 0.80       |
| 22   | Growth Rate ~ Intercept + GMP + DT.h + PREC + PREC.k15d + T.sd15d + T.night + GDD15d + NDVI15d | 2.369          | 0.015             | 0.530                        | 0.80       |
| 23   | Growth Rate ~ Intercept + GMP + DT.h + PREC + T.k15d + T.sd15d + GDD15d + NDVI15d              | 2.418          | 0.014             | 0.543                        | 0.80       |
| 24   | Growth Rate ~ Intercept + GMP + DT.h + PREC + PREC.k15d + T.k15d + T.sd15d + T.night + NDVI15d | 2.425          | 0.014             | 0.557                        | 0.80       |
| 25   | Growth Rate ~ Intercept + DMI15d + GMP + DT.h + PREC.k15d + T.sd15d + NDVI15d                  | 2.440          | 0.014             | 0.570                        | 0.80       |
| 26   | Growth Rate ~ Intercept + GMP + DT.h + T.k15d + T.sd15d + T.night + NDVI15d                    | 2.561          | 0.013             | 0.583                        | 0.80       |
| 27   | Growth Rate ~ Intercept + GMP + DT.h + T.k15d + T.sd15d + GDD15d + NDVI15d                     | 2.607          | 0.013             | 0.595                        | 0.80       |
| 28   | Growth Rate ~ Intercept + GMP + DT.h + PREC.k15d + T.sd15d + T.night + NDVI15d                 | 2.666          | 0.013             | 0.607                        | 0.80       |
| 29   | Growth Rate ~ Intercept + GMP + DT.h + PREC + T.sd15d + T.night + GDD15d + NDVI15d             | 2.668          | 0.013             | 0.619                        | 0.80       |
| 30   | Growth Rate ~ Intercept + DMI15d + GMP + DT.h + PREC + T.sd15d + GDD15d + NDVI15d              | 2.691          | 0.012             | 0.631                        | 0.80       |
| 31   | Growth Rate ~ Intercept + DMI15d + GMP + DT.h + PREC + PREC.k15d + T.sd15d + T.night + NDVI15d | 2.734          | 0.012             | 0.642                        | 0.80       |
| 32   | Growth Rate ~ Intercept + GMP + DT.h + T.sd15d + T.night + GDD15d + NDVI15d                    | 2.774          | 0.012             | 0.653                        | 0.80       |
| 33   | Growth Rate ~ Intercept + GMP + DT.h + PREC.k15d + T.k15d + T.sd15d + T.night + NDVI15d        | 2.881          | 0.011             | 0.664                        | 0.80       |
| 34   | Growth Rate ~ Intercept + GMP + DT.h + PREC + T.k15d + T.sd15d + T.night + NDVI15d             | 2.894          | 0.011             | 0.675                        | 0.80       |
| 35   | Growth Rate ~ Intercept + GMP + DT.h + PREC.k15d + T.k15d + T.sd15d + GDD15d + NDVI15d         | 2.953          | 0.011             | 0.685                        | 0.80       |
| 36   | Growth Rate ~ Intercept + DMI15d + GMP + DT.h + T.sd15d + GDD15d + NDVI15d                     | 3.023          | 0.010             | 0.695                        | 0.80       |
| 37   | Growth Rate ~ Intercept + DMI15d + GMP + DT.h + PREC + T.k15d + T.sd15d + NDVI15d              | 3.129          | 0.010             | 0.704                        | 0.80       |
| 38   | Growth Rate ~ Intercept + DMI15d + GMP + DT.h + T.sd15d + T.night + NDVI15d                    | 3.285          | 0.009             | 0.713                        | 0.80       |



2016

| Rank | Model                                                                                                            | $\Delta AIC_c$ | wAIC <sub>c</sub> | Cumulative wAIC <sub>c</sub> | $R_{LR}^2$ |
|------|------------------------------------------------------------------------------------------------------------------|----------------|-------------------|------------------------------|------------|
| 39   | Growth Rate ~ Intercept + DMI15d + GMP + DT.h + T.k15d + T.sd15d + NDVI15d                                       | 3.336          | 0.009             | 0.722                        | 0.80       |
| 40   | Growth Rate ~ Intercept + DMI15d + GMP + DT.h + PREC + T.sd15d + T.night + NDVI15d                               | 3.350          | 0.009             | 0.730                        | 0.80       |
| 41   | Growth Rate ~ Intercept + DMI15d + GMP + DT.h + PREC.k15d + T.k15d + T.sd15d + NDVI15d                           | 3.391          | 0.009             | 0.738                        | 0.80       |
| 42   | Growth Rate ~ Intercept + GMP + DT.h + PREC.k15d + T.sd15d + T.night + GDD15d + NDVI15d                          | 3.425          | 0.009             | 0.747                        | 0.80       |
| 43   | Growth Rate ~ Intercept + DMI15d + GMP + DT.h + PREC.k15d + T.sd15d + GDD15d + NDVI15d                           | 3.492          | 0.008             | 0.754                        | 0.80       |
| 44   | Growth Rate ~ Intercept + DMI15d + GMP + DT.h + PREC.k15d + T.sd15d + T.night + NDVI15d                          | 3.621          | 0.008             | 0.762                        | 0.80       |
| 45   | Growth Rate ~ Intercept + DMI15d + GMP + DT.h + PREC + PREC.k15d + T.k15d + T.sd15d + GDD15d + NDVI15d           | 3.649          | 0.008             | 0.769                        | 0.80       |
| 46   | Growth Rate ~ Intercept + GMP + DT.h + PREC + PREC.k15d + T.k15d + T.sd15d + T.night + GDD15d + NDVI15d          | 3.757          | 0.007             | 0.776                        | 0.80       |
| 47   | Growth Rate ~ Intercept + DMI15d + GMP + DT.h + PREC + PREC.k15d + T.k15d + T.sd15d + T.night + NDVI15d          | 3.766          | 0.007             | 0.783                        | 0.80       |
| 48   | Growth Rate ~ Intercept + GMP + DT.h + PREC + PREC.k15d + T.sd15d + GDD15d                                       | 3.779          | 0.007             | 0.790                        | 0.80       |
| 49   | Growth Rate ~ Intercept + GMP + DT.h + PREC + T.sd15d + GDD15d                                                   | 3.887          | 0.007             | 0.796                        | 0.80       |
| 50   | Growth Rate ~ Intercept + GMP + DT.h + T.sd15d + GDD15d                                                          | 4.055          | 0.006             | 0.802                        | 0.80       |
| 51   | Growth Rate ~ Intercept + GMP + DT.h + PREC + T.sd15d                                                            | 4.080          | 0.006             | 0.808                        | 0.80       |
| 52   | Growth Rate ~ Intercept + DMI15d + GMP + DT.h + PREC + PREC.k15d + T.sd15d + T.night + GDD15d + NDVI15d          | 4.181          | 0.006             | 0.814                        | 0.80       |
| 53   | Growth Rate ~ Intercept + GMP + DT.h + T.k15d + T.sd15d + T.night + GDD15d + NDVI15d                             | 4.228          | 0.006             | 0.819                        | 0.80       |
| 54   | Growth Rate ~ Intercept + DMI15d + GMP + DT.h + PREC.k15d + T.k15d + T.sd15d + T.night + NDVI15d                 | 4.320          | 0.005             | 0.824                        | 0.80       |
| 55   | Growth Rate ~ Intercept + GMP + DT.h + PREC + T.k15d + T.sd15d + T.night + GDD15d + NDVI15d                      | 4.412          | 0.005             | 0.829                        | 0.80       |
| 56   | Growth Rate ~ Intercept + GMP + DT.h + PREC.k15d + T.k15d + T.sd15d + T.night + GDD15d + NDVI15d                 | 4.451          | 0.005             | 0.834                        | 0.80       |
| 57   | Growth Rate ~ Intercept + DMI15d + GMP + DT.h + T.k15d + T.sd15d + T.night + NDVI15d                             | 4.451          | 0.005             | 0.839                        | 0.80       |
| 58   | Growth Rate ~ Intercept + GMP + DT.h + T.sd15d                                                                   | 4.504          | 0.005             | 0.844                        | 0.80       |
| 59   | Growth Rate ~ Intercept + DMI15d + GMP + DT.h + PREC + T.k15d + T.sd15d + GDD15d + NDVI15d                       | 4.510          | 0.005             | 0.849                        | 0.80       |
| 60   | Growth Rate ~ Intercept + GMP + DT.h + PREC + PREC.k15d + T.sd15d                                                | 4.600          | 0.005             | 0.853                        | 0.80       |
| 61   | Growth Rate ~ Intercept + DMI15d + GMP + DT.h + T.k15d + T.sd15d + GDD15d + NDVI15d                              | 4.686          | 0.005             | 0.857                        | 0.80       |
| 62   | Growth Rate ~ Intercept + DMI15d + GMP + DT.h + PREC + T.sd15d + T.night + GDD15d + NDVI15d                      | 4.748          | 0.004             | 0.862                        | 0.80       |
| 63   | Growth Rate ~ Intercept + DMI15d + GMP + DT.h + PREC + T.k15d + T.sd15d + T.night + NDVI15d                      | 4.801          | 0.004             | 0.866                        | 0.80       |
| 64   | Growth Rate ~ Intercept + DMI15d + GMP + DT.h + T.sd15d + T.night + GDD15d + NDVI15d                             | 4.816          | 0.004             | 0.870                        | 0.80       |
| 65   | Growth Rate ~ Intercept + DMI15d + GMP + DT.h + PREC.k15d + T.k15d + T.sd15d + GDD15d + NDVI15d                  | 4.849          | 0.004             | 0.874                        | 0.80       |
| 66   | Growth Rate ~ Intercept + GMP + DT.h + PREC.k15d + T.sd15d + GDD15d                                              | 4.850          | 0.004             | 0.878                        | 0.80       |
| 67   | Growth Rate ~ Intercept + GMP + DT.h + PREC + PREC.k15d + T.k15d + T.sd15d                                       | 4.883          | 0.004             | 0.882                        | 0.80       |
| 68   | Growth Rate ~ Intercept + GMP + DT.h + PREC + T.k15d + T.sd15d                                                   | 5.004          | 0.004             | 0.885                        | 0.80       |
| 69   | Growth Rate ~ Intercept + DMI15d + GMP + DT.h + PREC + PREC.k15d + T.sd15d                                       | 5.005          | 0.004             | 0.889                        | 0.80       |
| 70   | Growth Rate ~ Intercept + GMP + DT.h + PREC + PREC.k15d + T.k15d + T.sd15d + GDD15d                              | 5.076          | 0.004             | 0.893                        | 0.80       |
| 71   | Growth Rate ~ Intercept + GMP + DT.h + T.k15d + T.sd15d                                                          | 5.084          | 0.004             | 0.896                        | 0.80       |
| 72   | Growth Rate ~ Intercept + DMI15d + GMP + DT.h + PREC.k15d + T.sd15d + T.night + GDD15d + NDVI15d                 | 5.210          | 0.004             | 0.900                        | 0.80       |
| 73   | Growth Rate ~ Intercept + DMI15d + GMP + DT.h + PREC + T.sd15d                                                   | 5.403          | 0.003             | 0.903                        | 0.80       |
| 74   | Growth Rate ~ Intercept + GMP + DT.h + T.k15d + T.sd15d + GDD15d                                                 | 5.540          | 0.003             | 0.905                        | 0.80       |
| 75   | Growth Rate ~ Intercept + GMP + DT.h + PREC + T.k15d + T.sd15d + GDD15d                                          | 5.553          | 0.003             | 0.908                        | 0.80       |
| 76   | Growth Rate ~ Intercept + DMI15d + GMP + DT.h + PREC + PREC.k15d + T.k15d + T.sd15d + T.night + GDD15d + NDVI15d | 5.599          | 0.003             | 0.911                        | 0.80       |

2016

| Rank | Model                                                                                | $\Delta AIC_c$ | wAIC <sub>c</sub> | Cumulative wAIC <sub>c</sub> | $R_{LR}^2$ |
|------|--------------------------------------------------------------------------------------|----------------|-------------------|------------------------------|------------|
| 77   | Growth Rate ~ Intercept + DMI15d + GMP + DT.h + PREC + PREC.k15d + T.sd15d + GDD15d  | 5.628          | 0.003             | 0.914                        | 0.80       |
| 78   | Growth Rate ~ Intercept + GMP + DT.h + T.sd15d + T.night                             | 5.643          | 0.003             | 0.916                        | 0.80       |
| 79   | Growth Rate ~ Intercept + DMI15d + GMP + DT.h + T.sd15d                              | 5.646          | 0.003             | 0.919                        | 0.80       |
| 80   | Growth Rate ~ Intercept + GMP + DT.h + PREC + T.sd15d + T.night                      | 5.769          | 0.003             | 0.922                        | 0.80       |
| 81   | Growth Rate ~ Intercept + GMP + DT.h + PREC.k15d + T.sd15d                           | 5.804          | 0.003             | 0.924                        | 0.80       |
| 82   | Growth Rate ~ Intercept + GMP + DT.h + PREC.k15d + T.k15d + T.sd15d                  | 5.810          | 0.003             | 0.926                        | 0.80       |
| 83   | Growth Rate ~ Intercept + DMI15d + GMP + DT.h + PREC + PREC.k15d + T.k15d + T.sd15d  | 5.851          | 0.003             | 0.929                        | 0.80       |
| 84   | Growth Rate ~ Intercept + GMP + DT.h + PREC + PREC.k15d + T.sd15d + T.night + GDD15d | 5.867          | 0.003             | 0.931                        | 0.80       |
| 85   | Growth Rate ~ Intercept + DMI15d + GMP + DT.h + PREC + T.sd15d + GDD15d              | 5.963          | 0.002             | 0.934                        | 0.80       |
| 86   | Growth Rate ~ Intercept + GMP + DT.h + PREC + T.sd15d + T.night + GDD15d             | 5.968          | 0.002             | 0.936                        | 0.80       |
| 87   | Growth Rate ~ Intercept + GMP + DT.h + PREC.k15d + T.k15d + T.sd15d + GDD15d         | 5.971          | 0.002             | 0.938                        | 0.80       |
| 88   | Growth Rate ~ Intercept + GMP + DT.h + T.sd15d + T.night + GDD15d                    | 5.986          | 0.002             | 0.940                        | 0.80       |
| 89   | Growth Rate ~ Intercept + GMP + DT.h + T.k15d + T.sd15d + T.night                    | 6.053          | 0.002             | 0.943                        | 0.80       |
| 90   | Growth Rate ~ Intercept + DMI15d + GMP + DT.h + T.sd15d + GDD15d                     | 6.110          | 0.002             | 0.945                        | 0.80       |
| 91   | Growth Rate ~ Intercept + DMI15d + GMP + DT.h + PREC.k15d + T.sd15d                  | 6.218          | 0.002             | 0.947                        | 0.80       |
| 92   | Growth Rate ~ Intercept + GMP + DT.h + PREC + PREC.k15d + T.sd15d + T.night          | 6.235          | 0.002             | 0.949                        | 0.80       |

2017

| Rank | Model                                                                         | $\Delta AIC_c$ | wAIC <sub>c</sub> | Cumulative wAIC <sub>c</sub> | $R_{LR}^2$ |
|------|-------------------------------------------------------------------------------|----------------|-------------------|------------------------------|------------|
| 1    | Growth Rate ~ Intercept + GMP + DT.h + T.night                                | 0.000          | 0.024             | 0.023                        | 0.77       |
| 2    | Growth Rate ~ Intercept + GMP + DT.h                                          | 0.362          | 0.020             | 0.042                        | 0.77       |
| 3    | Growth Rate ~ Intercept + GMP + DT.h + T.night + NDVI15d                      | 0.457          | 0.019             | 0.060                        | 0.77       |
| 4    | Growth Rate ~ Intercept + GMP + DT.h + NDVI15d                                | 0.661          | 0.017             | 0.076                        | 0.77       |
| 5    | Growth Rate ~ Intercept + DMI15d + GMP + DT.h + NDVI15d                       | 0.704          | 0.017             | 0.092                        | 0.77       |
| 6    | Growth Rate ~ Intercept + GMP + DT.h + GDD15d                                 | 0.726          | 0.017             | 0.108                        | 0.77       |
| 7    | Growth Rate ~ Intercept + DMI15d + GMP + DT.h + T.night                       | 0.732          | 0.017             | 0.124                        | 0.77       |
| 8    | Growth Rate ~ Intercept + GMP + DT.h + T.night + GDD15d                       | 0.780          | 0.016             | 0.139                        | 0.77       |
| 9    | Growth Rate ~ Intercept + DMI15d + GMP + DT.h + T.night + NDVI15d             | 0.801          | 0.016             | 0.154                        | 0.77       |
| 10   | Growth Rate ~ Intercept + DMI15d + GMP + DT.h                                 | 0.837          | 0.016             | 0.169                        | 0.77       |
| 11   | Growth Rate ~ Intercept + GMP + DT.h + GDD15d + NDVI15d                       | 0.910          | 0.015             | 0.184                        | 0.77       |
| 12   | Growth Rate ~ Intercept + DMI15d + GMP + DT.h + T.sd15d + NDVI15d             | 1.011          | 0.014             | 0.198                        | 0.77       |
| 13   | Growth Rate ~ Intercept + GMP + DT.h + T.night + GDD15d + NDVI15d             | 1.135          | 0.014             | 0.211                        | 0.77       |
| 14   | Growth Rate ~ Intercept + DMI15d + GMP + DT.h + T.sd15d                       | 1.578          | 0.011             | 0.221                        | 0.77       |
| 15   | Growth Rate ~ Intercept + GMP + DT.h + T.sd15d                                | 1.666          | 0.010             | 0.231                        | 0.77       |
| 16   | Growth Rate ~ Intercept + DMI15d + GMP + DT.h + PREC.k15d + T.night           | 1.682          | 0.010             | 0.241                        | 0.77       |
| 17   | Growth Rate ~ Intercept + GMP + DT.h + PREC.k15d + T.night                    | 1.725          | 0.010             | 0.250                        | 0.77       |
| 18   | Growth Rate ~ Intercept + GMP + DT.h + T.sd15d + NDVI15d                      | 1.742          | 0.010             | 0.260                        | 0.77       |
| 19   | Growth Rate ~ Intercept + DMI15d + GMP + DT.h + PREC.k15d                     | 1.803          | 0.010             | 0.269                        | 0.77       |
| 20   | Growth Rate ~ Intercept + DMI15d + GMP + DT.h + GDD15d + NDVI15d              | 1.869          | 0.009             | 0.278                        | 0.77       |
| 21   | Growth Rate ~ Intercept + GMP + DT.h + PREC                                   | 1.871          | 0.009             | 0.287                        | 0.77       |
| 22   | Growth Rate ~ Intercept + GMP + DT.h + T.k15d + T.night                       | 1.878          | 0.009             | 0.296                        | 0.77       |
| 23   | Growth Rate ~ Intercept + GMP + DT.h + T.sd15d + T.night                      | 1.882          | 0.009             | 0.305                        | 0.77       |
| 24   | Growth Rate ~ Intercept + DMI15d + GMP + DT.h + PREC.k15d + NDVI15d           | 1.905          | 0.009             | 0.313                        | 0.77       |
| 25   | Growth Rate ~ Intercept + DMI15d + GMP + DT.h + PREC.k15d + T.night + NDVI15d | 1.979          | 0.009             | 0.322                        | 0.77       |
| 26   | Growth Rate ~ Intercept + DMI15d + GMP + DT.h + GDD15d                        | 1.992          | 0.009             | 0.330                        | 0.77       |
| 27   | Growth Rate ~ Intercept + GMP + DT.h + PREC + T.night                         | 2.005          | 0.009             | 0.339                        | 0.77       |
| 28   | Growth Rate ~ Intercept + DMI15d + GMP + DT.h + T.sd15d + T.night + NDVI15d   | 2.016          | 0.009             | 0.347                        | 0.77       |
| 29   | Growth Rate ~ Intercept + GMP + DT.h + PREC + NDVI15d                         | 2.067          | 0.009             | 0.355                        | 0.77       |
| 30   | Growth Rate ~ Intercept + DMI15d + GMP + DT.h + T.night + GDD15d              | 2.135          | 0.008             | 0.363                        | 0.77       |
| 31   | Growth Rate ~ Intercept + GMP + DT.h + PREC.k15d                              | 2.136          | 0.008             | 0.371                        | 0.77       |
| 32   | Growth Rate ~ Intercept + GMP + DT.h + PREC.k15d + GDD15d                     | 2.201          | 0.008             | 0.378                        | 0.77       |
| 33   | Growth Rate ~ Intercept + GMP + DT.h + T.sd15d + T.night + NDVI15d            | 2.204          | 0.008             | 0.386                        | 0.77       |
| 34   | Growth Rate ~ Intercept + DMI15d + GMP + DT.h + T.night + GDD15d + NDVI15d    | 2.208          | 0.008             | 0.393                        | 0.77       |

2017

| Rank | Model                                                                         | $\Delta AIC_c$ | wAIC <sub>c</sub> | Cumulative wAIC <sub>c</sub> | $R_{LR}^2$ |
|------|-------------------------------------------------------------------------------|----------------|-------------------|------------------------------|------------|
| 35   | Growth Rate ~ Intercept + GMP + DT.h + PREC.k15d + T.night + GDD15d           | 2.239          | 0.008             | 0.401                        | 0.77       |
| 36   | Growth Rate ~ Intercept + DMI15d + GMP + DT.h + T.sd15d + T.night             | 2.276          | 0.008             | 0.408                        | 0.77       |
| 37   | Growth Rate ~ Intercept + GMP + DT.h + T.k15d                                 | 2.290          | 0.008             | 0.415                        | 0.77       |
| 38   | Growth Rate ~ Intercept + GMP + DT.h + PREC + GDD15d                          | 2.298          | 0.008             | 0.422                        | 0.77       |
| 39   | Growth Rate ~ Intercept + DMI15d + GMP + DT.h + PREC.k15d + T.sd15d + NDVI15d | 2.320          | 0.008             | 0.430                        | 0.77       |
| 40   | Growth Rate ~ Intercept + GMP + DT.h + PREC.k15d + T.night + NDVI15d          | 2.340          | 0.007             | 0.437                        | 0.77       |
| 41   | Growth Rate ~ Intercept + GMP + DT.h + T.k15d + T.night + NDVI15d             | 2.365          | 0.007             | 0.444                        | 0.77       |
| 42   | Growth Rate ~ Intercept + GMP + DT.h + PREC + GDD15d + NDVI15d                | 2.382          | 0.007             | 0.451                        | 0.77       |
| 43   | Growth Rate ~ Intercept + GMP + DT.h + PREC + T.night + NDVI15d               | 2.412          | 0.007             | 0.457                        | 0.77       |
| 44   | Growth Rate ~ Intercept + DMI15d + GMP + DT.h + T.k15d + T.night              | 2.420          | 0.007             | 0.464                        | 0.77       |
| 45   | Growth Rate ~ Intercept + DMI15d + GMP + DT.h + PREC + NDVI15d                | 2.423          | 0.007             | 0.471                        | 0.77       |
| 46   | Growth Rate ~ Intercept + DMI15d + GMP + DT.h + T.k15d + NDVI15d              | 2.459          | 0.007             | 0.478                        | 0.77       |
| 47   | Growth Rate ~ Intercept + DMI15d + GMP + DT.h + T.k15d + T.night + NDVI15d    | 2.508          | 0.007             | 0.484                        | 0.77       |
| 48   | Growth Rate ~ Intercept + GMP + DT.h + T.sd15d + GDD15d                       | 2.559          | 0.007             | 0.490                        | 0.77       |
| 49   | Growth Rate ~ Intercept + DMI15d + GMP + DT.h + T.k15d                        | 2.574          | 0.007             | 0.497                        | 0.77       |
| 50   | Growth Rate ~ Intercept + GMP + DT.h + PREC.k15d + NDVI15d                    | 2.585          | 0.007             | 0.503                        | 0.77       |
| 51   | Growth Rate ~ Intercept + GMP + DT.h + PREC.k15d + GDD15d + NDVI15d           | 2.592          | 0.007             | 0.509                        | 0.77       |
| 52   | Growth Rate ~ Intercept + DMI15d + GMP + DT.h + PREC                          | 2.603          | 0.007             | 0.515                        | 0.77       |
| 53   | Growth Rate ~ Intercept + GMP + DT.h + T.k15d + NDVI15d                       | 2.616          | 0.006             | 0.521                        | 0.77       |
| 54   | Growth Rate ~ Intercept + GMP + DT.h + T.sd15d + GDD15d + NDVI15d             | 2.623          | 0.006             | 0.528                        | 0.77       |
| 55   | Growth Rate ~ Intercept + DMI15d + GMP + DT.h + PREC.k15d + T.sd15d           | 2.631          | 0.006             | 0.534                        | 0.77       |
| 56   | Growth Rate ~ Intercept + GMP + DT.h + T.k15d + GDD15d                        | 2.706          | 0.006             | 0.540                        | 0.77       |
| 57   | Growth Rate ~ Intercept + GMP + DT.h + T.k15d + T.night + GDD15d              | 2.717          | 0.006             | 0.545                        | 0.77       |
| 58   | Growth Rate ~ Intercept + GMP + DT.h + PREC + T.night + GDD15d                | 2.789          | 0.006             | 0.551                        | 0.77       |
| 59   | Growth Rate ~ Intercept + GMP + DT.h + PREC.k15d + T.night + GDD15d + NDVI15d | 2.798          | 0.006             | 0.557                        | 0.77       |
| 60   | Growth Rate ~ Intercept + DMI15d + GMP + DT.h + PREC + T.night                | 2.809          | 0.006             | 0.562                        | 0.77       |
| 61   | Growth Rate ~ Intercept + DMI15d + GMP + DT.h + PREC.k15d + GDD15d            | 2.819          | 0.006             | 0.568                        | 0.77       |
| 62   | Growth Rate ~ Intercept + GMP + DT.h + T.sd15d + T.night + GDD15d             | 2.852          | 0.006             | 0.573                        | 0.77       |
| 63   | Growth Rate ~ Intercept + DMI15d + GMP + DT.h + PREC + T.night + NDVI15d      | 2.865          | 0.006             | 0.579                        | 0.77       |
| 64   | Growth Rate ~ Intercept + DMI15d + GMP + DT.h + T.sd15d + GDD15d + NDVI15d    | 2.891          | 0.006             | 0.584                        | 0.77       |
| 65   | Growth Rate ~ Intercept + DMI15d + GMP + DT.h + T.k15d + T.sd15d + NDVI15d    | 2.895          | 0.006             | 0.589                        | 0.77       |
| 66   | Growth Rate ~ Intercept + GMP + DT.h + T.k15d + GDD15d + NDVI15d              | 2.912          | 0.006             | 0.595                        | 0.77       |
| 67   | Growth Rate ~ Intercept + DMI15d + GMP + DT.h + PREC + T.sd15d + NDVI15d      | 2.922          | 0.006             | 0.600                        | 0.77       |
| 68   | Growth Rate ~ Intercept + DMI15d + GMP + DT.h + PREC.k15d + GDD15d + NDVI15d  | 2.934          | 0.006             | 0.605                        | 0.77       |

2017

| Rank | Model                                                                                   | $\Delta AIC_c$ | wAIC <sub>c</sub> | Cumulative wAIC <sub>c</sub> | $R_{LR}^2$ |
|------|-----------------------------------------------------------------------------------------|----------------|-------------------|------------------------------|------------|
| 69   | Growth Rate ~ Intercept + DMI15d + GMP + DT.h + PREC.k15d + T.night + GDD15d            | 2.971          | 0.005             | 0.610                        | 0.77       |
| 70   | Growth Rate ~ Intercept + GMP + DT.h + PREC + T.night + GDD15d + NDVI15d                | 3.091          | 0.005             | 0.615                        | 0.77       |
| 71   | Growth Rate ~ Intercept + GMP + DT.h + T.k15d + T.night + GDD15d + NDVI15d              | 3.100          | 0.005             | 0.620                        | 0.77       |
| 72   | Growth Rate ~ Intercept + GMP + DT.h + T.sd15d + T.night + GDD15d + NDVI15d             | 3.164          | 0.005             | 0.625                        | 0.77       |
| 73   | Growth Rate ~ Intercept + DMI15d + GMP + DT.h + PREC.k15d + T.night + GDD15d + NDVI15d  | 3.272          | 0.005             | 0.629                        | 0.77       |
| 74   | Growth Rate ~ Intercept + DMI15d + GMP + DT.h + PREC.k15d + T.sd15d + T.night + NDVI15d | 3.282          | 0.005             | 0.634                        | 0.77       |
| 75   | Growth Rate ~ Intercept + DMI15d + GMP + DT.h + PREC.k15d + T.sd15d + T.night           | 3.290          | 0.005             | 0.638                        | 0.77       |
| 76   | Growth Rate ~ Intercept + GMP + DT.h + PREC + T.sd15d + NDVI15d                         | 3.304          | 0.005             | 0.642                        | 0.77       |
| 77   | Growth Rate ~ Intercept + GMP + DT.h + PREC + T.sd15d                                   | 3.306          | 0.005             | 0.647                        | 0.77       |
| 78   | Growth Rate ~ Intercept + DMI15d + GMP + DT.h + T.sd15d + GDD15d                        | 3.367          | 0.004             | 0.651                        | 0.77       |
| 79   | Growth Rate ~ Intercept + DMI15d + GMP + DT.h + PREC.k15d + T.k15d + T.night            | 3.368          | 0.004             | 0.655                        | 0.77       |
| 80   | Growth Rate ~ Intercept + DMI15d + GMP + DT.h + T.k15d + T.sd15d                        | 3.432          | 0.004             | 0.659                        | 0.77       |
| 81   | Growth Rate ~ Intercept + DMI15d + GMP + DT.h + PREC + T.sd15d                          | 3.503          | 0.004             | 0.663                        | 0.77       |
| 82   | Growth Rate ~ Intercept + GMP + DT.h + PREC.k15d + T.sd15d                              | 3.531          | 0.004             | 0.667                        | 0.77       |
| 83   | Growth Rate ~ Intercept + DMI15d + GMP + DT.h + PREC.k15d + T.k15d                      | 3.539          | 0.004             | 0.671                        | 0.77       |
| 84   | Growth Rate ~ Intercept + DMI15d + GMP + DT.h + PREC + PREC.k15d                        | 3.551          | 0.004             | 0.675                        | 0.77       |
| 85   | Growth Rate ~ Intercept + DMI15d + GMP + DT.h + PREC + GDD15d + NDVI15d                 | 3.569          | 0.004             | 0.679                        | 0.77       |
| 86   | Growth Rate ~ Intercept + GMP + DT.h + PREC + PREC.k15d                                 | 3.586          | 0.004             | 0.682                        | 0.77       |
| 87   | Growth Rate ~ Intercept + DMI15d + GMP + DT.h + PREC + PREC.k15d + NDVI15d              | 3.611          | 0.004             | 0.686                        | 0.77       |
| 88   | Growth Rate ~ Intercept + GMP + DT.h + PREC.k15d + T.k15d + T.night                     | 3.633          | 0.004             | 0.690                        | 0.77       |
| 89   | Growth Rate ~ Intercept + DMI15d + GMP + DT.h + PREC.k15d + T.k15d + NDVI15d            | 3.659          | 0.004             | 0.694                        | 0.77       |
| 90   | Growth Rate ~ Intercept + GMP + DT.h + PREC.k15d + T.sd15d + T.night                    | 3.666          | 0.004             | 0.697                        | 0.77       |
| 91   | Growth Rate ~ Intercept + GMP + DT.h + T.k15d + T.sd15d                                 | 3.669          | 0.004             | 0.701                        | 0.77       |
| 92   | Growth Rate ~ Intercept + DMI15d + GMP + DT.h + PREC.k15d + T.k15d + T.night + NDVI15d  | 3.685          | 0.004             | 0.704                        | 0.77       |
| 93   | Growth Rate ~ Intercept + GMP + DT.h + PREC + PREC.k15d + GDD15d                        | 3.694          | 0.004             | 0.708                        | 0.77       |
| 94   | Growth Rate ~ Intercept + GMP + DT.h + PREC + PREC.k15d + T.night                       | 3.711          | 0.004             | 0.712                        | 0.77       |
| 95   | Growth Rate ~ Intercept + DMI15d + GMP + DT.h + T.k15d + GDD15d + NDVI15d               | 3.733          | 0.004             | 0.715                        | 0.77       |
| 96   | Growth Rate ~ Intercept + DMI15d + GMP + DT.h + PREC + GDD15d                           | 3.742          | 0.004             | 0.719                        | 0.77       |
| 97   | Growth Rate ~ Intercept + GMP + DT.h + PREC.k15d + T.sd15d + NDVI15d                    | 3.745          | 0.004             | 0.722                        | 0.77       |
| 98   | Growth Rate ~ Intercept + DMI15d + GMP + DT.h + PREC + PREC.k15d + T.night              | 3.761          | 0.004             | 0.726                        | 0.77       |
| 99   | Growth Rate ~ Intercept + GMP + DT.h + T.k15d + T.sd15d + NDVI15d                       | 3.774          | 0.004             | 0.729                        | 0.77       |
| 100  | Growth Rate ~ Intercept + GMP + DT.h + PREC + T.k15d                                    | 3.811          | 0.004             | 0.732                        | 0.77       |
| 101  | Growth Rate ~ Intercept + GMP + DT.h + T.k15d + T.sd15d + T.night                       | 3.815          | 0.004             | 0.736                        | 0.77       |
| 102  | Growth Rate ~ Intercept + DMI15d + GMP + DT.h + T.k15d + T.sd15d + T.night + NDVI15d    | 3.839          | 0.004             | 0.739                        | 0.77       |

2017

| Rank | Model                                                                                  | $\Delta AIC_c$ | wAIC <sub>c</sub> | Cumulative wAIC <sub>c</sub> | $R_{LR}^2$ |
|------|----------------------------------------------------------------------------------------|----------------|-------------------|------------------------------|------------|
| 103  | Growth Rate ~ Intercept + DMI15d + GMP + DT.h + T.k15d + GDD15d                        | 3.843          | 0.004             | 0.742                        | 0.77       |
| 104  | Growth Rate ~ Intercept + DMI15d + GMP + DT.h + T.sd15d + T.night + GDD15d + NDVI15d   | 3.863          | 0.003             | 0.746                        | 0.77       |
| 105  | Growth Rate ~ Intercept + GMP + DT.h + PREC + T.k15d + T.night                         | 3.895          | 0.003             | 0.749                        | 0.77       |
| 106  | Growth Rate ~ Intercept + GMP + DT.h + PREC + T.sd15d + T.night                        | 3.897          | 0.003             | 0.752                        | 0.77       |
| 107  | Growth Rate ~ Intercept + DMI15d + GMP + DT.h + T.k15d + T.night + GDD15d              | 3.933          | 0.003             | 0.755                        | 0.77       |
| 108  | Growth Rate ~ Intercept + GMP + DT.h + PREC + PREC.k15d + NDVI15d                      | 3.949          | 0.003             | 0.759                        | 0.77       |
| 109  | Growth Rate ~ Intercept + GMP + DT.h + PREC + PREC.k15d + GDD15d + NDVI15d             | 3.999          | 0.003             | 0.762                        | 0.77       |
| 110  | Growth Rate ~ Intercept + DMI15d + GMP + DT.h + T.k15d + T.night + GDD15d + NDVI15d    | 4.021          | 0.003             | 0.765                        | 0.77       |
| 111  | Growth Rate ~ Intercept + DMI15d + GMP + DT.h + T.sd15d + T.night + GDD15d             | 4.023          | 0.003             | 0.768                        | 0.77       |
| 112  | Growth Rate ~ Intercept + GMP + DT.h + PREC + T.k15d + NDVI15d                         | 4.033          | 0.003             | 0.771                        | 0.77       |
| 113  | Growth Rate ~ Intercept + DMI15d + GMP + DT.h + PREC + PREC.k15d + T.night + NDVI15d   | 4.044          | 0.003             | 0.774                        | 0.77       |
| 114  | Growth Rate ~ Intercept + DMI15d + GMP + DT.h + T.k15d + T.sd15d + T.night             | 4.059          | 0.003             | 0.777                        | 0.77       |
| 115  | Growth Rate ~ Intercept + GMP + DT.h + PREC.k15d + T.k15d                              | 4.090          | 0.003             | 0.780                        | 0.77       |
| 116  | Growth Rate ~ Intercept + DMI15d + GMP + DT.h + PREC + T.sd15d + T.night + NDVI15d     | 4.099          | 0.003             | 0.783                        | 0.77       |
| 117  | Growth Rate ~ Intercept + DMI15d + GMP + DT.h + PREC.k15d + T.sd15d + GDD15d + NDVI15d | 4.114          | 0.003             | 0.786                        | 0.77       |
| 118  | Growth Rate ~ Intercept + GMP + DT.h + PREC.k15d + T.sd15d + GDD15d                    | 4.146          | 0.003             | 0.788                        | 0.77       |
| 119  | Growth Rate ~ Intercept + GMP + DT.h + PREC.k15d + T.sd15d + T.night + NDVI15d         | 4.152          | 0.003             | 0.791                        | 0.77       |
| 120  | Growth Rate ~ Intercept + GMP + DT.h + PREC + T.sd15d + T.night + NDVI15d              | 4.170          | 0.003             | 0.794                        | 0.77       |
| 121  | Growth Rate ~ Intercept + GMP + DT.h + T.k15d + T.sd15d + T.night + NDVI15d            | 4.178          | 0.003             | 0.797                        | 0.77       |
| 122  | Growth Rate ~ Intercept + GMP + DT.h + PREC + T.sd15d + GDD15d + NDVI15d               | 4.186          | 0.003             | 0.800                        | 0.77       |
| 123  | Growth Rate ~ Intercept + DMI15d + GMP + DT.h + PREC.k15d + T.k15d + T.sd15d + NDVI15d | 4.200          | 0.003             | 0.803                        | 0.77       |
| 124  | Growth Rate ~ Intercept + GMP + DT.h + PREC + T.sd15d + GDD15d                         | 4.202          | 0.003             | 0.805                        | 0.77       |
| 125  | Growth Rate ~ Intercept + DMI15d + GMP + DT.h + PREC + T.night + GDD15d                | 4.207          | 0.003             | 0.808                        | 0.77       |
| 126  | Growth Rate ~ Intercept + DMI15d + GMP + DT.h + PREC + T.k15d + NDVI15d                | 4.209          | 0.003             | 0.811                        | 0.77       |
| 127  | Growth Rate ~ Intercept + GMP + DT.h + PREC.k15d + T.k15d + GDD15d                     | 4.211          | 0.003             | 0.814                        | 0.77       |
| 128  | Growth Rate ~ Intercept + GMP + DT.h + PREC.k15d + T.k15d + T.night + GDD15d           | 4.213          | 0.003             | 0.816                        | 0.77       |
| 129  | Growth Rate ~ Intercept + DMI15d + GMP + DT.h + PREC + PREC.k15d + T.sd15d + NDVI15d   | 4.218          | 0.003             | 0.819                        | 0.77       |
| 130  | Growth Rate ~ Intercept + GMP + DT.h + PREC + PREC.k15d + T.night + GDD15d             | 4.219          | 0.003             | 0.822                        | 0.77       |
| 131  | Growth Rate ~ Intercept + DMI15d + GMP + DT.h + PREC + T.night + GDD15d + NDVI15d      | 4.261          | 0.003             | 0.825                        | 0.77       |
| 132  | Growth Rate ~ Intercept + GMP + DT.h + PREC.k15d + T.k15d + T.night + NDVI15d          | 4.271          | 0.003             | 0.827                        | 0.77       |
| 133  | Growth Rate ~ Intercept + GMP + DT.h + PREC + PREC.k15d + T.night + NDVI15d            | 4.280          | 0.003             | 0.830                        | 0.77       |
| 134  | Growth Rate ~ Intercept + GMP + DT.h + PREC + T.k15d + GDD15d                          | 4.287          | 0.003             | 0.833                        | 0.77       |
| 135  | Growth Rate ~ Intercept + DMI15d + GMP + DT.h + PREC.k15d + T.sd15d + GDD15d           | 4.319          | 0.003             | 0.835                        | 0.77       |
| 136  | Growth Rate ~ Intercept + GMP + DT.h + PREC + T.k15d + T.night + NDVI15d               | 4.333          | 0.003             | 0.838                        | 0.77       |

2017

| Rank | Model                                                                                            | $\Delta AIC_c$ | wAIC <sub>c</sub> | Cumulative wAIC <sub>c</sub> | $R_{LR}^2$ |
|------|--------------------------------------------------------------------------------------------------|----------------|-------------------|------------------------------|------------|
| 137  | Growth Rate ~ Intercept + GMP + DT.h + PREC.k15d + T.sd15d + T.night + GDD15d                    | 4.335          | 0.003             | 0.841                        | 0.77       |
| 138  | Growth Rate ~ Intercept + DMI15d + GMP + DT.h + PREC + T.sd15d + T.night                         | 4.366          | 0.003             | 0.843                        | 0.77       |
| 139  | Growth Rate ~ Intercept + DMI15d + GMP + DT.h + PREC + T.k15d                                    | 4.371          | 0.003             | 0.846                        | 0.77       |
| 140  | Growth Rate ~ Intercept + GMP + DT.h + PREC + T.k15d + GDD15d + NDVI15d                          | 4.394          | 0.003             | 0.848                        | 0.77       |
| 141  | Growth Rate ~ Intercept + GMP + DT.h + PREC.k15d + T.sd15d + GDD15d + NDVI15d                    | 4.426          | 0.003             | 0.851                        | 0.77       |
| 142  | Growth Rate ~ Intercept + DMI15d + GMP + DT.h + PREC.k15d + T.k15d + T.sd15d                     | 4.480          | 0.003             | 0.853                        | 0.77       |
| 143  | Growth Rate ~ Intercept + DMI15d + GMP + DT.h + PREC + T.k15d + T.night                          | 4.510          | 0.003             | 0.855                        | 0.77       |
| 144  | Growth Rate ~ Intercept + DMI15d + GMP + DT.h + PREC + PREC.k15d + T.sd15d                       | 4.539          | 0.002             | 0.858                        | 0.77       |
| 145  | Growth Rate ~ Intercept + DMI15d + GMP + DT.h + PREC + PREC.k15d + GDD15d                        | 4.546          | 0.002             | 0.860                        | 0.77       |
| 146  | Growth Rate ~ Intercept + GMP + DT.h + PREC.k15d + T.k15d + NDVI15d                              | 4.559          | 0.002             | 0.862                        | 0.77       |
| 147  | Growth Rate ~ Intercept + GMP + DT.h + T.k15d + T.sd15d + GDD15d                                 | 4.577          | 0.002             | 0.865                        | 0.77       |
| 148  | Growth Rate ~ Intercept + DMI15d + GMP + DT.h + PREC + T.k15d + T.night + NDVI15d                | 4.589          | 0.002             | 0.867                        | 0.77       |
| 149  | Growth Rate ~ Intercept + DMI15d + GMP + DT.h + PREC + PREC.k15d + GDD15d + NDVI15d              | 4.615          | 0.002             | 0.869                        | 0.77       |
| 150  | Growth Rate ~ Intercept + GMP + DT.h + PREC.k15d + T.k15d + GDD15d + NDVI15d                     | 4.619          | 0.002             | 0.872                        | 0.77       |
| 151  | Growth Rate ~ Intercept + GMP + DT.h + T.k15d + T.sd15d + GDD15d + NDVI15d                       | 4.667          | 0.002             | 0.874                        | 0.77       |
| 152  | Growth Rate ~ Intercept + DMI15d + GMP + DT.h + PREC.k15d + T.k15d + GDD15d                      | 4.674          | 0.002             | 0.876                        | 0.77       |
| 153  | Growth Rate ~ Intercept + GMP + DT.h + PREC + PREC.k15d + T.night + GDD15d + NDVI15d             | 4.726          | 0.002             | 0.878                        | 0.77       |
| 154  | Growth Rate ~ Intercept + GMP + DT.h + PREC + T.k15d + T.night + GDD15d                          | 4.738          | 0.002             | 0.880                        | 0.77       |
| 155  | Growth Rate ~ Intercept + DMI15d + GMP + DT.h + PREC + T.sd15d + GDD15d + NDVI15d                | 4.772          | 0.002             | 0.882                        | 0.77       |
| 156  | Growth Rate ~ Intercept + DMI15d + GMP + DT.h + PREC.k15d + T.k15d + T.night + GDD15d            | 4.773          | 0.002             | 0.884                        | 0.77       |
| 157  | Growth Rate ~ Intercept + GMP + DT.h + PREC.k15d + T.k15d + T.night + GDD15d + NDVI15d           | 4.793          | 0.002             | 0.887                        | 0.77       |
| 158  | Growth Rate ~ Intercept + DMI15d + GMP + DT.h + PREC.k15d + T.k15d + GDD15d + NDVI15d            | 4.802          | 0.002             | 0.889                        | 0.77       |
| 159  | Growth Rate ~ Intercept + GMP + DT.h + T.k15d + T.sd15d + T.night + GDD15d                       | 4.807          | 0.002             | 0.891                        | 0.77       |
| 160  | Growth Rate ~ Intercept + DMI15d + GMP + DT.h + T.k15d + T.sd15d + GDD15d + NDVI15d              | 4.811          | 0.002             | 0.893                        | 0.77       |
| 161  | Growth Rate ~ Intercept + DMI15d + GMP + DT.h + PREC + T.k15d + T.sd15d + NDVI15d                | 4.822          | 0.002             | 0.895                        | 0.77       |
| 162  | Growth Rate ~ Intercept + GMP + DT.h + PREC + T.sd15d + T.night + GDD15d                         | 4.870          | 0.002             | 0.897                        | 0.77       |
| 163  | Growth Rate ~ Intercept + GMP + DT.h + PREC.k15d + T.sd15d + T.night + GDD15d + NDVI15d          | 4.881          | 0.002             | 0.899                        | 0.77       |
| 164  | Growth Rate ~ Intercept + DMI15d + GMP + DT.h + PREC.k15d + T.sd15d + T.night + GDD15d           | 4.929          | 0.002             | 0.901                        | 0.77       |
| 165  | Growth Rate ~ Intercept + DMI15d + GMP + DT.h + PREC.k15d + T.sd15d + T.night + GDD15d + NDVI15d | 5.035          | 0.002             | 0.903                        | 0.77       |
| 166  | Growth Rate ~ Intercept + DMI15d + GMP + DT.h + PREC + PREC.k15d + T.night + GDD15d              | 5.042          | 0.002             | 0.904                        | 0.77       |
| 167  | Growth Rate ~ Intercept + DMI15d + GMP + DT.h + PREC.k15d + T.k15d + T.sd15d + T.night           | 5.066          | 0.002             | 0.906                        | 0.77       |
| 168  | Growth Rate ~ Intercept + GMP + DT.h + PREC + T.k15d + T.night + GDD15d + NDVI15d                | 5.069          | 0.002             | 0.908                        | 0.77       |
| 169  | Growth Rate ~ Intercept + DMI15d + GMP + DT.h + PREC.k15d + T.k15d + T.night + GDD15d + NDVI15d  | 5.091          | 0.002             | 0.910                        | 0.77       |
| 170  | Growth Rate ~ Intercept + DMI15d + GMP + DT.h + PREC.k15d + T.k15d + T.sd15d + T.night + NDVI15d | 5.099          | 0.002             | 0.912                        | 0.77       |

2017

| Rank | Model                                                                                          | $\Delta AIC_c$ | wAIC <sub>c</sub> | Cumulative wAIC <sub>c</sub> | $R_{LR}^2$ |
|------|------------------------------------------------------------------------------------------------|----------------|-------------------|------------------------------|------------|
| 171  | Growth Rate ~ Intercept + GMP + DT.h + PREC + PREC.k15d + T.sd15d                              | 5.120          | 0.002             | 0.913                        | 0.77       |
| 172  | Growth Rate ~ Intercept + GMP + DT.h + PREC + T.sd15d + T.night + GDD15d + NDVI15d             | 5.130          | 0.002             | 0.915                        | 0.77       |
| 173  | Growth Rate ~ Intercept + GMP + DT.h + T.k15d + T.sd15d + T.night + GDD15d + NDVI15d           | 5.158          | 0.002             | 0.917                        | 0.77       |
| 174  | Growth Rate ~ Intercept + DMI15d + GMP + DT.h + PREC + T.sd15d + GDD15d                        | 5.259          | 0.002             | 0.918                        | 0.77       |
| 175  | Growth Rate ~ Intercept + DMI15d + GMP + DT.h + T.k15d + T.sd15d + GDD15d                      | 5.267          | 0.002             | 0.920                        | 0.77       |
| 176  | Growth Rate ~ Intercept + GMP + DT.h + PREC + PREC.k15d + T.sd15d + NDVI15d                    | 5.275          | 0.002             | 0.922                        | 0.77       |
| 177  | Growth Rate ~ Intercept + GMP + DT.h + PREC + T.k15d + T.sd15d                                 | 5.315          | 0.002             | 0.923                        | 0.77       |
| 178  | Growth Rate ~ Intercept + DMI15d + GMP + DT.h + PREC + PREC.k15d + T.k15d                      | 5.318          | 0.002             | 0.925                        | 0.77       |
| 179  | Growth Rate ~ Intercept + DMI15d + GMP + DT.h + PREC + PREC.k15d + T.night + GDD15d + NDVI15d  | 5.323          | 0.002             | 0.926                        | 0.77       |
| 180  | Growth Rate ~ Intercept + GMP + DT.h + PREC + T.k15d + T.sd15d + NDVI15d                       | 5.341          | 0.002             | 0.928                        | 0.77       |
| 181  | Growth Rate ~ Intercept + DMI15d + GMP + DT.h + PREC + PREC.k15d + T.sd15d + T.night + NDVI15d | 5.368          | 0.002             | 0.930                        | 0.77       |
| 182  | Growth Rate ~ Intercept + DMI15d + GMP + DT.h + PREC + T.k15d + T.sd15d                        | 5.374          | 0.002             | 0.931                        | 0.77       |
| 183  | Growth Rate ~ Intercept + DMI15d + GMP + DT.h + PREC + PREC.k15d + T.sd15d + T.night           | 5.383          | 0.002             | 0.933                        | 0.77       |
| 184  | Growth Rate ~ Intercept + DMI15d + GMP + DT.h + PREC + PREC.k15d + T.k15d + NDVI15d            | 5.396          | 0.002             | 0.934                        | 0.77       |
| 185  | Growth Rate ~ Intercept + DMI15d + GMP + DT.h + PREC + T.k15d + GDD15d + NDVI15d               | 5.461          | 0.002             | 0.936                        | 0.77       |
| 186  | Growth Rate ~ Intercept + DMI15d + GMP + DT.h + PREC + PREC.k15d + T.k15d + T.night            | 5.461          | 0.002             | 0.937                        | 0.77       |
| 187  | Growth Rate ~ Intercept + GMP + DT.h + PREC.k15d + T.k15d + T.sd15d                            | 5.550          | 0.001             | 0.939                        | 0.77       |
| 188  | Growth Rate ~ Intercept + GMP + DT.h + PREC + PREC.k15d + T.k15d                               | 5.553          | 0.001             | 0.940                        | 0.77       |
| 189  | Growth Rate ~ Intercept + GMP + DT.h + PREC.k15d + T.k15d + T.sd15d + T.night                  | 5.619          | 0.001             | 0.941                        | 0.77       |
| 190  | Growth Rate ~ Intercept + DMI15d + GMP + DT.h + PREC + T.k15d + GDD15d                         | 5.621          | 0.001             | 0.943                        | 0.77       |
| 191  | Growth Rate ~ Intercept + GMP + DT.h + PREC + PREC.k15d + T.k15d + T.night                     | 5.633          | 0.001             | 0.944                        | 0.77       |
| 192  | Growth Rate ~ Intercept + GMP + DT.h + PREC + PREC.k15d + T.sd15d + T.night                    | 5.666          | 0.001             | 0.945                        | 0.77       |
| 193  | Growth Rate ~ Intercept + GMP + DT.h + PREC + PREC.k15d + T.sd15d + GDD15d                     | 5.704          | 0.001             | 0.947                        | 0.77       |
| 194  | Growth Rate ~ Intercept + GMP + DT.h + PREC + PREC.k15d + T.k15d + GDD15d                      | 5.716          | 0.001             | 0.948                        | 0.77       |
| 195  | Growth Rate ~ Intercept + DMI15d + GMP + DT.h + T.k15d + T.sd15d + T.night + GDD15d + NDVI15d  | 5.730          | 0.001             | 0.949                        | 0.77       |



2018

| Rank | Model                                                                                                   | $\Delta AIC_c$ | wAIC <sub>c</sub> | Cumulative wAIC <sub>c</sub> | $R_{LR}^2$ |
|------|---------------------------------------------------------------------------------------------------------|----------------|-------------------|------------------------------|------------|
| 1    | Growth Rate ~ Intercept + DMI15d + GMP + DT.h + PREC + T.sd15d + T.night + GDD15d                       | 0.000          | 0.051             | 0.048                        | 0.79       |
| 2    | Growth Rate ~ Intercept + DMI15d + GMP + DT.h + T.sd15d + GDD15d                                        | 0.201          | 0.046             | 0.092                        | 0.79       |
| 3    | Growth Rate ~ Intercept + DMI15d + GMP + DT.h + PREC + PREC.k15d + T.sd15d + T.night + GDD15d           | 0.382          | 0.042             | 0.132                        | 0.80       |
| 4    | Growth Rate ~ Intercept + DMI15d + GMP + DT.h + GDD15d                                                  | 0.542          | 0.039             | 0.168                        | 0.79       |
| 5    | Growth Rate ~ Intercept + DMI15d + GMP + DT.h + PREC + T.sd15d + GDD15d                                 | 0.887          | 0.033             | 0.199                        | 0.79       |
| 6    | Growth Rate ~ Intercept + DMI15d + GMP + DT.h + T.sd15d + T.night + GDD15d                              | 1.286          | 0.027             | 0.225                        | 0.79       |
| 7    | Growth Rate ~ Intercept + DMI15d + GMP + DT.h + PREC.k15d + T.sd15d + GDD15d                            | 1.326          | 0.026             | 0.250                        | 0.79       |
| 8    | Growth Rate ~ Intercept + DMI15d + GMP + DT.h + PREC + GDD15d                                           | 1.393          | 0.025             | 0.274                        | 0.79       |
| 9    | Growth Rate ~ Intercept + DMI15d + GMP + DT.h + T.sd15d + GDD15d + NDVI15d                              | 1.632          | 0.022             | 0.295                        | 0.79       |
| 10   | Growth Rate ~ Intercept + DMI15d + GMP + DT.h + PREC + T.k15d + T.sd15d + T.night + GDD15d              | 1.688          | 0.022             | 0.316                        | 0.80       |
| 11   | Growth Rate ~ Intercept + DMI15d + GMP + DT.h + T.k15d + T.sd15d + GDD15d                               | 1.694          | 0.022             | 0.336                        | 0.79       |
| 12   | Growth Rate ~ Intercept + DMI15d + GMP + DT.h + PREC.k15d + GDD15d                                      | 1.755          | 0.021             | 0.356                        | 0.79       |
| 13   | Growth Rate ~ Intercept + DMI15d + GMP + DT.h + PREC + T.sd15d + T.night + GDD15d + NDVI15d             | 1.782          | 0.021             | 0.376                        | 0.80       |
| 14   | Growth Rate ~ Intercept + DMI15d + GMP + DT.h + PREC + PREC.k15d + T.sd15d + GDD15d                     | 1.808          | 0.021             | 0.396                        | 0.79       |
| 15   | Growth Rate ~ Intercept + DMI15d + GMP + DT.h + PREC + T.k15d + T.sd15d + GDD15d                        | 1.873          | 0.020             | 0.414                        | 0.79       |
| 16   | Growth Rate ~ Intercept + DMI15d + GMP + DT.h + PREC + PREC.k15d + T.k15d + T.sd15d + T.night + GDD15d  | 2.066          | 0.018             | 0.432                        | 0.80       |
| 17   | Growth Rate ~ Intercept + DMI15d + GMP + DT.h + PREC + T.sd15d + GDD15d + NDVI15d                       | 2.227          | 0.017             | 0.447                        | 0.79       |
| 18   | Growth Rate ~ Intercept + DMI15d + GMP + DT.h + PREC.k15d + T.sd15d + T.night + GDD15d                  | 2.264          | 0.016             | 0.463                        | 0.79       |
| 19   | Growth Rate ~ Intercept + DMI15d + GMP + DT.h + GDD15d + NDVI15d                                        | 2.273          | 0.016             | 0.478                        | 0.79       |
| 20   | Growth Rate ~ Intercept + DMI15d + GMP + DT.h + PREC + PREC.k15d + T.sd15d + T.night + GDD15d + NDVI15d | 2.302          | 0.016             | 0.494                        | 0.80       |
| 21   | Growth Rate ~ Intercept + DMI15d + GMP + DT.h + PREC + PREC.k15d + GDD15d                               | 2.431          | 0.015             | 0.508                        | 0.79       |
| 22   | Growth Rate ~ Intercept + DMI15d + GMP + DT.h + T.k15d + GDD15d                                         | 2.484          | 0.015             | 0.522                        | 0.79       |
| 23   | Growth Rate ~ Intercept + GMP + DT.h + PREC + PREC.k15d + T.sd15d + T.night + GDD15d                    | 2.553          | 0.014             | 0.535                        | 0.79       |
| 24   | Growth Rate ~ Intercept + DMI15d + GMP + DT.h + T.night + GDD15d                                        | 2.573          | 0.014             | 0.549                        | 0.79       |
| 25   | Growth Rate ~ Intercept + DMI15d + GMP + DT.h + PREC + PREC.k15d + T.k15d + T.sd15d + GDD15d            | 2.702          | 0.013             | 0.561                        | 0.79       |
| 26   | Growth Rate ~ Intercept + DMI15d + GMP + DT.h + PREC.k15d + T.k15d + T.sd15d + GDD15d                   | 2.790          | 0.013             | 0.573                        | 0.79       |
| 27   | Growth Rate ~ Intercept + DMI15d + GMP + DT.h + PREC.k15d + T.sd15d + GDD15d + NDVI15d                  | 2.884          | 0.012             | 0.585                        | 0.79       |
| 28   | Growth Rate ~ Intercept + DMI15d + GMP + DT.h + PREC + T.night + GDD15d                                 | 2.955          | 0.012             | 0.596                        | 0.79       |
| 29   | Growth Rate ~ Intercept + DMI15d + GMP + DT.h + T.sd15d + T.night + GDD15d + NDVI15d                    | 2.978          | 0.011             | 0.606                        | 0.79       |
| 30   | Growth Rate ~ Intercept + DMI15d + GMP + DT.h + PREC + GDD15d + NDVI15d                                 | 3.072          | 0.011             | 0.617                        | 0.79       |
| 31   | Growth Rate ~ Intercept + DMI15d + GMP + DT.h + T.k15d + T.sd15d + GDD15d + NDVI15d                     | 3.072          | 0.011             | 0.627                        | 0.79       |
| 32   | Growth Rate ~ Intercept + DMI15d + GMP + DT.h + PREC + T.k15d + GDD15d                                  | 3.110          | 0.011             | 0.637                        | 0.79       |
| 33   | Growth Rate ~ Intercept + DMI15d + GMP + DT.h + PREC + T.k15d + T.sd15d + GDD15d + NDVI15d              | 3.112          | 0.011             | 0.648                        | 0.79       |
| 34   | Growth Rate ~ Intercept + DMI15d + GMP + DT.h + T.k15d + T.sd15d + T.night + GDD15d                     | 3.149          | 0.011             | 0.657                        | 0.79       |
| 35   | Growth Rate ~ Intercept + DMI15d + GMP + DT.h + PREC + PREC.k15d + T.sd15d + GDD15d + NDVI15d           | 3.293          | 0.010             | 0.667                        | 0.79       |
| 36   | Growth Rate ~ Intercept + GMP + DT.h + PREC + PREC.k15d + T.k15d + T.sd15d + T.night + GDD15d           | 3.391          | 0.009             | 0.676                        | 0.79       |
| 37   | Growth Rate ~ Intercept + DMI15d + GMP + DT.h + PREC + T.k15d + T.sd15d + T.night + GDD15d + NDVI15d    | 3.393          | 0.009             | 0.684                        | 0.80       |
| 38   | Growth Rate ~ Intercept + DMI15d + GMP + DT.h + PREC.k15d + GDD15d + NDVI15d                            | 3.579          | 0.008             | 0.693                        | 0.79       |

2018

| Rank | Model                                                                                                            | $\Delta AIC_c$ | wAIC <sub>c</sub> | Cumulative wAIC <sub>c</sub> | $R_{LR}^2$ |
|------|------------------------------------------------------------------------------------------------------------------|----------------|-------------------|------------------------------|------------|
| 39   | Growth Rate ~ Intercept + DMI15d + GMP + DT.h + PREC.k15d + T.k15d + GDD15d                                      | 3.694          | 0.008             | 0.700                        | 0.79       |
| 40   | Growth Rate ~ Intercept + DMI15d + GMP + DT.h + PREC.k15d + T.night + GDD15d                                     | 3.769          | 0.008             | 0.707                        | 0.79       |
| 41   | Growth Rate ~ Intercept + DMI15d + GMP + DT.h + T.sd15d                                                          | 3.810          | 0.008             | 0.715                        | 0.79       |
| 42   | Growth Rate ~ Intercept + DMI15d + GMP + DT.h + PREC + PREC.k15d + T.night + GDD15d                              | 3.855          | 0.007             | 0.722                        | 0.79       |
| 43   | Growth Rate ~ Intercept + DMI15d + GMP + DT.h + PREC + PREC.k15d + T.k15d + T.sd15d + T.night + GDD15d + NDVI15d | 3.929          | 0.007             | 0.728                        | 0.80       |
| 44   | Growth Rate ~ Intercept + DMI15d + GMP + DT.h + PREC.k15d + T.sd15d + T.night + GDD15d + NDVI15d                 | 4.079          | 0.007             | 0.735                        | 0.79       |
| 45   | Growth Rate ~ Intercept + DMI15d + GMP + DT.h + PREC + PREC.k15d + T.k15d + T.sd15d + GDD15d + NDVI15d           | 4.100          | 0.007             | 0.741                        | 0.80       |
| 46   | Growth Rate ~ Intercept + DMI15d + GMP + DT.h + PREC + PREC.k15d + T.k15d + GDD15d                               | 4.116          | 0.006             | 0.747                        | 0.79       |
| 47   | Growth Rate ~ Intercept + DMI15d + GMP + DT.h + PREC.k15d + T.k15d + T.sd15d + T.night + GDD15d                  | 4.135          | 0.006             | 0.753                        | 0.79       |
| 48   | Growth Rate ~ Intercept + GMP + DT.h + PREC + PREC.k15d + T.sd15d + T.night + GDD15d + NDVI15d                   | 4.152          | 0.006             | 0.759                        | 0.79       |
| 49   | Growth Rate ~ Intercept + DMI15d + GMP + DT.h + PREC + PREC.k15d + GDD15d + NDVI15d                              | 4.217          | 0.006             | 0.765                        | 0.79       |
| 50   | Growth Rate ~ Intercept + DMI15d + GMP + DT.h + T.k15d + GDD15d + NDVI15d                                        | 4.218          | 0.006             | 0.771                        | 0.79       |
| 51   | Growth Rate ~ Intercept + DMI15d + GMP + DT.h + PREC.k15d + T.k15d + T.sd15d + GDD15d + NDVI15d                  | 4.303          | 0.006             | 0.776                        | 0.79       |
| 52   | Growth Rate ~ Intercept + GMP + DT.h + PREC + T.sd15d + T.night + GDD15d                                         | 4.340          | 0.006             | 0.782                        | 0.79       |
| 53   | Growth Rate ~ Intercept + DMI15d + GMP + DT.h + T.night + GDD15d + NDVI15d                                       | 4.360          | 0.006             | 0.787                        | 0.79       |
| 54   | Growth Rate ~ Intercept + DMI15d + GMP + DT.h                                                                    | 4.431          | 0.006             | 0.793                        | 0.79       |
| 55   | Growth Rate ~ Intercept + DMI15d + GMP + DT.h + PREC.k15d + T.sd15d                                              | 4.512          | 0.005             | 0.798                        | 0.79       |
| 56   | Growth Rate ~ Intercept + DMI15d + GMP + DT.h + T.k15d + T.night + GDD15d                                        | 4.571          | 0.005             | 0.803                        | 0.79       |
| 57   | Growth Rate ~ Intercept + GMP + DT.h + PREC + PREC.k15d + T.k15d + T.sd15d + GDD15d                              | 4.697          | 0.005             | 0.807                        | 0.79       |
| 58   | Growth Rate ~ Intercept + DMI15d + GMP + DT.h + T.k15d + T.sd15d + T.night + GDD15d + NDVI15d                    | 4.772          | 0.005             | 0.812                        | 0.79       |
| 59   | Growth Rate ~ Intercept + DMI15d + GMP + DT.h + PREC + T.k15d + GDD15d + NDVI15d                                 | 4.784          | 0.005             | 0.816                        | 0.79       |
| 60   | Growth Rate ~ Intercept + DMI15d + GMP + DT.h + PREC + PREC.k15d + T.sd15d + T.night                             | 4.795          | 0.005             | 0.820                        | 0.79       |
| 61   | Growth Rate ~ Intercept + DMI15d + GMP + DT.h + PREC + T.night + GDD15d + NDVI15d                                | 4.816          | 0.005             | 0.825                        | 0.79       |
| 62   | Growth Rate ~ Intercept + GMP + DT.h + PREC + PREC.k15d + T.k15d + T.sd15d + T.night + GDD15d + NDVI15d          | 4.875          | 0.004             | 0.829                        | 0.79       |
| 63   | Growth Rate ~ Intercept + DMI15d + GMP + DT.h + PREC + T.k15d + T.night + GDD15d                                 | 4.902          | 0.004             | 0.833                        | 0.79       |
| 64   | Growth Rate ~ Intercept + DMI15d + GMP + DT.h + T.sd15d + T.night                                                | 4.914          | 0.004             | 0.837                        | 0.79       |
| 65   | Growth Rate ~ Intercept + DMI15d + GMP + DT.h + PREC + T.sd15d + T.night                                         | 4.919          | 0.004             | 0.841                        | 0.79       |
| 66   | Growth Rate ~ Intercept + GMP + DT.h + PREC + T.k15d + T.sd15d + T.night + GDD15d                                | 4.925          | 0.004             | 0.846                        | 0.79       |
| 67   | Growth Rate ~ Intercept + DMI15d + GMP + DT.h + T.sd15d + NDVI15d                                                | 4.993          | 0.004             | 0.850                        | 0.79       |
| 68   | Growth Rate ~ Intercept + DMI15d + GMP + DT.h + PREC + T.sd15d                                                   | 5.192          | 0.004             | 0.853                        | 0.79       |
| 69   | Growth Rate ~ Intercept + DMI15d + GMP + DT.h + PREC.k15d                                                        | 5.259          | 0.004             | 0.857                        | 0.79       |
| 70   | Growth Rate ~ Intercept + GMP + DT.h + PREC.k15d + T.sd15d + GDD15d                                              | 5.392          | 0.003             | 0.860                        | 0.79       |
| 71   | Growth Rate ~ Intercept + GMP + DT.h + PREC + PREC.k15d + T.k15d + T.sd15d + GDD15d + NDVI15d                    | 5.396          | 0.003             | 0.863                        | 0.79       |
| 72   | Growth Rate ~ Intercept + DMI15d + GMP + DT.h + PREC.k15d + T.sd15d + T.night                                    | 5.414          | 0.003             | 0.866                        | 0.79       |
| 73   | Growth Rate ~ Intercept + GMP + DT.h + PREC + T.sd15d + T.night + GDD15d + NDVI15d                               | 5.472          | 0.003             | 0.869                        | 0.79       |
| 74   | Growth Rate ~ Intercept + GMP + DT.h + PREC + PREC.k15d + T.sd15d + GDD15d                                       | 5.483          | 0.003             | 0.873                        | 0.79       |
| 75   | Growth Rate ~ Intercept + DMI15d + GMP + DT.h + PREC.k15d + T.k15d + GDD15d + NDVI15d                            | 5.523          | 0.003             | 0.876                        | 0.79       |
| 76   | Growth Rate ~ Intercept + GMP + DT.h + PREC.k15d + T.k15d + T.sd15d + GDD15d                                     | 5.577          | 0.003             | 0.879                        | 0.79       |

2018

| Rank | Model                                                                                                     | $\Delta AIC_c$ | wAIC <sub>c</sub> | Cumulative wAIC <sub>c</sub> | $R_{LR}^2$ |
|------|-----------------------------------------------------------------------------------------------------------|----------------|-------------------|------------------------------|------------|
| 77   | Growth Rate ~ Intercept + GMP + DT.h + PREC.k15d + T.sd15d + T.night + GDD15d                             | 5.641          | 0.003             | 0.881                        | 0.79       |
| 78   | Growth Rate ~ Intercept + DMI15d + GMP + DT.h + PREC.k15d + T.night + GDD15d + NDVI15d                    | 5.655          | 0.003             | 0.884                        | 0.79       |
| 79   | Growth Rate ~ Intercept + GMP + DT.h + PREC + T.k15d + T.sd15d + GDD15d                                   | 5.676          | 0.003             | 0.887                        | 0.79       |
| 80   | Growth Rate ~ Intercept + DMI15d + GMP + DT.h + PREC + PREC.k15d + T.sd15d                                | 5.701          | 0.003             | 0.890                        | 0.79       |
| 81   | Growth Rate ~ Intercept + DMI15d + GMP + DT.h + PREC.k15d + T.k15d + T.night + GDD15d                     | 5.777          | 0.003             | 0.893                        | 0.79       |
| 82   | Growth Rate ~ Intercept + GMP + DT.h + PREC + T.k15d + T.sd15d + GDD15d + NDVI15d                         | 5.801          | 0.003             | 0.895                        | 0.79       |
| 83   | Growth Rate ~ Intercept + DMI15d + GMP + DT.h + T.k15d + T.sd15d                                          | 5.805          | 0.003             | 0.898                        | 0.79       |
| 84   | Growth Rate ~ Intercept + DMI15d + GMP + DT.h + PREC + PREC.k15d + T.k15d + T.night + GDD15d              | 5.811          | 0.003             | 0.901                        | 0.79       |
| 85   | Growth Rate ~ Intercept + DMI15d + GMP + DT.h + PREC + PREC.k15d + T.night + GDD15d + NDVI15d             | 5.821          | 0.003             | 0.903                        | 0.79       |
| 86   | Growth Rate ~ Intercept + DMI15d + GMP + DT.h + PREC.k15d + T.sd15d + NDVI15d                             | 5.864          | 0.003             | 0.906                        | 0.79       |
| 87   | Growth Rate ~ Intercept + GMP + DT.h + PREC + T.k15d + T.sd15d + T.night + GDD15d + NDVI15d               | 5.891          | 0.003             | 0.908                        | 0.79       |
| 88   | Growth Rate ~ Intercept + DMI15d + GMP + DT.h + PREC.k15d + T.k15d + T.sd15d + T.night + GDD15d + NDVI15d | 5.893          | 0.003             | 0.911                        | 0.79       |
| 89   | Growth Rate ~ Intercept + DMI15d + GMP + DT.h + PREC + PREC.k15d + T.k15d + GDD15d + NDVI15d              | 5.902          | 0.003             | 0.913                        | 0.79       |
| 90   | Growth Rate ~ Intercept + DMI15d + GMP + DT.h + PREC                                                      | 5.966          | 0.003             | 0.916                        | 0.79       |
| 91   | Growth Rate ~ Intercept + DMI15d + GMP + DT.h + NDVI15d                                                   | 6.002          | 0.003             | 0.918                        | 0.79       |
| 92   | Growth Rate ~ Intercept + GMP + DT.h + T.sd15d + GDD15d                                                   | 6.183          | 0.002             | 0.920                        | 0.79       |
| 93   | Growth Rate ~ Intercept + GMP + DT.h + T.k15d + T.sd15d + GDD15d                                          | 6.191          | 0.002             | 0.923                        | 0.79       |
| 94   | Growth Rate ~ Intercept + GMP + DT.h + PREC + PREC.k15d + T.sd15d + GDD15d + NDVI15d                      | 6.218          | 0.002             | 0.925                        | 0.79       |
| 95   | Growth Rate ~ Intercept + GMP + DT.h + PREC.k15d + T.sd15d + GDD15d + NDVI15d                             | 6.221          | 0.002             | 0.927                        | 0.79       |
| 96   | Growth Rate ~ Intercept + DMI15d + GMP + DT.h + PREC + T.sd15d + NDVI15d                                  | 6.287          | 0.002             | 0.929                        | 0.79       |
| 97   | Growth Rate ~ Intercept + DMI15d + GMP + DT.h + T.k15d + T.night + GDD15d + NDVI15d                       | 6.324          | 0.002             | 0.931                        | 0.79       |
| 98   | Growth Rate ~ Intercept + DMI15d + GMP + DT.h + T.sd15d + T.night + NDVI15d                               | 6.377          | 0.002             | 0.933                        | 0.79       |
| 99   | Growth Rate ~ Intercept + GMP + DT.h + PREC.k15d + T.k15d + T.sd15d + GDD15d + NDVI15d                    | 6.389          | 0.002             | 0.935                        | 0.79       |
| 100  | Growth Rate ~ Intercept + DMI15d + GMP + DT.h + PREC + T.sd15d + T.night + NDVI15d                        | 6.431          | 0.002             | 0.937                        | 0.79       |
| 101  | Growth Rate ~ Intercept + DMI15d + GMP + DT.h + T.night                                                   | 6.477          | 0.002             | 0.939                        | 0.79       |
| 102  | Growth Rate ~ Intercept + GMP + DT.h + T.k15d + T.sd15d + GDD15d + NDVI15d                                | 6.486          | 0.002             | 0.941                        | 0.79       |
| 103  | Growth Rate ~ Intercept + DMI15d + GMP + DT.h + PREC.k15d + T.k15d + T.sd15d                              | 6.488          | 0.002             | 0.942                        | 0.79       |
| 104  | Growth Rate ~ Intercept + GMP + DT.h + T.sd15d + GDD15d + NDVI15d                                         | 6.496          | 0.002             | 0.944                        | 0.79       |
| 105  | Growth Rate ~ Intercept + DMI15d + GMP + DT.h + T.k15d                                                    | 6.508          | 0.002             | 0.946                        | 0.79       |
| 106  | Growth Rate ~ Intercept + DMI15d + GMP + DT.h + PREC + PREC.k15d + T.sd15d + T.night + NDVI15d            | 6.510          | 0.002             | 0.948                        | 0.79       |
| 107  | Growth Rate ~ Intercept + GMP + DT.h + T.sd15d + T.night + GDD15d                                         | 6.590          | 0.002             | 0.950                        | 0.79       |
